# Supplementary material for: Synthesis of novel benzoxaborinin-4-ones and its application in indolin-2-ones synthesis using a Suzuki–Miyaura reaction protocol
Source: Royal Society of Chemistry journal article supplement (doi:10.1039/c5ra05755h), 2015-01-01

**SUPPORTING INFORMATION:**

**Synthesis of Novel Benoxaborinin-4-one and Their Application in Suzuki-Miyaura  
Coupling Reaction to 2-Oxindole Derivatives**

Kannan Murugan, Murugan Chinnapattu, Fazlur Rahman Nawaz Khan<sup>\*</sup>, Pravin S. Iyer<sup>\*</sup>

Experimental procedures and Data for all new compounds S2-S11

## Experimental Section:

All reactions were carried out under nitrogen atmosphere using a Pre-assembled screw top, 7 ml/15ml supelco vials purchased from sigma Aldrich. All anhydrous solvents, reagent grade solvents for chromatography and starting materials were purchased from either Sigma Aldrich Chemical Co., Alfa aesar, Combi-Blocks or Fisher Scientific. Water was distilled and purified through a Milli-Q water system (Millipore Corp., Bedford, MA). General methods of purification of compounds involved the use of silica cartridges purchased from Grace Purification systems. The reactions were monitored by TLC on pre-coated Merck 60 F254 silica gel plates and visualized using UV light (254 nm). All compounds were analyzed for purity by HPLC and characterized by LCMS,  $^1\text{H}$  NMR using Bruker 300 MHz NMR and/or Bruker 400 MHz NMR and/or Bruker 500 MHz NMR spectrometers. Chemical shifts are reported in ppm ( $\delta$ ) relative to the residual solvent peak in the corresponding spectra; chloroform  $\delta$  7.26, DMSO- $d_6$   $\delta$  3.33 and coupling constants (J) are reported in hertz (Hz) (where s = singlet, bs = broad singlet, d = doublet, dd = double doublet, bd = broad doublet, ddd = double doublet of doublet, t = triplet, tt – triple triplet, q = quartet, m = multiplet) and analyzed using ACD NMR data processing software.  $^{11}\text{B}$  NMR spectra were recorded on a Bruker 300 MHz spectrometer at ambient temperature. Mass spectra values are reported as m/z. All reactions were conducted under Nitrogen and monitored using LCMS unless otherwise noted. Solvents were removed *in vacuo* on a rotary evaporator.

**General produce I:** A substituted isatin (1 mmol) and 2-acetyl boronic acid (1.1 mmol) was taken in supelco vial with screw cap and ethanol (5 ml). The vial was heated in thermal block at 120 °C for 16 h. After completion of the reaction, the solvent was evaporated under pressure and the crude was absorbed on silica gel and purified by CombiFlash RF purification system using Hexane:Ethyl acetate as a eluent. The isolated product was triturated with acetonitrile solvent to get diastereoisomeric mixture and one major diastereoisomer products.

### 5-chloro-3-(1-hydroxy-3, 4-dihydro-1H-benzo[c][1,2]oxaborinin-3-yl)-1-methyl-1,3-dihydro-indol-2-one (**1a**)

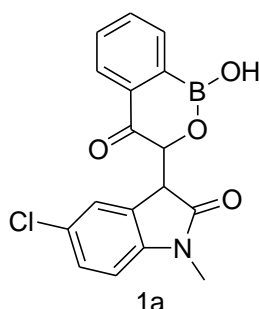

5-chloro-1-methylindoline-2,3-dione (200 mg, 1.03 mmol) was treated with 2-acetyl phenyl boronic acid (185 mg, 1.13 mmol) in ethanol (5 ml) as described in the general procedure I to give **1a** diastereoisomeric mixture as a colourless solid (220 mg, 60%), single diastereoisomer **1aa** (26 mg, 7%) and **1ab** (24 mg, 6.8%).

Mixture of diastereoisomers (**1a**):  $^1\text{H}$  NMR (300MHz, DMSO- $d_6$ ):  $\delta$  = 9.00 (s, 1H) (single isomer), 8.95 (s, 1H) (single isomer), 8.05-7.70 (m, 8H) (mixture of isomers), 7.57 (s, 1H)

(single isomer), 7.40- 7.25 (m, 2H) (mixture of isomers), 7.05-7.02 (m, 2H) (mixture of isomers), 6.48 (s, 1H) (single isomer), 5.59 (d,  $J = 2.2$  Hz, 1H) (single isomer), 5.50 (d,  $J = 2.5$  Hz, 1H) (single isomer), 4.47 (s, 1H) (single isomer), 4.29 (s, 1H) (single isomer), 3.16 (s, 3H) (single isomer), 3.06 (s, 3H) (single isomer); LCMS ( $m/z$ ) = 342 [ $M+1$ ].

Single diastereoisomers **1aa**: White solid; m.p. 204-205 °C;  $^1\text{H}$  NMR (500MHz,  $\text{DMSO-}d_6$ ):  $\delta = 9.01$  (bs, 1H), 7.97 (d,  $J = 7.6$  Hz, 1H), 7.90 (d,  $J = 6.9$  Hz, 1H), 7.70-7.81 (m, 2H), 7.42 (d,  $J = 6.0$  Hz, 1H), 7.12-7.20 (m, 1H), 7.01 (dd,  $J = 8.7, 4.3$  Hz, 1H), 5.57 (d,  $J = 2.2$  Hz, 1H), 4.46 (s, 1H), 3.06 (s, 3H);  $^1\text{H}$  NMR ( $\text{DMSO-}d_6$ , 125 MHz):  $\delta = 196.3, 173.3, 144.0, 138.1, 134.0, 133.2, 132.6, 132.0, 128.7, 128.0, 126.2, 125.2, 123.8, 109.8, 78.5, 50.9, 26.1$ .  $^{11}\text{B}$  NMR (96 MHz,  $\text{DMSO-}d_6$ ):  $\delta = 26.6$ ; HR-MS (ESI): Calcd.  $\text{C}_{17}\text{H}_{13}\text{BClNO}_4$ , [ $M+H$ ] $^+$   $m/z$ : 342.06985, found: 342.06988.

Single diastereoisomers **1ab**: White solid; m.p. 228-230°C;  $^1\text{H}$  NMR (500MHz,  $\text{DMSO-}d_6$ ):  $\delta = 8.96$  (s, 1H), 8.05 - 8.09 (m, 1H), 7.76 - 7.87 (m, 3H), 7.31 (dd,  $J = 8.5, 1.9$  Hz, 1H), 7.05 (d,  $J = 8.2$  Hz, 1H), 6.48 (s, 1H), 5.50 (d,  $J = 2.5$  Hz, 1H), 4.30 (d,  $J = 2.2$  Hz, 1H), 3.16 (s, 3H).  $^1\text{H}$  NMR (125 MHz,  $\text{DMSO-}d_6$ ):  $\delta = 197.1, 174.3, 144.0, 137.9, 134.6, 133.3, 133.0, 132.3, 128.2, 126.1, 125.6, 125.4, 123.5, 110.0, 78.7, 50.0, 26.3$ ;  $^{11}\text{B}$  NMR (96 MHz,  $\text{DMSO-}d_6$ ):  $\delta = 26.7$ . HR-MS (ESI): Calcd.  $\text{C}_{17}\text{H}_{13}\text{BClNO}_4$ , [ $M+H$ ] $^+$   $m/z$ : 342.06985, found: 342.06976.

### 3-(1-Hydroxy-3, 4-dihydro-1H-benzo[*c*][1,2]oxaborinin-3-yl)-1-methyl-1,3-dihydro-indol-2-one (**1b**).

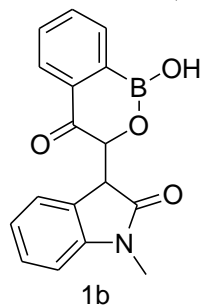

N-Methylindoline-2,3-dione (200 mg, 1.24 mmol) was treated with 2-acetyl phenyl boronic acid (223 mg, 1.36 mmol) in ethanol (5 ml) as described in the general procedure I to give **1** diastereoisomeric mixture as a colourless solid (213 mg, 56%) and single diastereoisomer **2a** (26 mg, 7%)

Mixture of diastereoisomers (**1b**):  $^1\text{H}$  NMR (500MHz,  $\text{DMSO-}d_6$ ):  $\delta = 9.03$  (bs, 1H) (single isomer), 8.88 (bs, 1H) (single isomer), 8.03 - 8.12 (m, 1H) (single isomer), 7.95 (d,  $J = 7.6$  Hz, 1H) (single isomer), 7.90 (d,  $J = 7.3$  Hz, 1H) (single isomer), 7.69 - 7.84 (m, 6H) (mixture of isomers), 7.44 (d,  $J = 7.3$  Hz, 1H) (single isomer), 7.30 (t,  $J = 7.9$  Hz, 1H) (single isomer), 7.22 (t,  $J = 7.7$  Hz, 1H) (single isomer), 6.97 - 7.07 (m, 2H) (mixture of isomers), 6.75 (t,  $J = 7.4$  Hz, 1H) (single isomer), 6.49 (d,  $J = 7.3$  Hz, 1H) (single isomer), 5.54 (s, 1H) (single isomer), 5.49 (d,  $J = 2.2$  Hz, 1H) (single isomer), 4.39 (s, 1H) (single isomer), 4.26 (s, 1H) (single isomer), 3.17 (s, 3H) (single isomer), 3.08 (s, 3H) (single isomer). LCMS ( $m/z$ ) = 308 [ $M+1$ ].

Major diastereoisomers (**1ba**): White solid, m.p. 208-210 °C;  $^1\text{H}$  NMR (500MHz,  $\text{DMSO-}d_6$ ):  $\delta = 8.88$  (s, 1H), 8.05-8.11 (m, 1H), 7.74-7.84 (m, 3H), 7.22 (t,  $J = 7.6$  Hz, 1H), 7.01 (d,  $J = 7.6$  Hz, 1H), 6.75 (t,  $J = 7.6$  Hz, 1H), 6.49 (d,  $J = 7.6$  Hz, 1H), 5.48 (d,  $J = 2.5$  Hz, 1H),

4.26 (s, 1H), 3.17 (s, 3H);  $^1\text{H NMR}$  (125 MHz,  $\text{DMSO-}d_6$ ):  $\delta = 197.3, 174.5, 144.9, 137.8, 134.4, 133.1, 132.9, 132.1, 128.3, 125.2, 123.7, 123.1, 121.6, 108.5, 78.7, 49.9, 26.1$ ; HR-MS (ESI): Calcd.  $\text{C}_{17}\text{H}_{14}\text{BNO}_4$ ,  $[\text{M}+\text{H}]^+$   $m/z$ : 308.10885, found: 308.10889.

### 3-(1-Hydroxy-3, 4-dihydro-1H-benzo[*c*][1,2]oxaborinin-3-yl)-1,3-dihydro-indol-2-one (1c).

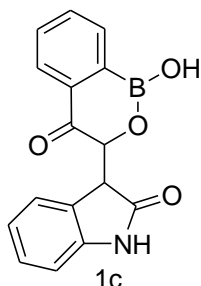

Isatine (200 mg, 1.36 mmol) was treated with 2-acetyl phenyl boronic acid (245 mg, 1.49 mmol) in ethanol (5 ml) as described in the general procedure I to give **1** diastereoisomeric mixture as a colourless solid (167 mg, 42%) and single diastereoisomer **1ca** (32 mg, 8%).

Mixture of diastereoisomers (**1c**):  $^1\text{H NMR}$  (300 MHz,  $\text{DMSO-}d_6$ ):  $\delta = 10.52$  (s, 1H) (single isomer), 10.41 (s, 1H) (single isomer), 9.01 (s, 1H) (single isomer), 8.89 (s, 1H) (single isomer), 7.63 - 8.14 (m, 8H) (mixture of isomers), 7.39 (d,  $J = 7.2$  Hz, 1H) (single isomer), 7.04 - 7.24 (m, 2H) (mixture of isomers), 6.96 (t,  $J = 7.4$  Hz, 1H) (single isomer), 6.82 (d,  $J = 7.5$  Hz, 2H) (single isomer), 6.66 (t,  $J = 7.5$  Hz, 1H) (single isomer), 6.43 (d,  $J = 7.5$  Hz, 1H) (single isomer), 5.49 (d,  $J = 2.1$  Hz, 1H) (single isomer), 5.43 (d,  $J = 2.3$  Hz, 1H) (single isomer), 4.33 (s, 1H) (single isomer), 4.16 (s, 1H) (single isomer). LCMS ( $m/z$ ) = 294  $[\text{M}+1]$ .

Major diastereoisomers (**1ca**):  $^1\text{H NMR}$  (500 MHz,  $\text{DMSO-}d_6$ ):  $\delta = 10.54$  (s, 1H), 8.91 (s, 1H), 8.03 - 8.15 (m, 1H), 7.72 - 7.90 (m, 3H), 7.11 (t,  $J = 7.7$  Hz, 1H), 6.82 (d,  $J = 7.8$  Hz, 1H), 6.66 (t,  $J = 7.6$  Hz, 1H), 6.43 (d,  $J = 7.3$  Hz, 1H), 5.43 (d,  $J = 2.2$  Hz, 1H), 4.17 (s, 1H).  $^1\text{H NMR}$  (125 MHz,  $\text{DMSO-}d_6$ ):  $\delta = 197.5, 176.4, 143.6, 137.9, 134.5, 133.3, 133.0, 132.2, 128.2, 125.3, 124.6, 123.6, 121.0, 109.5, 78.93, 50.59$ . HR-MS (ESI): Calcd.  $\text{C}_{16}\text{H}_{12}\text{BNO}_4$ ,  $[\text{M}+\text{H}]^+$   $m/z$ : 294.09315, found: 294.09323.

### 5-Fluoro-3-(1-hydroxy-3, 4-dihydro-1H-benzo[*c*][1,2]oxaborinin-3-yl)-1-methyl-1,3-dihydro-indol-2-one (1d).

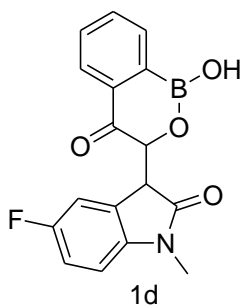

5-Fluoro-1-methylindoline-2,3-dione (200 mg, 1.12 mmol) was treated with 2-acetyl phenyl boronic acid (202 mg, 1.23 mmol) in ethanol (5 ml) as described in the general procedure I to

give **1d** diastereoisomeric mixture as a colourless solid (254 mg, 70%), single diastereoisomer **1da** (32 mg, 9 %).

Mixture of diastereoisomers (**1d**):  $^1\text{H NMR}$  (300 MHz,  $\text{DMSO-}d_6$ ):  $\delta = 9.00$  (s, 1H) (single isomer), 8.93 (s, 1H) (single isomer), 8.02 - 8.12 (m, 1H) (single isomer), 7.67 - 8.02 (m, 7H) (mixture of isomers), 7.41 (d,  $J = 8.3$  Hz, 1H) (single isomer), 6.95 - 7.20 (m, 4H) (mixture of isomers), 6.31 (d,  $J = 6.6$  Hz, 1H) (single isomer), 5.56 (d,  $J = 2.3$  Hz, 1H) (single isomer), 5.49 (d,  $J = 2.3$  Hz, 1H) (single isomer), 4.45 (s, 1H) (single isomer), 4.28 (s, 1H) (single isomer), 3.16 (s, 3H) (single isomer), 3.06 (s, 3H) (single isomer). LCMS ( $m/z$ ) = 326 [ $M+1$ ].

Major diastereoisomers (**1da**):  $^1\text{H NMR}$  (500MHz,  $\text{DMSO-}d_6$ ):  $\delta = 9.01$  (bs, 1H), 7.97 (d,  $J = 7.6$  Hz, 1H), 7.90 (d,  $J = 6.9$  Hz, 1H), 7.70-7.81 (m, 2H), 7.42 (d,  $J = 6.0$  Hz, 1H), 7.12-7.20 (m, 1H), 7.01 (dd,  $J = 8.7, 4.3$  Hz, 1H), 5.57 (d,  $J = 2.2$  Hz, 1H), 4.46 (s, 1H), 3.06 (s, 3H).  $^1\text{H NMR}$  (125 MHz,  $\text{DMSO-}d_6$ ):  $\delta = 196.3, 173.3, 158.4$  (d,  $J = 235$  Hz), 141.3, 138.1, 134.0, 133.2, 132.7, 132.0, 128.4 (d,  $J = 8.7$  Hz), 125.2, 114.2 (d,  $J = 22$  Hz), 111.6 (d,  $J = 25$  Hz), 109.1 (d,  $J = 8.7$  Hz), 78.5, 51.2, 26.1. HR-MS (ESI): Calcd.  $\text{C}_{17}\text{H}_{13}\text{BFNO}_4$ , [ $M+H$ ] $^+$   $m/z$ : 326.09945, found: 326.09953.

### 5-Bromo-3-(1-hydroxy-3, 4-dihydro-1H-benzo[c][1,2]oxaborinin-3-yl)-1-methyl-1,3-dihydro-indol-2-one (**1e**).

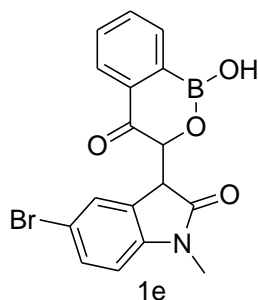

5-Bromo-1-methylindoline-2,3-dione (200 mg, 0.84 mmol) was treated with 2-acetyl phenyl boronic acid (151 mg, 0.92 mmol) in ethanol (5 ml) as described in the general procedure I to give **1e** diastereoisomeric mixture as a colourless solid (168 mg, 52%), single diastereoisomer **1ea** (28 mg, 8.6 %).

Mixture of diastereoisomers (**1e**):  $^1\text{H NMR}$  (300 MHz,  $\text{DMSO-}d_6$ ):  $\delta = 9.00$  (s, 1H) (single isomer), 8.95 (s, 1H) (single isomer), 8.02 - 8.11 (m, 1H) (single isomer), 7.97 (d,  $J = 7.4$  Hz, 1H) (single isomer), 7.65 - 7.93 (m, 7H) (mixture of isomers), 7.37 - 7.54 (m, 2H) (single isomer), 6.99 (d,  $J = 8.3$  Hz, 2H) (single isomer), 6.59 (s, 1H) (single isomer), 5.58 (d,  $J = 2.3$  Hz, 1H) (single isomer), 5.49 (d,  $J = 2.5$  Hz, 1H) (single isomer) 4.48 (s, 1H) (single isomer), 4.29 (s, 1H) (single isomer), 3.15 (s, 3H) (single isomer), 3.06 (s, 3H) (single isomer). LCMS ( $m/z$ ) = 386 [ $M+1$ ].

Major diastereoisomers (**1ea**):  $^1\text{H NMR}$  (500 MHz,  $\text{DMSO-}d_6$ ):  $\delta = 9.01$  (s, 1H), 7.97 (d,  $J = 7.6$  Hz, 1H), 7.89 (d,  $J = 7.2$  Hz, 1H), 7.68 - 7.81 (m, 3H), 7.50 (d,  $J = 8.2$  Hz, 1H), 6.99 (d,  $J = 8.2$  Hz, 1H), 5.59 (d,  $J = 1.9$  Hz, 1H), 4.49 (s, 1H), 3.06 (s, 3H).  $^1\text{H NMR}$  (125 MHz,  $\text{DMSO-}d_6$ ):  $\delta = 196.3, 173.2, 144.4, 138.1, 134.0, 133.2, 132.6, 132.0, 130.8, 129.0, 126.4,$

125.2, 113.9, 110.3, 78.45, 50.9, 26.0. HR-MS (ESI): Calcd. C<sub>17</sub>H<sub>13</sub>BBrNO<sub>4</sub>, [M+H]<sup>+</sup> m/z: 386.01935, found: 386.01901.

**3-(1-Hydroxy-3, 4-dihydro-1H-benzo[c][1,2]oxaborinin-3-yl)-1, 5-dimethyl-1,3-dihydro-indol-2-one (1f).**

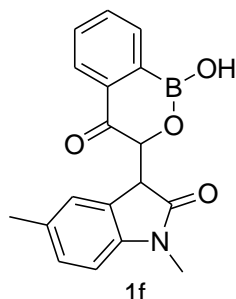

5-Methyl-1-methylindoline-2,3-dione (200 mg, 1.14 mmol) was treated with 2-acetyl phenyl boronic acid (206 mg, 1.25 mmol) in ethanol (5 ml) as described in the general procedure I to give **1f** diastereoisomeric mixture as a colourless solid (165 mg, 45%), single diastereoisomer **1fa** (21 mg, 5.7 %).

Mixture of diastereoisomers (**1f**): <sup>1</sup>H NMR (300 MHz, DMSO-*d*<sub>6</sub>): δ = 8.98 (s, 1H) (single isomer), 8.86 (s, 1H) (single isomer), 7.67 - 8.13 (m, 8H) (mixture of isomers), 7.27 (s, 1H) (single isomer), 7.10 (d, *J* = 7.9 Hz, 1H) (single isomer), 7.02 (d, *J* = 7.9 Hz, 1H) (single isomer), 6.89 (s, 1H) (single isomer), 6.87 (s, 1H) (single isomer), 6.27 (s, 1H) (single isomer), 5.50 (d, *J* = 2.1 Hz, 1H) (single isomer), 5.45 (d, *J* = 2.3 Hz, 1H) (single isomer), 4.35 (s, 1H) (single isomer), 4.18 (s, 1H) (single isomer), 3.14 (s, 3H) (single isomer), 3.04 (s, 3H) (single isomer), 2.27 (s, 3H) (single isomer), 1.95 (s, 3H). LCMS (m/z) = 322 [M+1].

Major diastereoisomers (**1fa**): <sup>1</sup>H NMR (500 MHz, DMSO-*d*<sub>6</sub>): δ = 8.88 (s, 1H), 8.04 - 8.14 (m, 1H), 7.74 - 7.87 (m, 3H), 7.05 (d, *J* = 7.9 Hz, 1H), 6.88 (d, *J* = 7.9 Hz, 1H), 6.27 (s, 1H), 5.45 (d, *J* = 2.5 Hz, 1H), 4.19 (s, 1H), 3.14 (s, 3H), 1.95 (s, 3H). <sup>1</sup>H NMR (125 MHz, DMSO-*d*<sub>6</sub>): δ = 197.3, 174.3, 142.6, 137.9, 134.3, 133.1, 133.0, 132.1, 130.2, 128.4, 125.2, 124.2, 123.6, 108.1, 78.7, 49.9, 26.1, 20.3. HR-MS (ESI): Calcd. C<sub>18</sub>H<sub>16</sub>BNO<sub>4</sub>, [M+H]<sup>+</sup> m/z: 322.12445, found: 322.12474.

General produce for Suzuki-Miyaura reaction: Substituted submitted benzoxaborinin-4-one (1 mmol), Ar/Het halide (1.3 mmol) and NaHCO<sub>3</sub> (1.5 mmol) were taken in supelco vial with screw cap and followed by addition of DME:Water (6 mL, 5:1 ratio). The reaction mixture was degassed for 5 min in nitrogen gas. Then Tetrakis(triphenylphosphine)palladium(0) (10 % mol) was added and heated in thermal block at 100 °C for 5 min. The reaction mixture was diluted with ethyl acetate (50 mL) and washed with water, brine solution and dried over sodium sulphate. The organic layer was evaporated under pressure. The resultant crude was absorbed on silica gel and purified by CombiFlash RF purification system using Hexane:Ethyl acetate as a eluent to afford pure product.

**3-[2-(4'-Chloro-biphenyl-2-yl)-2-oxo-eth-(Z)-ylidene]-5-fluoro-1-methyl-1,3-dihydro-indol-2-one (2a)**

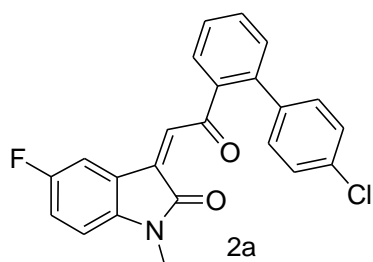

Compound **1d** (50 mg, 0.15 mmol) was treated with 1-chloro-4-iodobenzene (47 mg, 0.2 mmol),  $\text{NaHCO}_3$  (19 mg, 0.225 mmol) and Tetrakis(triphenylphosphine)palladium(0) (17 mg, 10 % mol) as described in the general procedure Suzuki-Miyaura reaction to afford compound **2a** as a light red colour solid (40 mg, 65 %).  $^1\text{H}$  NMR (400 MHz,  $\text{CDCl}_3$ ):  $\delta$  = 8.16 (dd,  $J$  = 9.3, 2.8 Hz, 1H), 7.77 (dd,  $J$  = 7.8, 1.3 Hz, 1H), 7.59 - 7.65 (m, 1H), 7.50 - 7.56 (m, 1H), 7.42 - 7.46 (m, 1H), 7.17 - 7.26 (m, 4H), 7.11 (td,  $J$  = 8.7, 2.8 Hz, 1H), 6.92 (s, 1H), 6.70 (dd,  $J$  = 8.5, 4.0 Hz, 1H), 3.16 (s, 3H).  $^{13}\text{C}$  NMR (125 MHz,  $\text{CDCl}_3$ ):  $\delta$  = 195.2, 167.3, 158.8 (d,  $J$  = 238 Hz), 140.9 (d,  $J$  = 1 Hz), 140.5, 139.8, 128.6, 134.4, 134.2 (d,  $J$  = 3 Hz), 131.9, 130.4, 130.3, 130.0, 128.8, 128.7, 128.0, 120.9 (d,  $J$  = 9 Hz), 118.7 (d,  $J$  = 24 Hz), 115.0 (d,  $J$  = 27 Hz), 108.4, 26.2. HR-MS (ESI): Calcd.  $\text{C}_{23}\text{H}_{15}\text{ClFNO}_2$ ,  $[\text{M}+\text{H}]^+$   $m/z$ : 392.08475, found: 392.08436.

**5-Fluoro-1-methyl-3-[2-oxo-2-[2-(6-trifluoromethyl-pyridin-3-yl)-phenyl]-eth-(Z)-ylidene]-1,3-dihydro-indol-2-one (2b)**

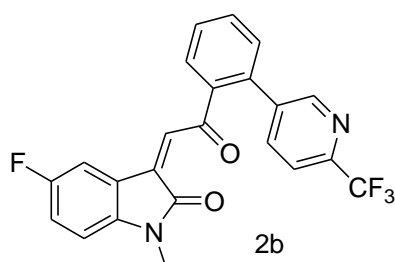

Compound **1d** (50 mg, 0.15 mmol) was treated with 5-bromo-2-(trifluoromethyl)pyridine (45 mg, 0.2 mmol),  $\text{NaHCO}_3$  (19 mg, 0.22 mmol) and Tetrakis(triphenylphosphine)palladium(0) (17 mg, 10 % mol) as described in the general procedure Suzuki-Miyaura reaction to afford compound **2b** as a light red colour solid (37 mg, 57 %).  $^1\text{H}$  NMR (400 MHz,  $\text{CDCl}_3$ ):  $\delta$  = 8.60 (d,  $J$  = 2.0 Hz, 1H), 8.07 (dd,  $J$  = 9.0, 2.5 Hz, 1H), 7.85 - 7.93 (m, 2H), 7.59 - 7.73 (m, 3H), 7.45 (dd,  $J$  = 7.5, 1.0 Hz, 1H), 7.21 (s, 1H), 7.11 (td,  $J$  = 8.6, 2.8 Hz, 1H), 6.70 (dd,  $J$  = 8.5, 4.5 Hz, 1H), 3.17 (s, 3H).  $^{13}\text{C}$  NMR (125 MHz,  $\text{CDCl}_3$ ):  $\delta$  = 193.3, 167.1, 158.8 (d,  $J$  = 238 Hz), 149.7, 147.2 (q,  $J$  = 33 Hz), 142.3, 139.2, 137.4, 135.9 (d,  $J$  = 4 Hz), 132.4, 130.9, 129.4, 129.1, 128.8, 121.4 (q,  $J$  = 271 Hz), 120.6, 120.5, 120.1 (d,  $J$  = 4 Hz), 119.5, 119.3, 115.4 (d,  $J$  = 26 Hz), 108, 26.2. HR-MS (ESI): Calcd.  $\text{C}_{23}\text{H}_{14}\text{F}_4\text{N}_2\text{O}_2$ ,  $[\text{M}+\text{H}]^+$   $m/z$ : 427.10635, found: 427.10617.

**2'-{2-[5-Fluoro-1-methyl-2-oxo-1,2-dihydro-indol-(3Z)-ylidene]-acetyl}-biphenyl-4-carbonitrile (2c):**

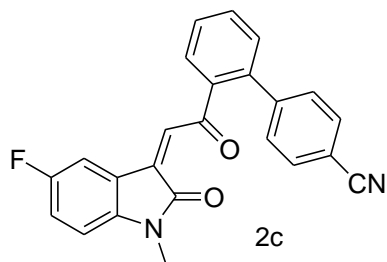

Compound **1d** (50 mg, 0.15 mmol) was treated with 4-bromobenzonitrile (36 mg, 0.2 mmol), NaHCO<sub>3</sub> (19 mg, 0.22 mmol) and Tetrakis(triphenylphosphine)palladium(0) (17 mg, 10 % mol) as described in the general procedure Suzuki-Miyaura reaction to afford compound **2c** as a light red colour solid (27 mg, 46 %). <sup>1</sup>H NMR (400 MHz, CDCl<sub>3</sub>): δ = 8.16 (dd, *J* = 9.0, 2.5 Hz, 1H), 7.81 (dd, *J* = 7.5, 1.0 Hz, 1H), 7.63 - 7.69 (m, 1H), 7.54 - 7.61 (m, 3H), 7.38 - 7.48 (m, 3H), 7.13 (td, *J* = 8.6, 2.8 Hz, 1H), 7.00 (s, 1H), 6.72 (dd, *J* = 8.5, 4.0 Hz, 1H), 3.18 (s, 3H). <sup>13</sup>C NMR (100 MHz, CDCl<sub>3</sub>): δ = 194.4, 167.2, 158.8 (d, *J* = 238 Hz), 145.0, 142.2, 139.8, 139.6, 135.1 (d, *J* = 2 Hz), 132.2, 132.1, 130.1, 129.8, 129.5, 129.1, 128.8, 120.7 (d, *J* = 10 Hz), 119.2 (d, *J* = 24 Hz), 118.4, 115.2 (d, *J* = 27 Hz), 111.8, 108.6 (d, *J* = 8 Hz), 26.3. HR-MS (ESI): Calcd. C<sub>24</sub>H<sub>15</sub>FN<sub>2</sub>O<sub>2</sub>, [M+H]<sup>+</sup> *m/z*: 383.11905, found: 383.11839.

### 3-[2-(4'-Chloro-biphenyl-2-yl)-2-oxo-eth-(Z)-ylidene]-1,3-dihydro-indol-2-one (**2d**)

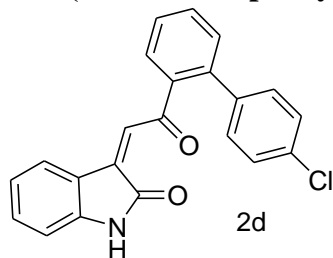

Compound **1c** (50 mg, 0.17 mmol) was treated with 1-chloro-4-iodobenzene (52 mg, 0.22 mmol), NaHCO<sub>3</sub> (21 mg, 0.255 mmol) and Tetrakis(triphenylphosphine)palladium(0) (19 mg, 10 % mol) as described in the general procedure Suzuki-Miyaura reaction to afford compound **2d** as a light red colour solid (38 mg, 62 %). <sup>1</sup>H NMR (400 MHz, CDCl<sub>3</sub>): δ = 8.35 (d, *J* = 7.5 Hz, 1H), 7.83 (bs, 1H), 7.78 (dd, *J* = 7.5, 1.0 Hz, 1H), 7.58 - 7.64 (m, 1H), 7.50 - 7.55 (m, 1H), 7.44 (d, *J* = 7.0 Hz, 1H), 7.34 (td, *J* = 7.8, 1.0 Hz, 1H), 7.20 - 7.26 (m, 4H), 7.00 - 7.07 (m, 1H), 6.90 (s, 1H), 6.82 (d, *J* = 7.5 Hz, 1H). <sup>13</sup>C NMR (100 MHz, CDCl<sub>3</sub>): δ = 195.2, 168.8, 143.1, 140.5, 139.9, 138.7, 134.9, 134.4, 132.8, 131.8, 130.4, 130.1, 129.2, 128.8, 128.7, 128.0, 127.9, 122.8, 120.9, 109.9. HR-MS (ESI): Calcd. C<sub>22</sub>H<sub>14</sub>ClNO<sub>2</sub>, [M+H]<sup>+</sup> *m/z*: 360.07855, found: 360.07799.

### 3-[2-Oxo-2-[2-(6-trifluoromethyl-pyridin-3-yl)-phenyl]-eth-(Z)-ylidene]-1,3-dihydro-indol-2-one (**2e**)

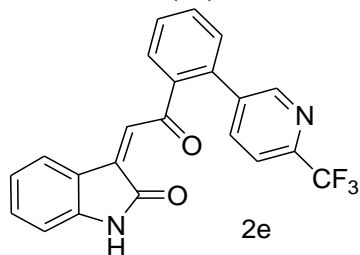



Compound **1c** (50 mg, 0.17 mmol) was treated with 5-bromo-2-(trifluoromethyl)pyridine (42 mg, 0.22 mmol), NaHCO<sub>3</sub> (21 mg, 0.255 mmol) and Tetrakis(triphenylphosphine)palladium(0) (19 mg, 10 % mol) as described in the general procedure Suzuki-Miyaura reaction to afford compound **2e** as a light red colour solid (23 mg, 35 %). <sup>1</sup>H NMR (500 MHz, DMSO-*d*<sub>6</sub>): δ = 10.71 (s, 1H), 8.71 (d, *J* = 1.6 Hz, 1H), 8.10 (dd, *J* = 8.0, 2.0 Hz, 1H), 7.97 (d, *J* = 7.6 Hz, 2H), 7.87 (d, *J* = 7.9 Hz, 1H), 7.76 - 7.81 (m, 1H), 7.68 - 7.74 (m, 1H), 7.59 - 7.64 (m, 1H), 7.31 - 7.39 (m, 1H), 7.09 (s, 1H), 6.92 (t, *J* = 7.7 Hz, 1H), 6.85 (d, *J* = 7.9 Hz, 1H). <sup>1</sup>H NMR (125 MHz, CDCl<sub>3</sub>): δ = 193.6, 167.9, 149.6, 145.2 (d, *J* = 34 Hz), 145.1, 139.5, 138.7, 138.2, 136.4, 136.0, 133.3, 132.5, 131.2, 129.4, 129.2, 127.6, 126.9, 121.72, 121.6 (d, *J* = 272 Hz), 120.2, 119.6, 54.9. HR-MS (ESI): Calcd. C<sub>22</sub>H<sub>13</sub>F<sub>3</sub>N<sub>2</sub>O<sub>2</sub>, [M+H]<sup>+</sup> *m/z*: 395.10015, found: 395.1006.

### 3-[2-(4'-Chloro-biphenyl-2-yl)-2-oxo-eth-(*Z*)-ylidene]-1-methyl-1,3-dihydro-indol-2-one (2f)

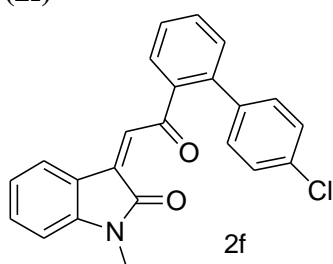

Compound **1b** (50 mg, 0.16 mmol) was treated with 1-chloro-4-iodobenzene (50 mg, 0.21 mmol), NaHCO<sub>3</sub> (20 mg, 0.24 mmol) and Tetrakis(triphenylphosphine)palladium(0) (19 mg, 10 % mol) as described in the general procedure Suzuki-Miyaura reaction to afford compound **2f** as a light red colour solid (39 mg, 65 %). <sup>1</sup>H NMR (400 MHz, CDCl<sub>3</sub>): δ = 8.35 (d, *J* = 7.5 Hz, 1H), 7.77 (dd, *J* = 7.8, 1.3 Hz, 1H), 7.57 - 7.64 (m, 1H), 7.48 - 7.54 (m, 1H), 7.36 - 7.46 (m, 2H), 7.16 - 7.25 (m, 4H), 7.01 - 7.08 (m, 1H), 6.93 (s, 1H), 6.78 (d, *J* = 7.5 Hz, 1H), 3.17 (s, 3H). <sup>1</sup>H NMR (100 MHz, CDCl<sub>3</sub>): δ = 195.4, 167.6, 145.9, 140.5, 140.0, 138.7, 134.7, 134.3, 132.6, 131.7, 130.4, 130.0, 129.2, 128.8, 128.7, 127.9, 127.4, 122.6, 120.1, 108.1, 26.1. HR-MS (ESI): Calcd. C<sub>23</sub>H<sub>16</sub>ClNO<sub>2</sub>, [M+H]<sup>+</sup> *m/z*: 374.09425, found: 374.09408.

### 1-Methyl-3-[2-oxo-2-[2-(6-trifluoromethyl-pyridin-3-yl)-phenyl]-eth-(*Z*)-ylidene]-1,3-dihydro-indol-2-one (2g)

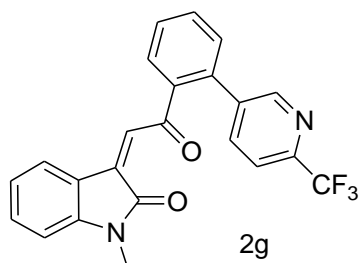

Compound **1b** (50 mg, 0.16 mmol) was treated with 5-bromo-2-(trifluoromethyl)pyridine (47 mg, 0.21 mmol), NaHCO<sub>3</sub> (20 mg, 0.24 mmol) and Tetrakis(triphenylphosphine)palladium(0) (19 mg, 10 % mol) as described in the general procedure Suzuki-Miyaura reaction to afford compound **2g** as a light red colour solid (28 mg, 43 %). <sup>1</sup>H NMR (400 MHz, CDCl<sub>3</sub>): δ = 8.62 (d, *J* = 2.0 Hz, 1H) 8.25 (d, *J* = 7.5 Hz, 1H) 7.91 (dd, *J* = 7.5, 1.0 Hz, 1H) 7.85 (dd, *J* = 8.0, 1.5 Hz, 1H) 7.59 - 7.71 (m, 3H) 7.36 - 7.47 (m, 2H) 7.23 (s, 1H) 6.97 - 7.04 (m, 1H) 6.78

(d,  $J = 8.0$  Hz, 1H) 3.19 (s, 3H).  $^1\text{H NMR}$  (100 MHz,  $\text{CDCl}_3$ ):  $\delta = 193.5, 167.5, 149.7, 147.1$  (q,  $J = 35$  Hz), 146.2, 139.4, 139.3, 137.4, 136.8, 136.4, 133.3, 132.2, 130.9, 129.4, 129.1, 127.8, 127.6, 122.8, 121.5 (q,  $J = 272$  Hz), 119.9 (d,  $J = 3$  Hz), 119.7, 108.2, 26.1. HR-MS (ESI): Calcd.  $\text{C}_{23}\text{H}_{15}\text{F}_3\text{N}_2\text{O}_2$ ,  $[\text{M}+\text{H}]^+$   $m/z$ : 409.11585, found: 409.11576.

**5-Chloro-3-[2-(4'-chloro-biphenyl-2-yl)-2-oxo-eth-(Z)-ylidene]-1-methyl-1,3-dihydro-indol-2-one (2h)**

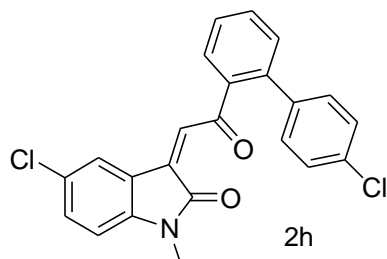

Compound **1a** (50 mg, 0.14 mmol) was treated with 1-chloro-4-iodobenzene (45 mg, 0.19 mmol),  $\text{NaHCO}_3$  (18 mg, 0.21 mmol) and Tetrakis(triphenylphosphine)palladium(0) (16 mg, 10 % mol) as described in the general procedure for Suzuki-Miyaura reaction to afford compound **2h** as a light red colour solid (32 mg, 55 %).  $^1\text{H NMR}$  (400 MHz,  $\text{CDCl}_3$ ):  $\delta = 8.35$  (d,  $J = 2.0$  Hz, 1H), 7.77 (dd,  $J = 7.5, 1.0$  Hz, 1H), 7.59 - 7.65 (m, 1H), 7.50 - 7.55 (m, 1H), 7.43 (dd,  $J = 7.5, 1.0$  Hz, 1H), 7.36 (dd,  $J = 8.3, 2.3$  Hz, 1H), 7.18 - 7.26 (m, 4H), 6.90 (s, 1H), 6.71 (d,  $J = 8.0$  Hz, 1H), 3.15 (s, 3H).  $^1\text{H NMR}$  (100 MHz,  $\text{CDCl}_3$ ):  $\delta = 195.2, 167.1, 144.2, 140.5, 139.7, 138.6, 134.5, 133.5, 132.1, 131.9, 130.6, 130.5, 130.0, 128.8, 128.7, 128.1, 128.0, 127.3, 121.1, 108.9, 26.7$ . HR-MS (ESI): Calcd.  $\text{C}_{23}\text{H}_{15}\text{Cl}_2\text{NO}_2$ ,  $[\text{M}+\text{H}]^+$   $m/z$ : 408.05525, found: 408.05417.

**5-Chloro-1-methyl-3-[2-oxo-2-[2-(6-trifluoromethyl-pyridin-3-yl)-phenyl]-eth-(Z)-ylidene]-1,3-dihydro-indol-2-one (2i)**

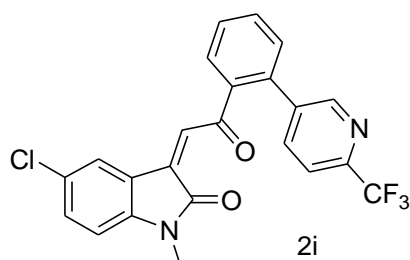

Compound **1a** (50 mg, 0.14 mmol) was treated with 5-bromo-2-(trifluoromethyl)pyridine (43 mg, 0.19 mmol),  $\text{NaHCO}_3$  (19 mg, 0.21 mmol) and Tetrakis(triphenylphosphine)palladium(0) (16 mg, 10 % mol) as described in the general procedure for Suzuki-Miyaura reaction to afford compound **2i** as a light red colour solid (27 mg, 41 %).  $^1\text{H NMR}$  (400 MHz,  $\text{CDCl}_3$ ):  $\delta = 8.61$  (d,  $J = 2.0$  Hz, 1 H), 8.27 (d,  $J = 2.0$  Hz, 1H), 7.89 (ddd,  $J = 14.2, 7.9, 1.5$  Hz, 2H), 7.60 - 7.73 (m, 3H), 7.44 - 7.48 (m, 1H), 7.37 (dd,  $J = 8.5, 2.0$  Hz, 1H), 7.19 (s, 1H), 6.72 (d,  $J = 8.0$  Hz, 1H), 3.17 (s, 3H).  $^1\text{H NMR}$  (100 MHz,  $\text{CDCl}_3$ ):  $\delta = 193.4, 167.0, 149.7, 147.2$  (q,  $J = 27$  Hz), 144.5, 139.1, 137.4, 136.8, 135.2, 132.7, 132.5, 130.9, 129.5, 129.2, 129.1, 128.2, 127.7, 121.4 (q,  $J = 218$ ), 120.8, 120.14, 120.12, 109.1, 26.2. HR-MS (ESI): Calcd.  $\text{C}_{23}\text{H}_{14}\text{ClF}_3\text{N}_2\text{O}_2$ ,  $[\text{M}+\text{H}]^+$   $m/z$ : 443.07685, found: 443.0769.

**5-Bromo-3-[2-(4'-chloro-biphenyl-2-yl)-2-oxo-eth-(Z)-ylidene]-1-methyl-1,3-dihydro-indol-2-one (2j)**

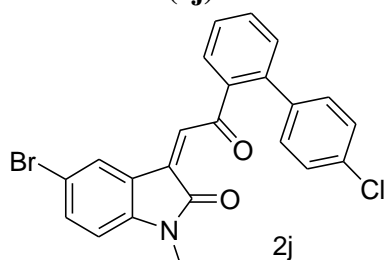

Compound **1e** (50 mg, 0.130 mmol) was treated with 1-chloro-4-iodobenzene (40 mg, 0.17 mmol),  $\text{NaHCO}_3$  (16 mg, 0.195 mmol) and Tetrakis(triphenylphosphine)palladium(0) (15 mg, 10 % mol) as described in the general procedure for Suzuki-Miyaura reaction to afford compound **16** as a light red colour solid (24 mg, 42 %).  $^1\text{H NMR}$  (400 MHz,  $\text{CDCl}_3$ ):  $\delta$  = 8.48 (d,  $J$  = 2.0 Hz, 1H), 7.77 (dd,  $J$  = 7.5, 1.0 Hz, 1H), 7.59 - 7.66 (m, 1H), 7.49 - 7.56 (m, 2H), 7.42 - 7.46 (m, 1H), 7.17 - 7.25 (m, 4H), 6.90 (s, 1H), 6.67 (d,  $J$  = 8.0 Hz, 1H), 3.16 (s, 3H).  $^1\text{H NMR}$  (100 MHz,  $\text{CDCl}_3$ ):  $\delta$  = 195.1, 167.0, 144.6, 140.5, 139.7, 138.6, 135.0, 134.5, 133.3, 132.0, 130.6, 130.4, 130.05, 130.02, 128.8, 128.7, 128.0, 121.6, 115.3, 109.4, 26.2. HR-MS (ESI): Calcd.  $\text{C}_{23}\text{H}_{15}\text{BrClNO}_2$ ,  $[\text{M}+\text{H}]^+$   $m/z$ : 452.00475, found: 452.00447.

**3-[2-(4'-Chloro-biphenyl-2-yl)-2-oxo-eth-(Z)-ylidene]-1,5-dimethyl-1,3-dihydro-indol-2-one (2k):**

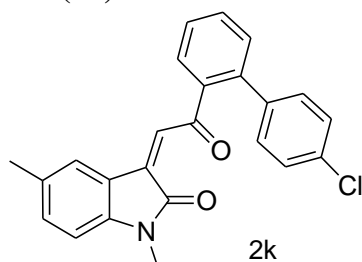

Compound **1f** (50 mg, 0.155 mmol) was treated with 1-chloro-4-iodobenzene (48 mg, 0.20 mmol),  $\text{NaHCO}_3$  (20 mg, 0.233 mmol) and Tetrakis(triphenylphosphine)palladium(0) (18 mg, 10 % mol) as described in the general procedure for Suzuki-Miyaura reaction to afford compound **16** as a light red colour solid (32 mg, 51 %).  $^1\text{H NMR}$  (400 MHz,  $\text{CDCl}_3$ ):  $\delta$  = 8.14 (s, 1H), 7.77 (dd,  $J$  = 7.8, 1.3 Hz, 1H), 7.57 - 7.63 (m, 1H), 7.48 - 7.55 (m, 1H), 7.43 (dd,  $J$  = 7.5, 1.0 Hz, 1H), 7.17 - 7.25 (m, 5H), 6.91 (s, 1H), 6.67 (d,  $J$  = 8.0 Hz, 1H), 3.15 (s, 3H), 2.35 (s, 3H).  $^1\text{H NMR}$  (100 MHz,  $\text{CDCl}_3$ ):  $\delta$  = 195.5, 167.6, 143.7, 140.4, 140.0, 138.7, 135.1, 134.2, 133.0, 132.1, 131.6, 130.4, 130.0, 128.9, 128.7, 128.6, 128.0, 127.9, 120.0, 107.8, 26.1, 21.0. HR-MS (ESI): Calcd.  $\text{C}_{24}\text{H}_{18}\text{ClNO}_2$ ,  $[\text{M}+\text{H}]^+$   $m/z$ : 388.10985, found: 388.11021.

# MKA-CI-ISA-M

16/05/2014 14:32:16

|                                    |                      |                                 |                                                          |                               |                      |
|------------------------------------|----------------------|---------------------------------|----------------------------------------------------------|-------------------------------|----------------------|
| <b>OriginalDateForRelativeTime</b> | 2014-04-03T22:09:12  | <b>Multiplets Integrals Sum</b> | 25.25                                                    | <b>Number of Nuclei</b>       | 26 H's               |
| <b>Acquisition Time (sec)</b>      | 5.3084               | <b>Comment</b>                  | MKA-CI-ISA-P/DMSO                                        | <b>Date</b>                   | 03 Apr 2014 22:09:12 |
| <b>Date Stamp</b>                  | 03 Apr 2014 22:09:12 | <b>File Name</b>                | C:\Users\kkth216\Desktop\NMR-300\MKA-CI-ISA-P1\PDATA\11r |                               |                      |
| <b>Frequency (MHz)</b>             | 300.13               | <b>Nucleus</b>                  | 1H                                                       | <b>Number of Transients</b>   | 126                  |
| <b>Original Points Count</b>       | 32768                | <b>Owner</b>                    | administrator                                            | <b>Points Count</b>           | 32768                |
| <b>Receiver Gain</b>               | 1625.50              | <b>SW(cyclical) (Hz)</b>        | 6172.84                                                  | <b>Solvent</b>                | DMSO-d6              |
| <b>Spectrum Type</b>               | STANDARD             | <b>Sweep Width (Hz)</b>         | 6172.65                                                  | <b>Temperature (degree C)</b> | 25.000               |
|                                    |                      |                                 |                                                          | <b>Spectrum Offset (Hz)</b>   | 1853.3636            |

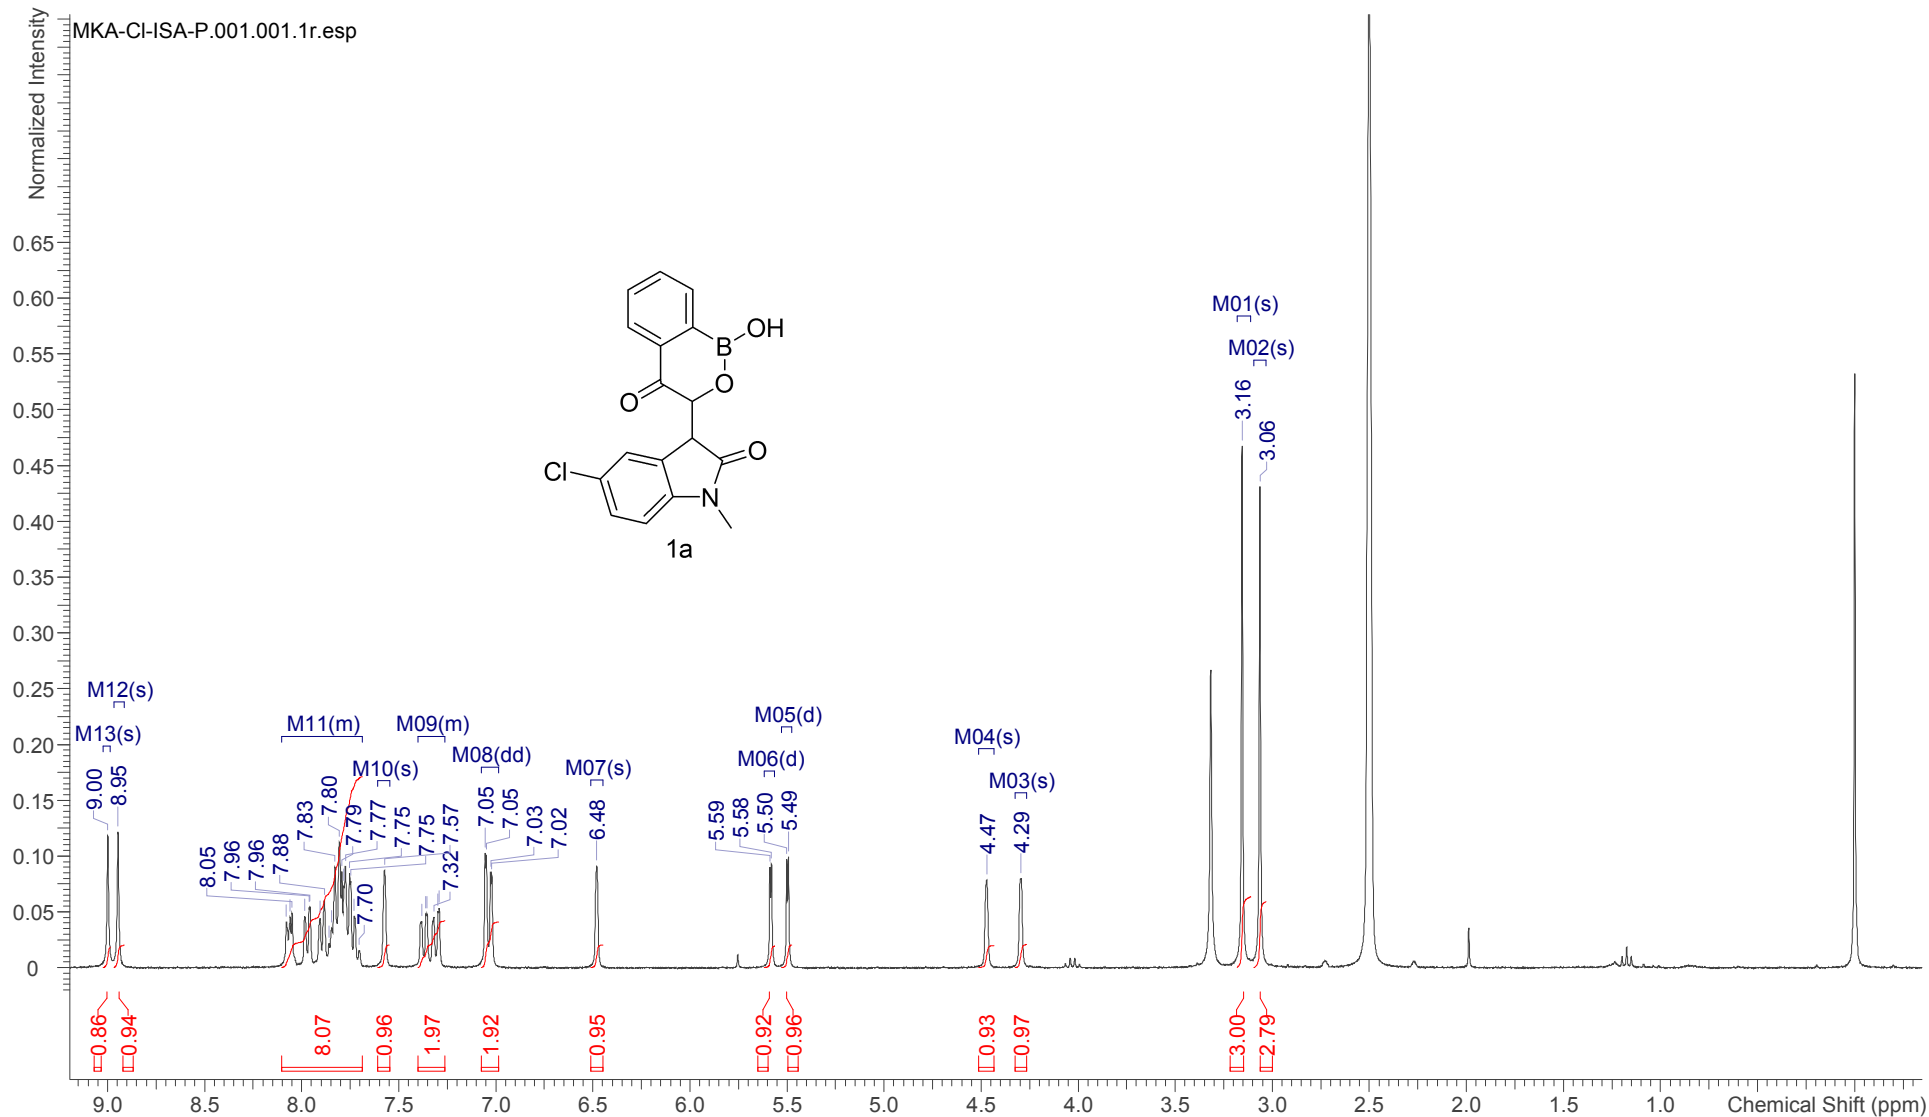

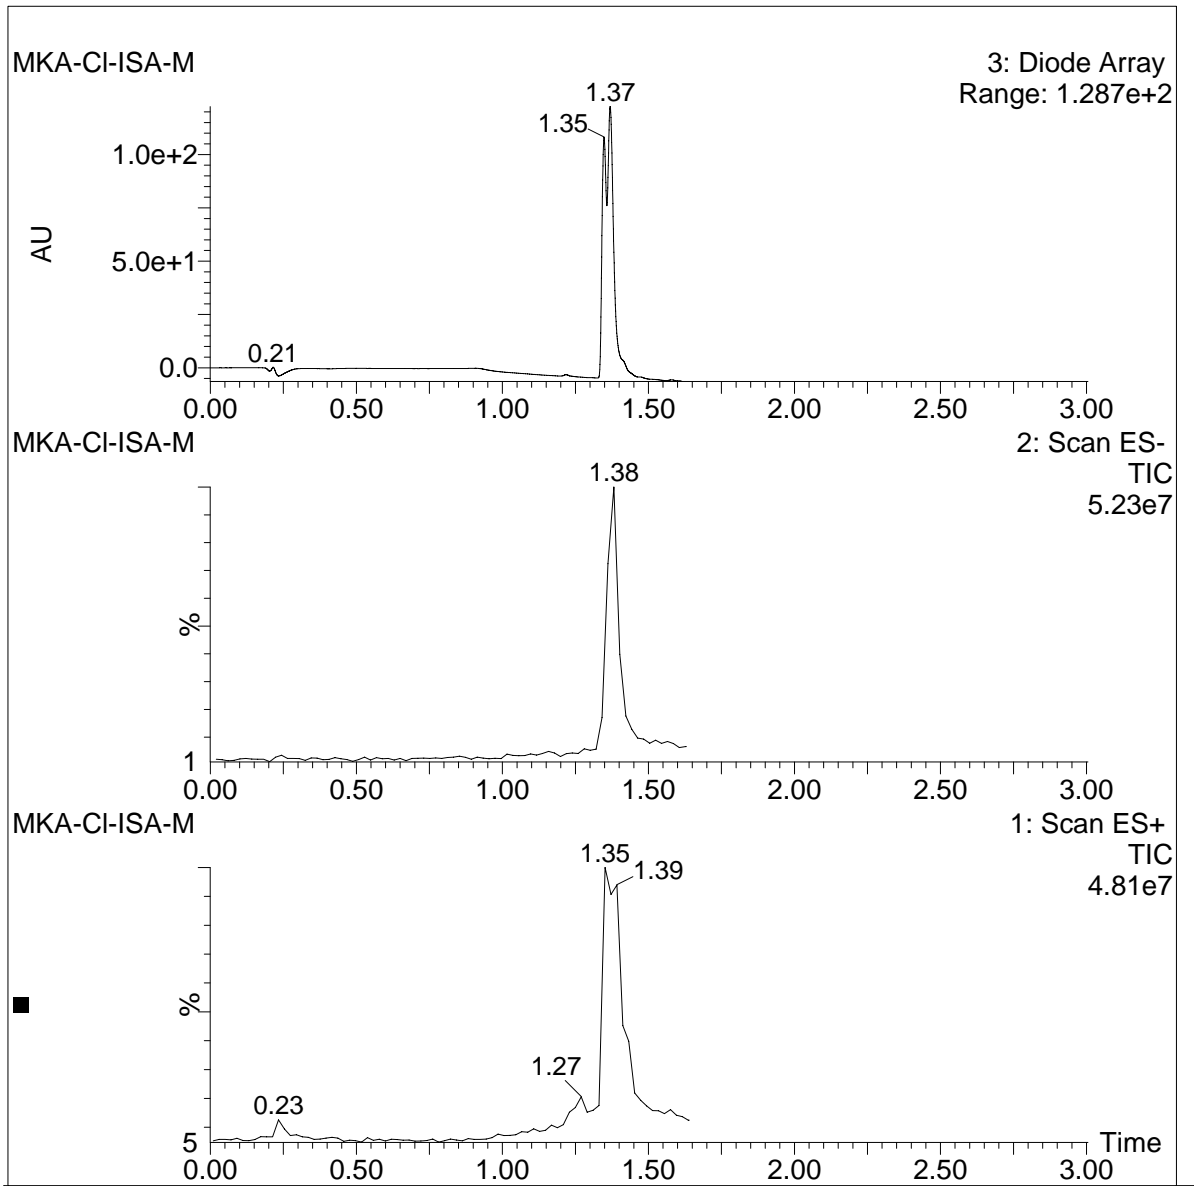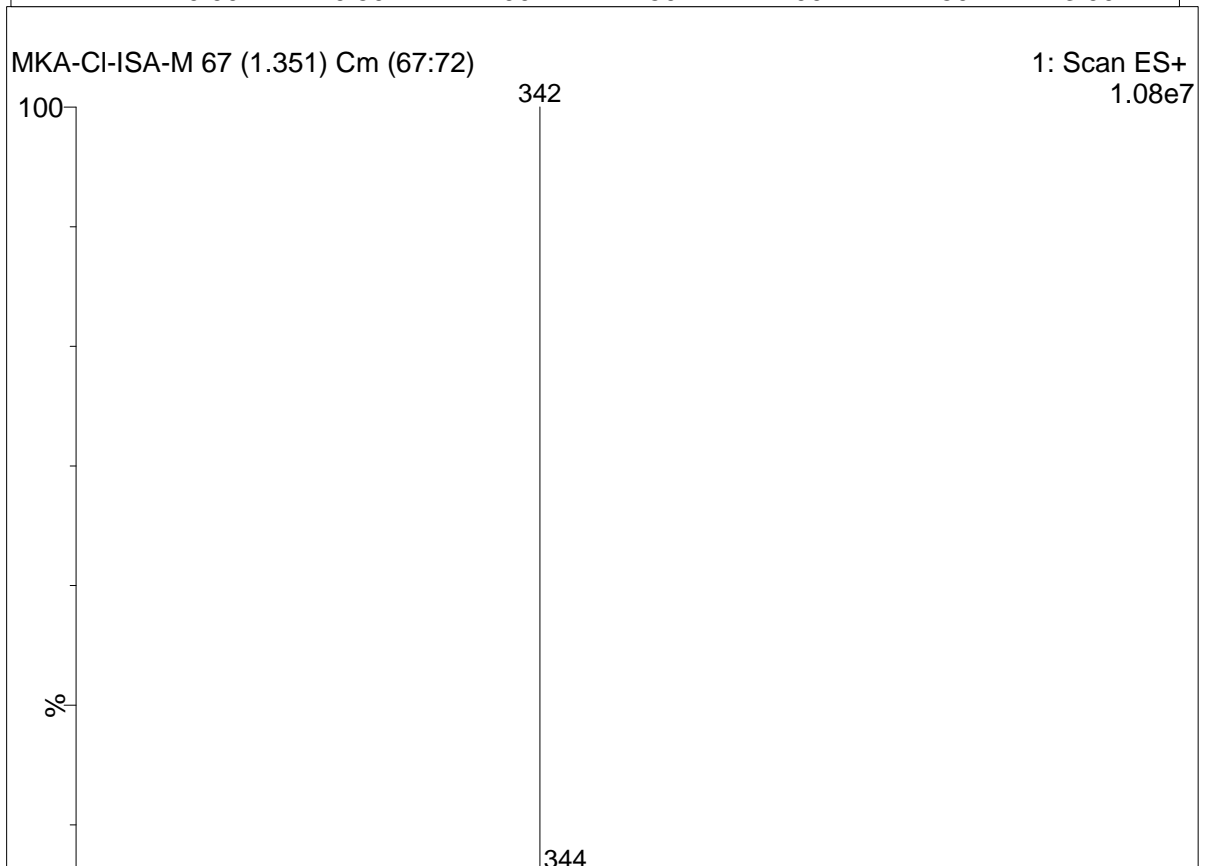

# MKA-CI-ISA-P1

15/05/2014 17:06:39

|                                                                 |                                                                           |                                       |                                   |                                |  |
|-----------------------------------------------------------------|---------------------------------------------------------------------------|---------------------------------------|-----------------------------------|--------------------------------|--|
| <b>OriginalDateForRelativeTime</b> 2014-05-10T16:27:52          |                                                                           | <b>Multiplets Integrals Sum</b> 12.81 |                                   | <b>Number of Nuclei</b> 13 H's |  |
| <b>Acquisition Time (sec)</b> 3.1719                            | <b>Comment</b> MKA-CI-ISA-01P PROTON DMSO {F:\ecm\DATA\2014-05} bionmr 44 |                                       |                                   |                                |  |
| <b>Date</b> 10 May 2014 16:27:52                                | <b>Date Stamp</b> 10 May 2014 16:27:52                                    |                                       |                                   |                                |  |
| <b>File Name</b> \\inbgrdsfp01\indata\MKA\KANNAN-4\1\PDATA\1\1r | <b>Frequency (MHz)</b> 500.13                                             | <b>Nucleus</b> 1H                     |                                   |                                |  |
| <b>Number of Transients</b> 16                                  | <b>Origin</b> spect                                                       | <b>Original Points Count</b> 32768    | <b>Owner</b> administrator        |                                |  |
| <b>Points Count</b> 32768                                       | <b>Pulse Sequence</b> zg30                                                | <b>Receiver Gain</b> 4.00             | <b>SW(cyclical) (Hz)</b> 10330.58 |                                |  |
| <b>Solvent</b> DMSO-d6                                          | <b>Spectrum Offset (Hz)</b> 3091.9285                                     | <b>Spectrum Type</b> STANDARD         | <b>Sweep Width (Hz)</b> 10330.26  |                                |  |
| <b>Temperature (degree C)</b> 25.000                            |                                                                           |                                       |                                   |                                |  |

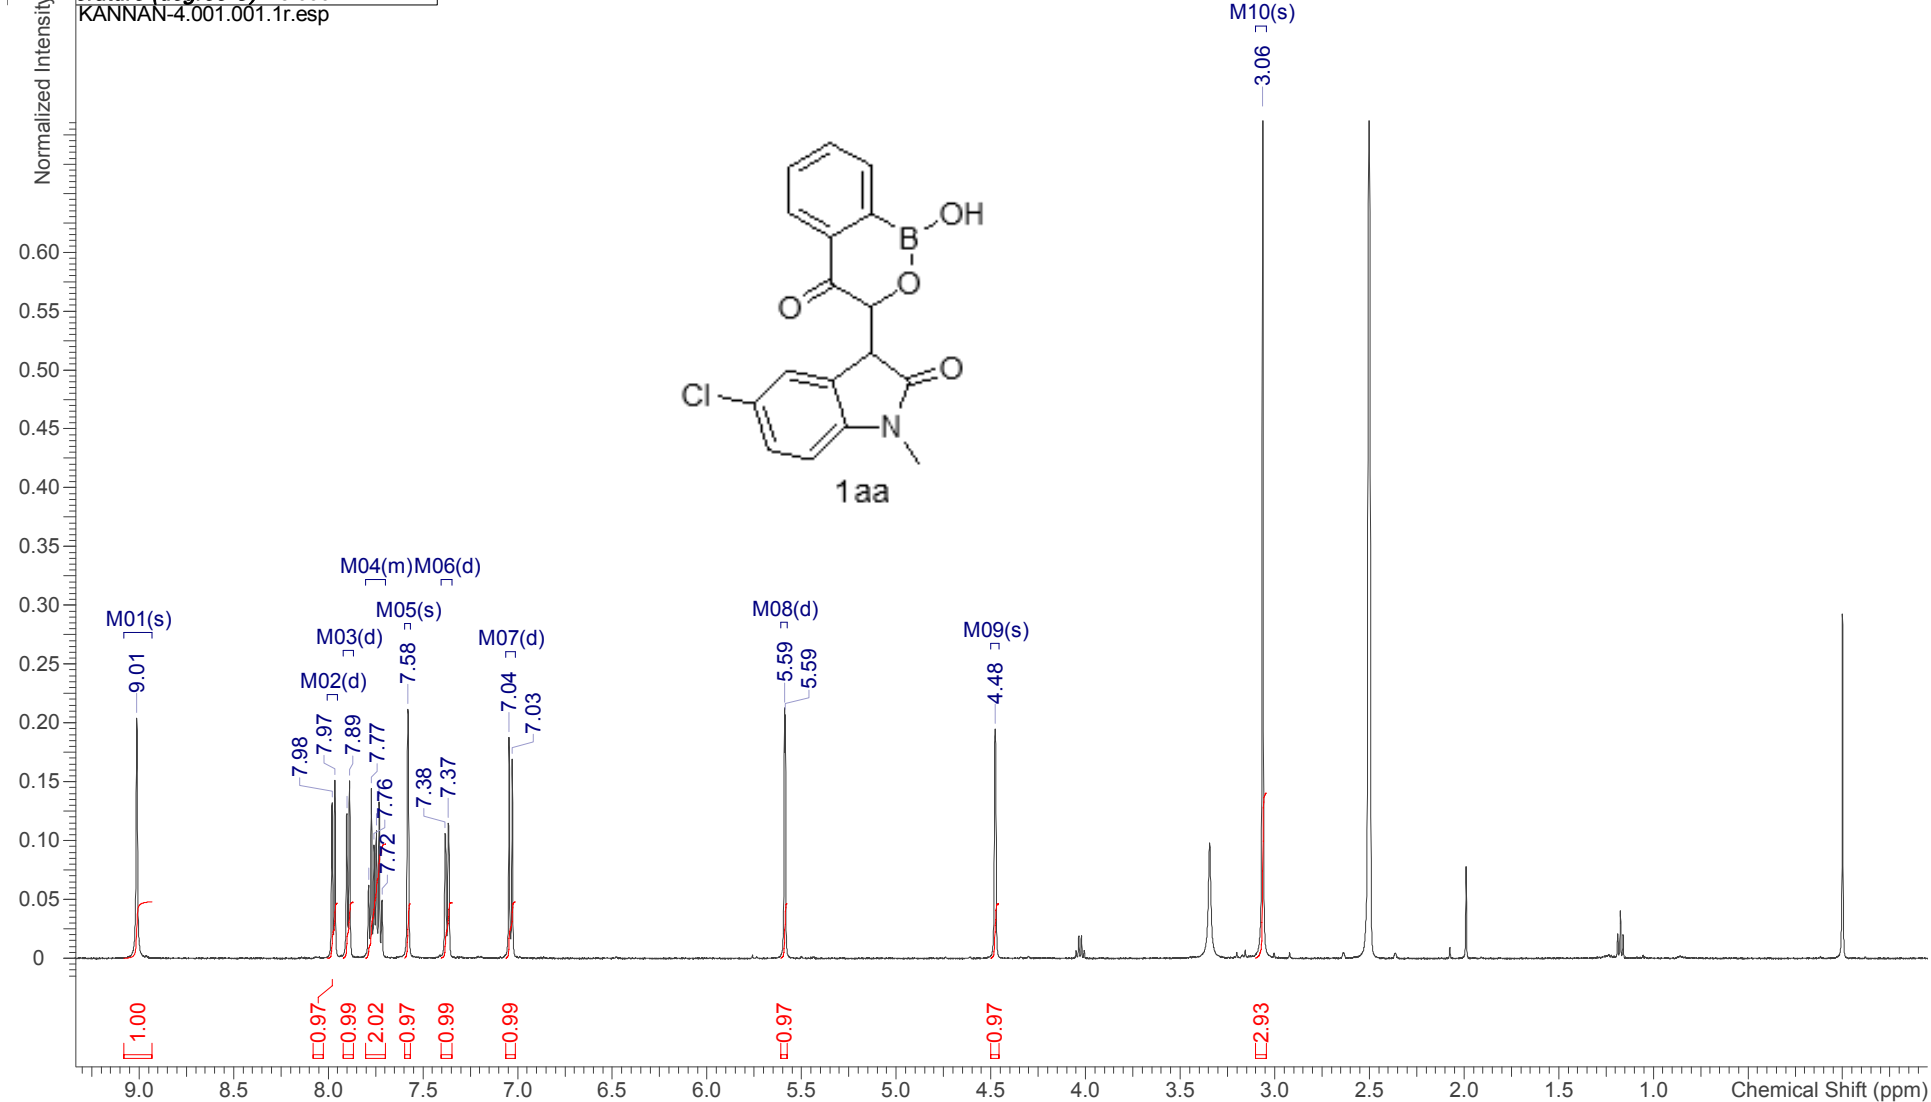

## MKA-CI-ISA-P2

21/06/2014 12:24:01

|                                                 |                      |                               |                                                |                        |         |                      |            |
|-------------------------------------------------|----------------------|-------------------------------|------------------------------------------------|------------------------|---------|----------------------|------------|
| OriginalDateForRelativeTime 2014-05-10T21:45:44 |                      | Multiplets Integrals Sum 0.00 |                                                | Number of Nuclei 0 C's |         |                      |            |
| Acquisition Time (sec)                          | 1.0912               | Comment                       | C13CPD DMSO (F:\ecmi\DATA\2014-05) bionmr 44   |                        | Date    | 10 May 2014 21:45:44 |            |
| Date Stamp                                      | 10 May 2014 21:45:44 | File Name                     | \\inbgrd\sp01\elndata\MKA\KANNAN-42\PDATA\1\1r |                        |         |                      |            |
| Frequency (MHz)                                 | 125.77               | Nucleus                       | 13C                                            | Number of Transients   | 6000    | Origin               | spect      |
| Original Points Count                           | 32768                | Owner                         | administrator                                  | Points Count           | 32768   | Pulse Sequence       | zgpg30     |
| Receiver Gain                                   | 32768.00             | SW(cyclical) (Hz)             | 30030.03                                       | Solvent                | DMSO-d6 | Spectrum Offset (Hz) | 12518.3826 |
| Spectrum Type                                   | STANDARD             | Sweep Width (Hz)              | 30029.11                                       | Temperature (degree C) | 25.000  |                      |            |

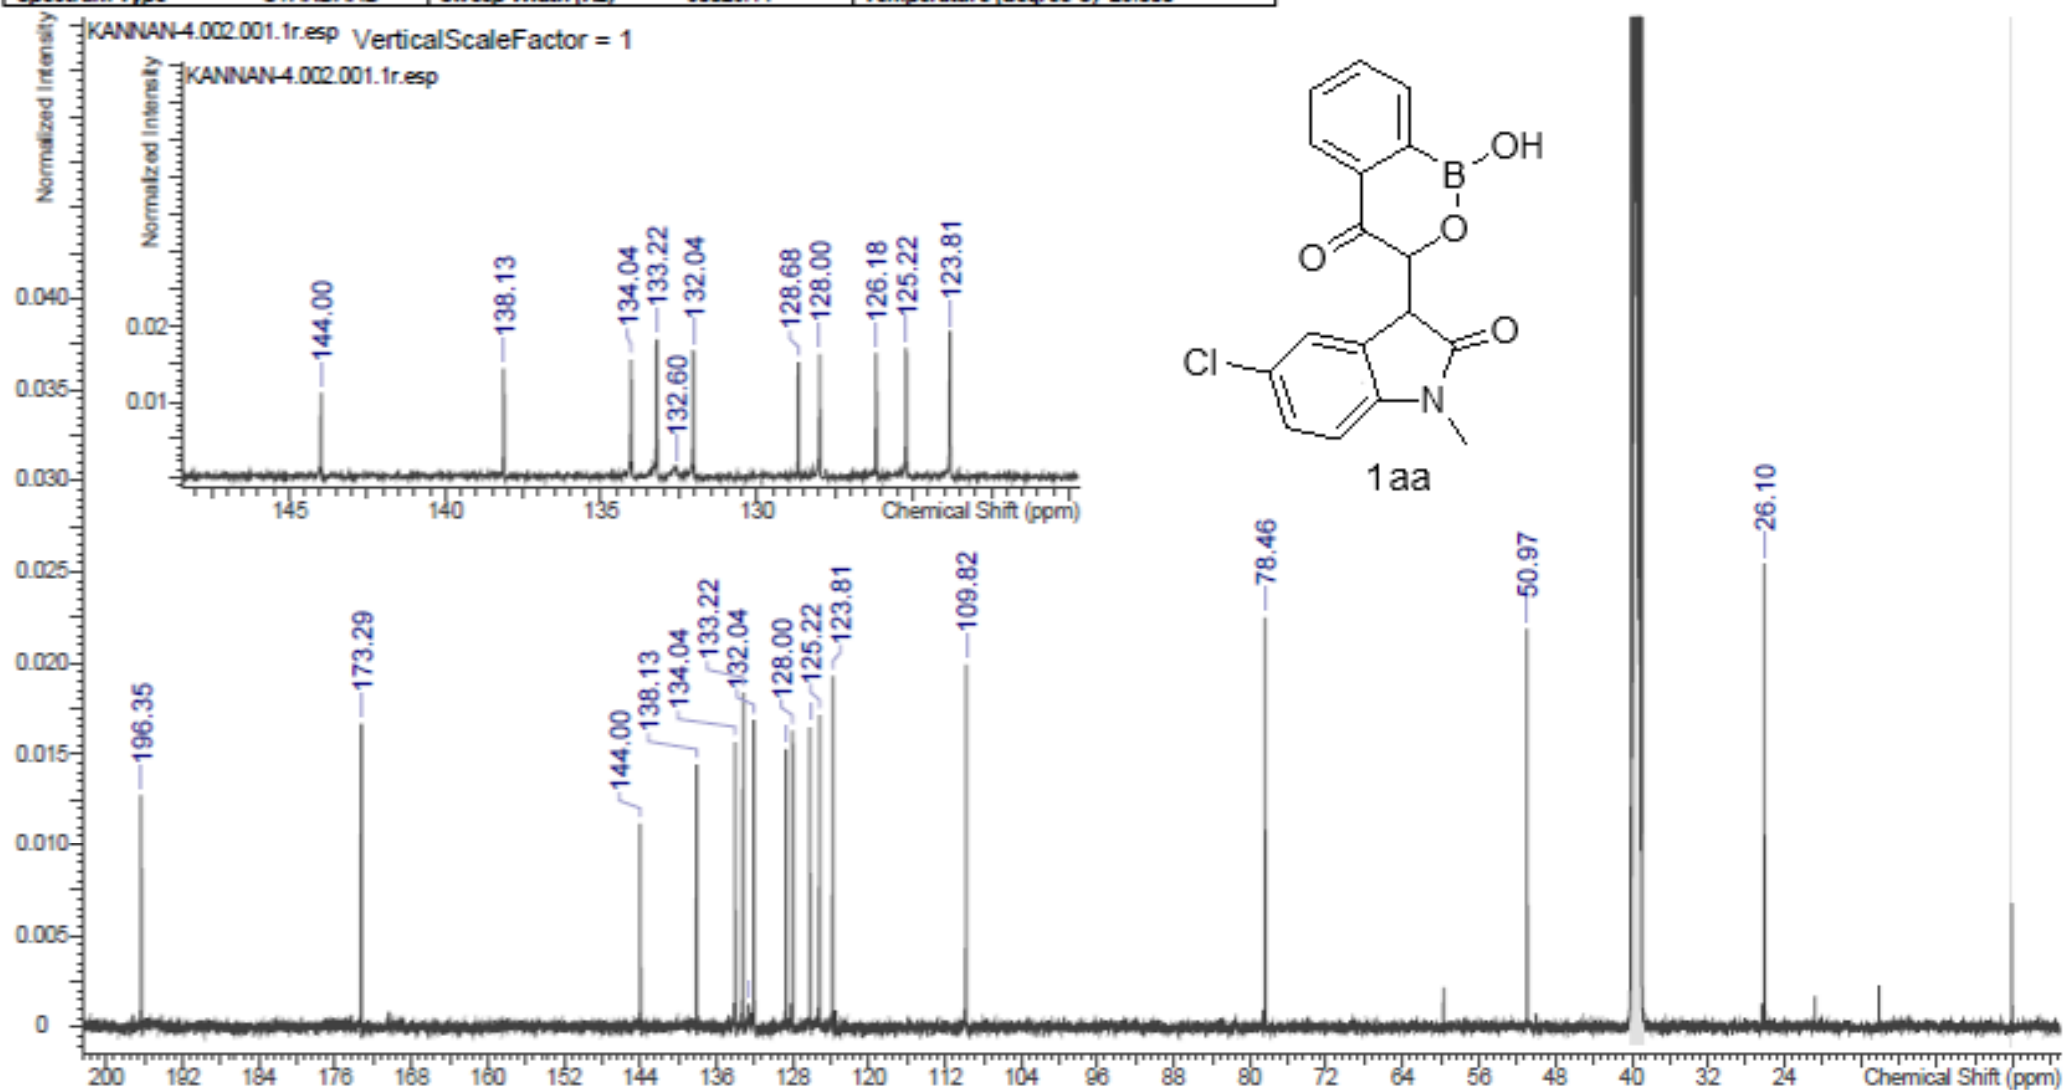





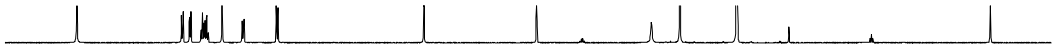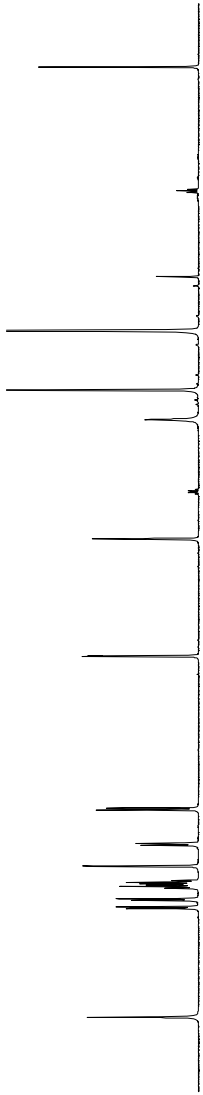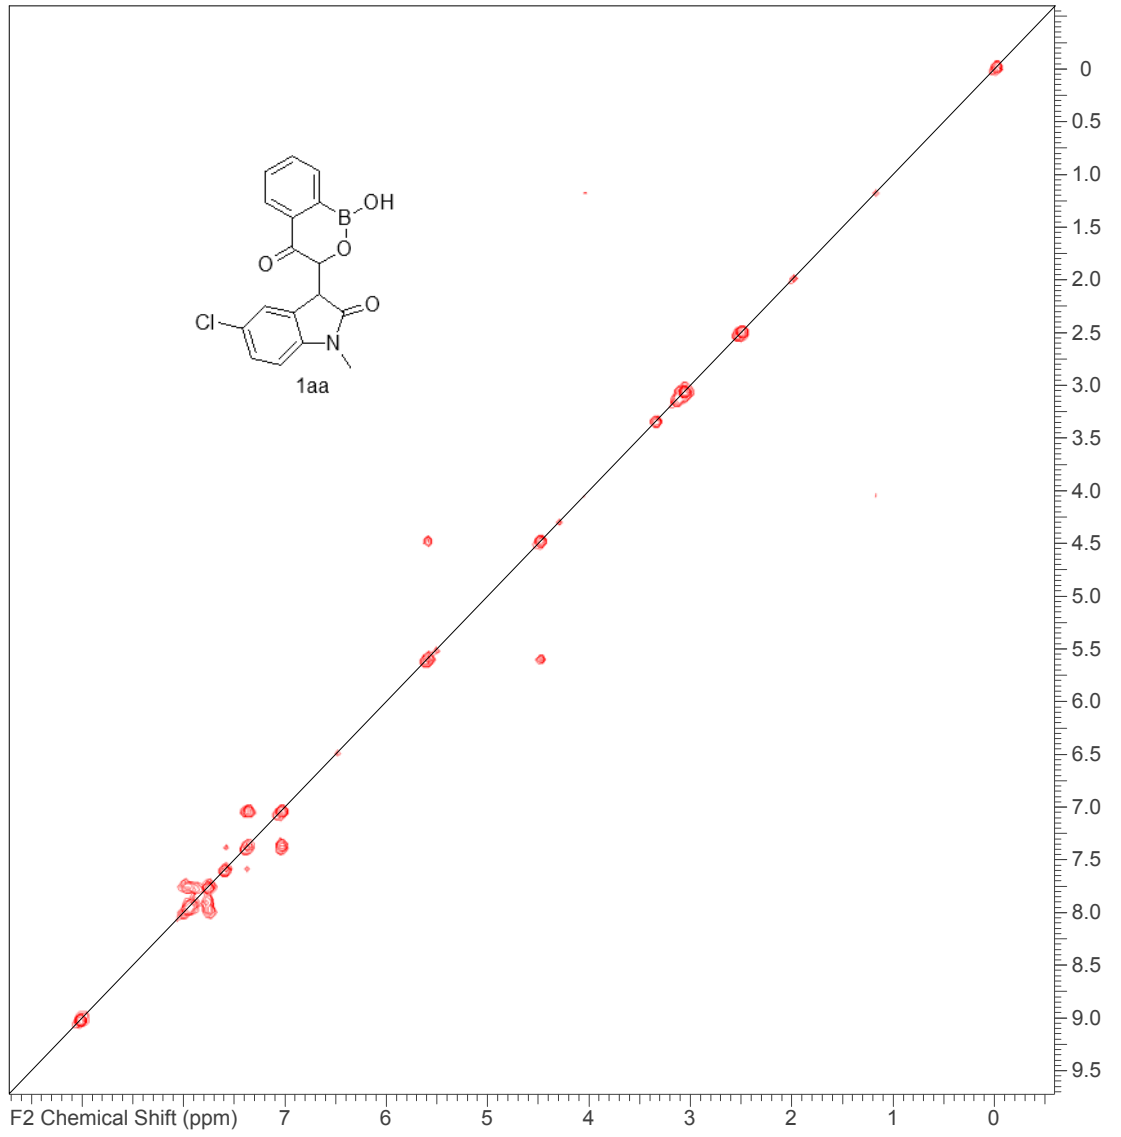

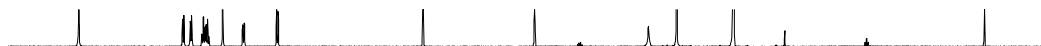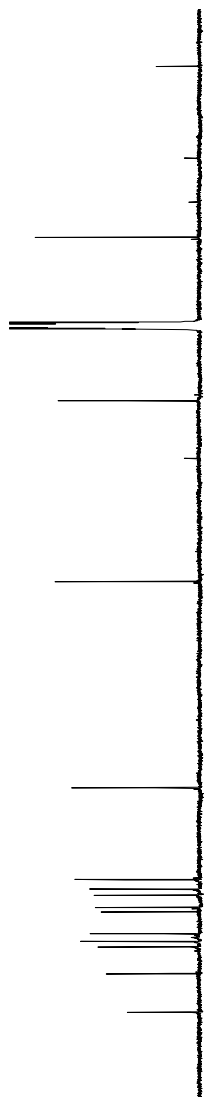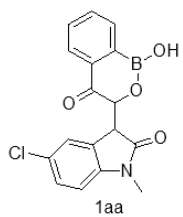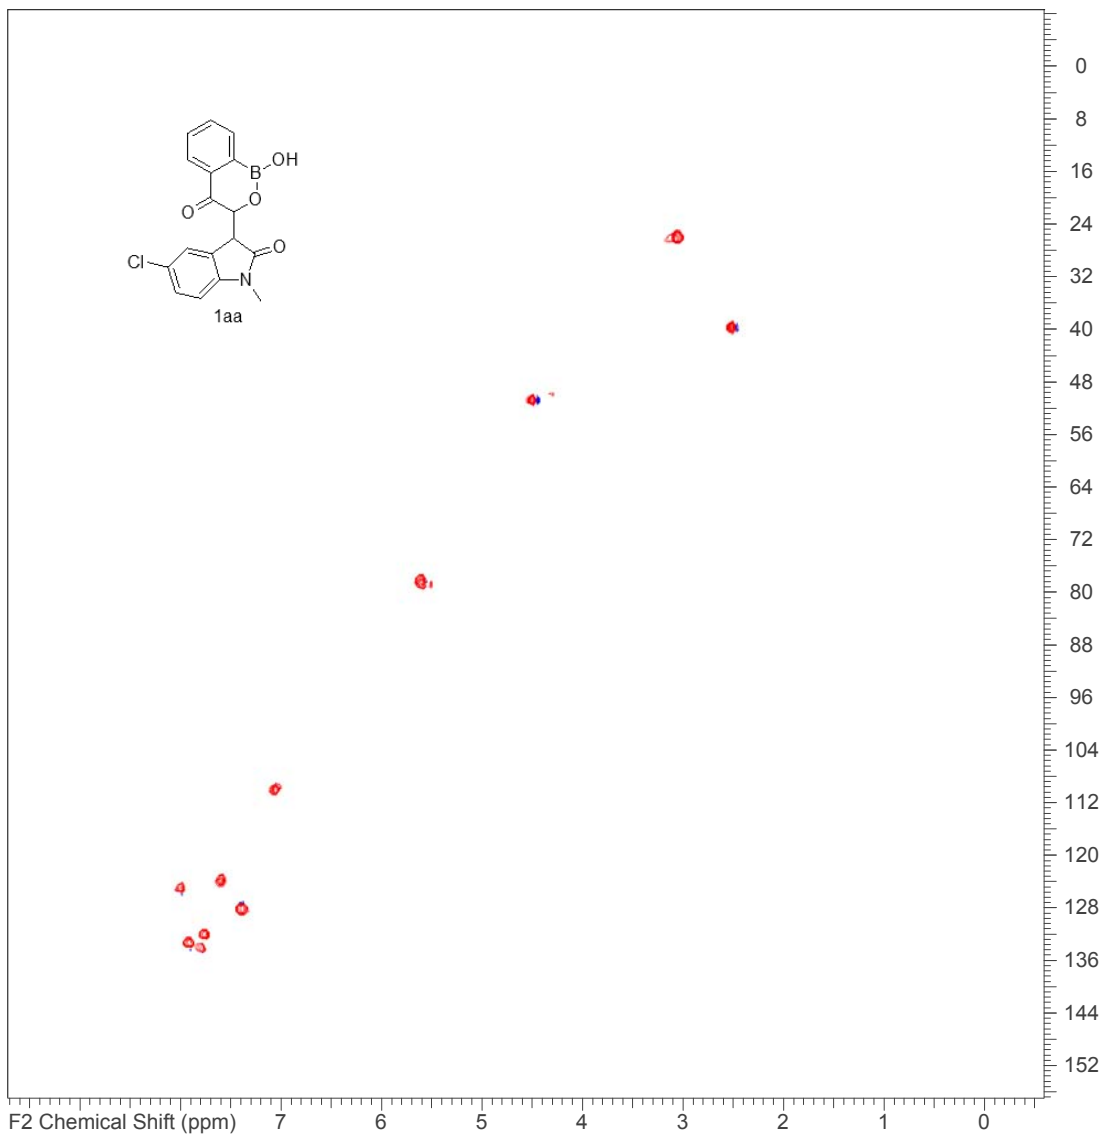

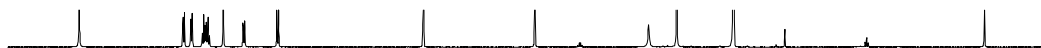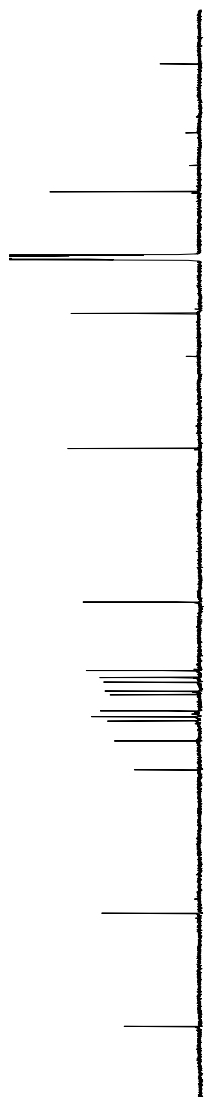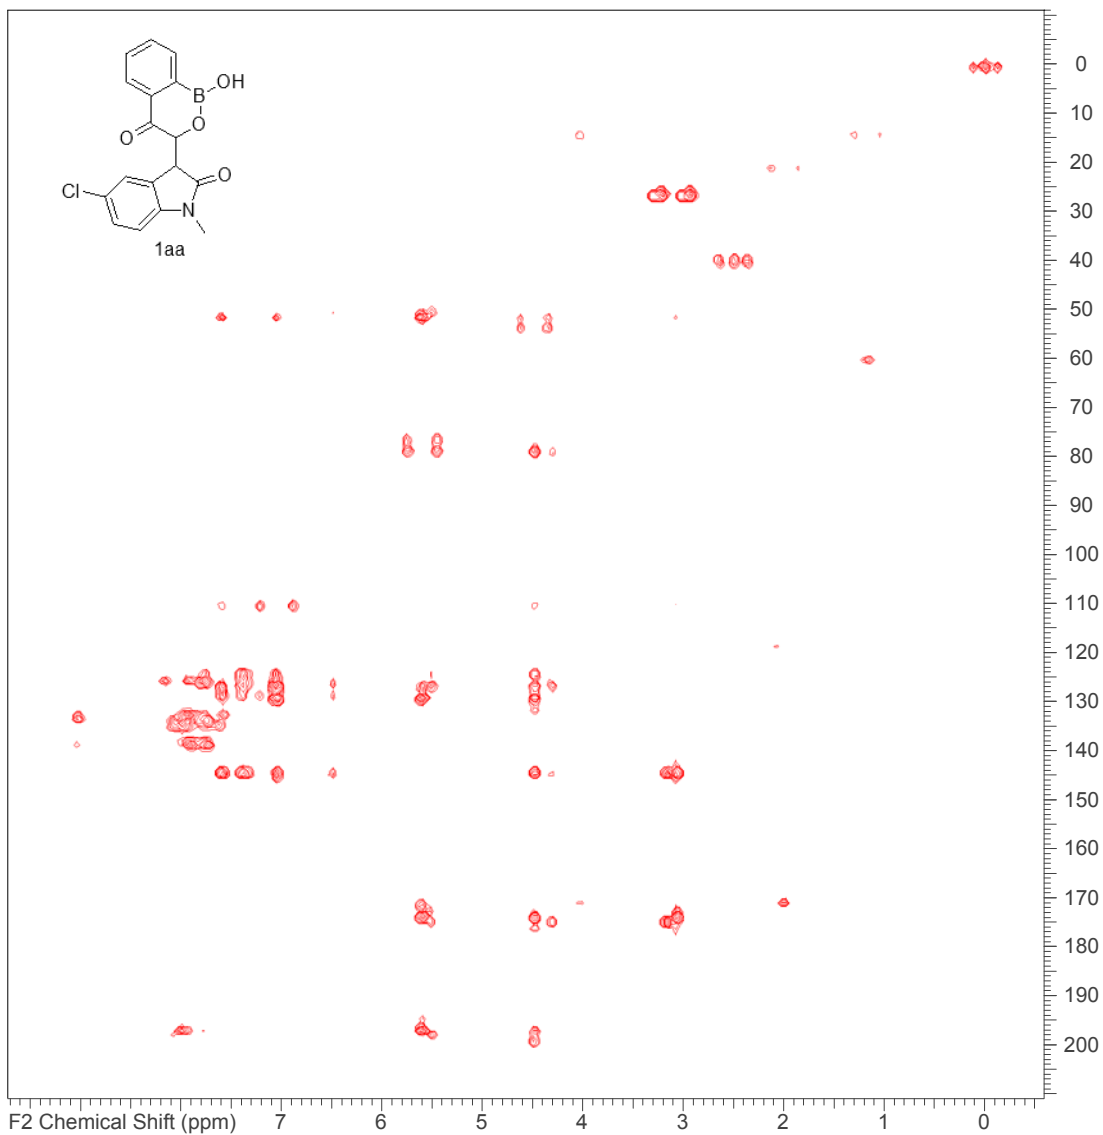

# MKA-CI-ISA-P2

15/05/2014 12:59:34

|                                                        |                                                                  |                                       |                                       |                                |  |
|--------------------------------------------------------|------------------------------------------------------------------|---------------------------------------|---------------------------------------|--------------------------------|--|
| <b>OriginalDateForRelativeTime</b> 2014-05-05T09:48:56 |                                                                  | <b>Multiplets Integrals Sum</b> 13.16 |                                       | <b>Number of Nuclei</b> 13 H's |  |
| <b>Acquisition Time (sec)</b> 3.1719                   | <b>Comment</b> PROTON DMSO {F:\ecm\DATA\2014-05} bionmr 41       | <b>Date</b> 05 May 2014 09:48:56      |                                       |                                |  |
| <b>Date Stamp</b> 05 May 2014 09:48:56                 | <b>File Name</b> \\inbgrdsfp01\elndata\MKA\KANNAN-1\1\PDATA\1\1r |                                       |                                       |                                |  |
| <b>Frequency (MHz)</b> 500.13                          | <b>Nucleus</b> 1H                                                | <b>Number of Transients</b> 16        | <b>Origin</b> spect                   |                                |  |
| <b>Original Points Count</b> 32768                     | <b>Owner</b> administrator                                       | <b>Points Count</b> 32768             | <b>Pulse Sequence</b> zg30            |                                |  |
| <b>Receiver Gain</b> 4.00                              | <b>SW(cyclical) (Hz)</b> 10330.58                                | <b>Solvent</b> DMSO-d6                | <b>Spectrum Offset (Hz)</b> 3090.4678 |                                |  |
| <b>Spectrum Type</b> STANDARD                          | <b>Sweep Width (Hz)</b> 10330.26                                 | <b>Temperature (degree C)</b> 25.000  |                                       |                                |  |

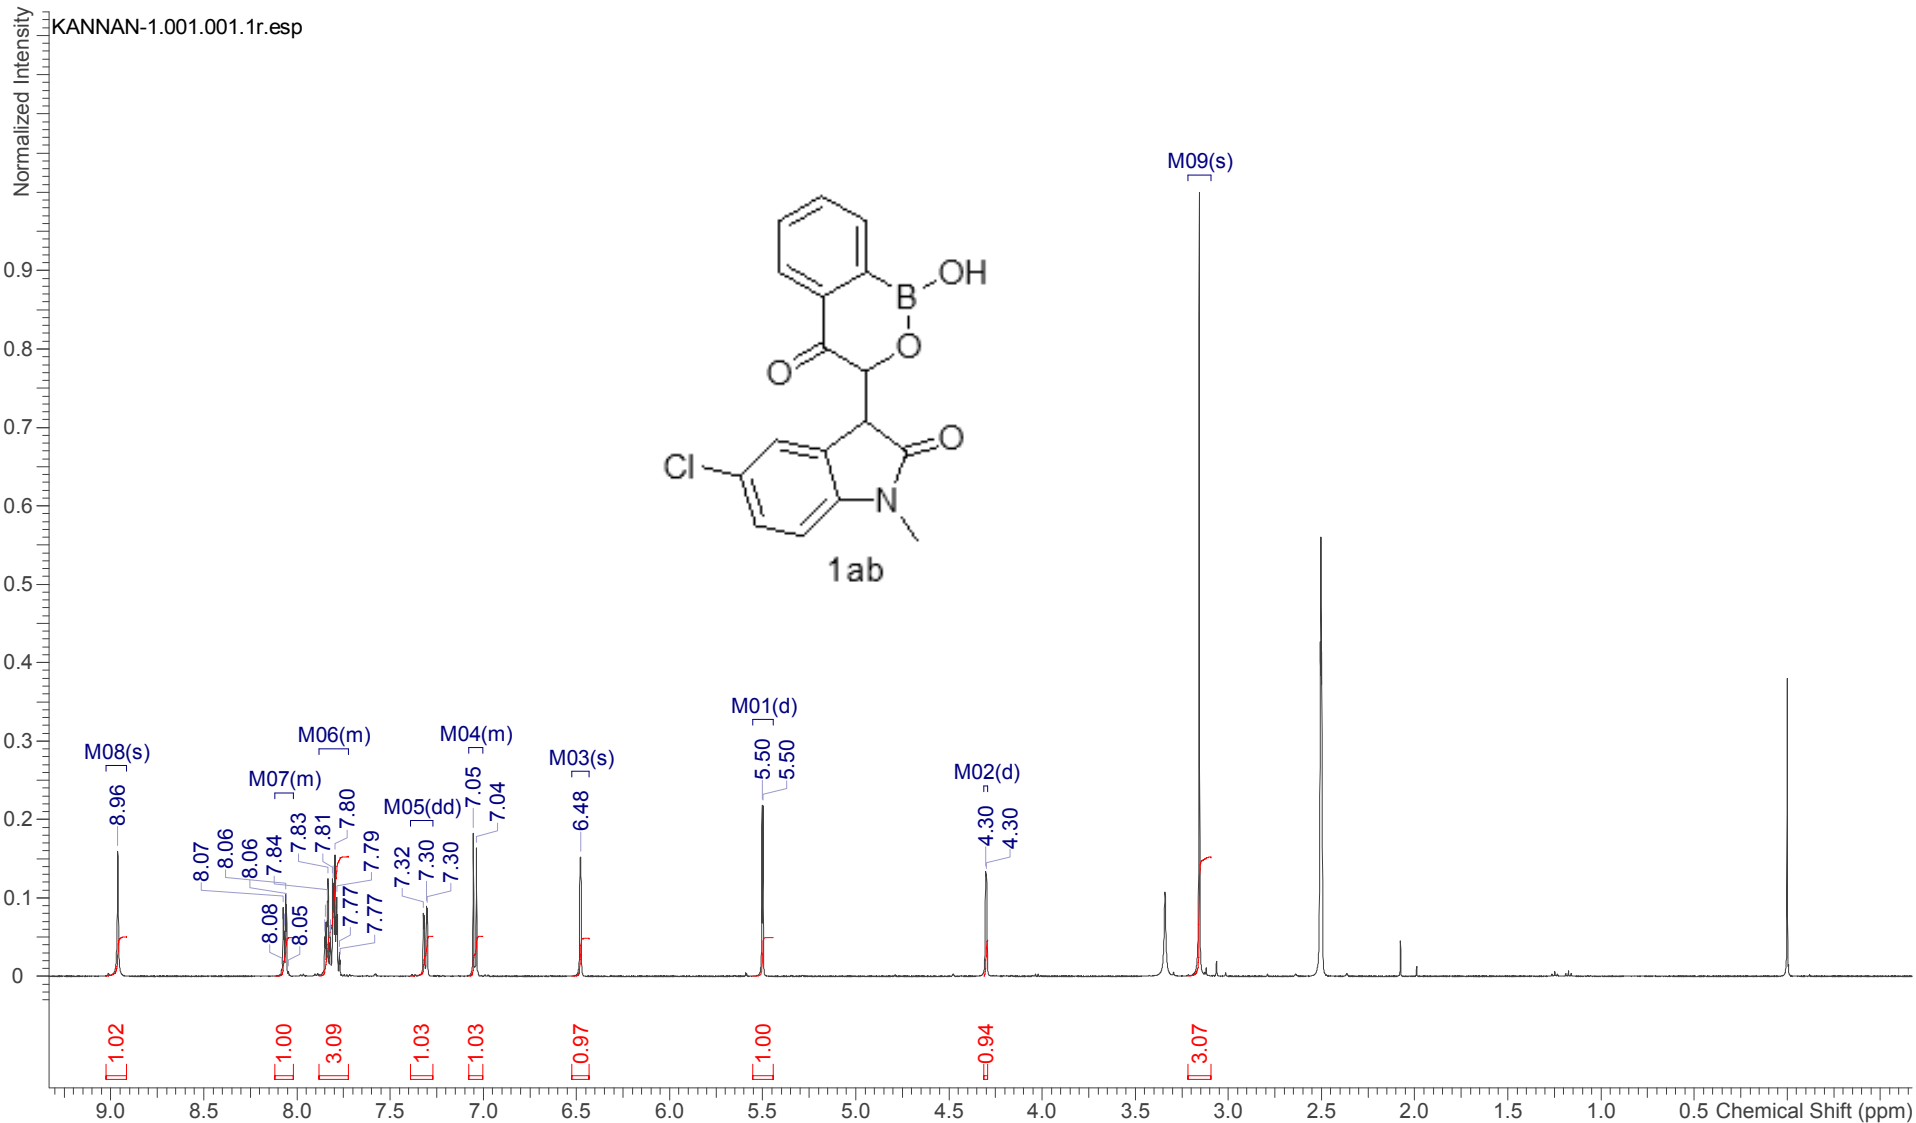

# MKA-CI-ISA-P1

21/06/2014 12:12:57

|                                                 |                      |                               |                                                  |                        |         |                      |            |
|-------------------------------------------------|----------------------|-------------------------------|--------------------------------------------------|------------------------|---------|----------------------|------------|
| OriginalDateForRelativeTime 2014-05-05T16:59:52 |                      | Multiplets Integrals Sum 0.00 |                                                  | Number of Nuclei 0 C's |         |                      |            |
| Acquisition Time (sec)                          | 1.0912               | Comment                       | C13CPD DMSO (F:\ecm\DATA\2014-05) bionmr 41      |                        | Date    | 05 May 2014 16:59:52 |            |
| Date Stamp                                      | 05 May 2014 16:59:52 | File Name                     | \\inbgrdsfp01\elndata\MKA\KANNAN-1\2\PDATA\1\11r |                        |         |                      |            |
| Frequency (MHz)                                 | 125.77               | Nucleus                       | 13C                                              | Number of Transients   | 8192    | Origin               | spect      |
| Original Points Count                           | 32768                | Owner                         | administrator                                    | Points Count           | 32768   | Pulse Sequence       | zgpg30     |
| Receiver Gain                                   | 32768.00             | SW(cyclical) (Hz)             | 30030.03                                         | Solvent                | DMSO-d6 | Spectrum Offset (Hz) | 12518.3026 |
| Spectrum Type                                   | STANDARD             | Sweep Width (Hz)              | 30029.11                                         | Temperature (degree C) | 25.000  |                      |            |

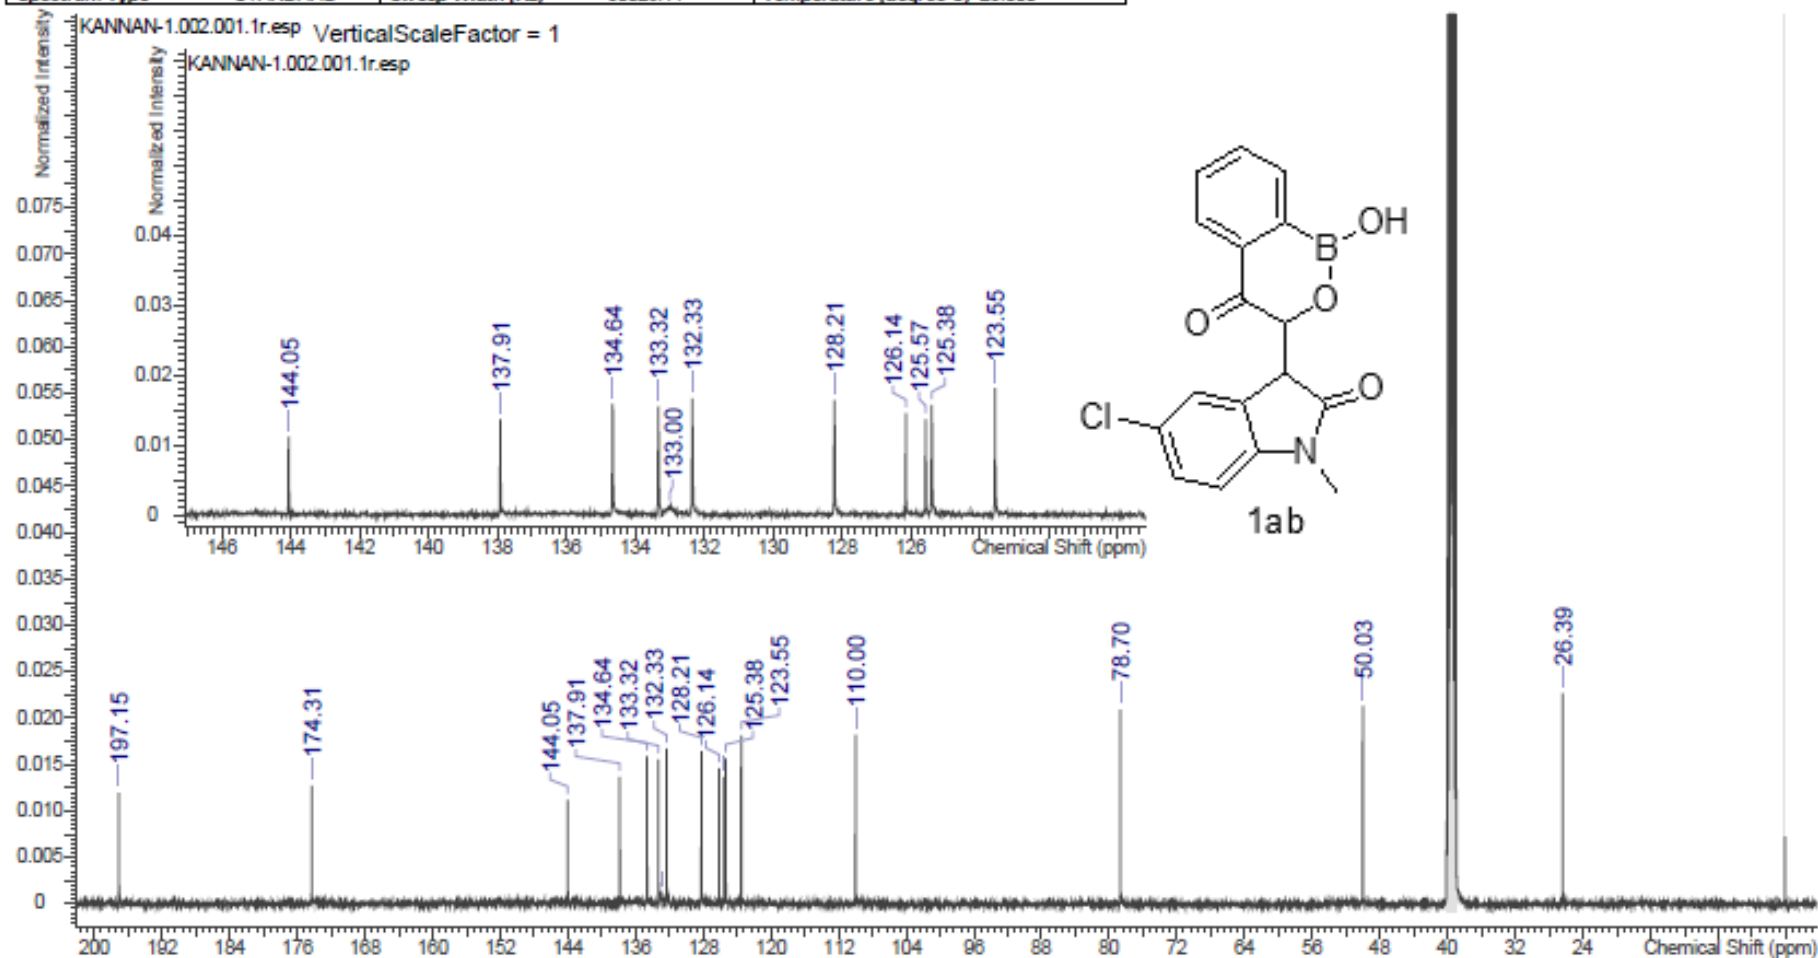

|                                                        |                                                                                      |                                      |                                    |                                  |  |
|--------------------------------------------------------|--------------------------------------------------------------------------------------|--------------------------------------|------------------------------------|----------------------------------|--|
| <b>OriginalDateForRelativeTime</b> 2014-05-13T14:00:40 |                                                                                      | <b>Multiplets Integrals Sum</b> 0.00 |                                    | <b>Number of Nuclei</b> 0 B's    |  |
| <b>Acquisition Time (sec)</b> 0.8503                   | <b>Comment</b> MKA-BORON-2                                                           |                                      |                                    | <b>Date</b> 13 May 2014 14:00:40 |  |
| <b>Date Stamp</b> 13 May 2014 14:00:40                 | <b>File Name</b> \\inbglab176164\ECM_2014\MKA\data\iMED\nmr\MKA-BORON-2\1\PDATA\1\1r |                                      |                                    |                                  |  |
| <b>Frequency (MHz)</b> 96.29                           | <b>Nucleus</b> 11B                                                                   | <b>Number of Transients</b> 1024     | <b>Origin</b> av300                |                                  |  |
| <b>Original Points Count</b> 32768                     | <b>Owner</b> administrator                                                           | <b>Points Count</b> 32768            | <b>Pulse Sequence</b> zg           |                                  |  |
| <b>Receiver Gain</b> 5160.60                           | <b>SW(cyclical) (Hz)</b> 38535.64                                                    | <b>Solvent</b> DMSO-d6               | <b>Spectrum Offset (Hz)</b> 0.0038 |                                  |  |
| <b>Spectrum Type</b> STANDARD                          | <b>Sweep Width (Hz)</b> 38534.47                                                     | <b>Temperature (degree C)</b> 25.000 |                                    |                                  |  |

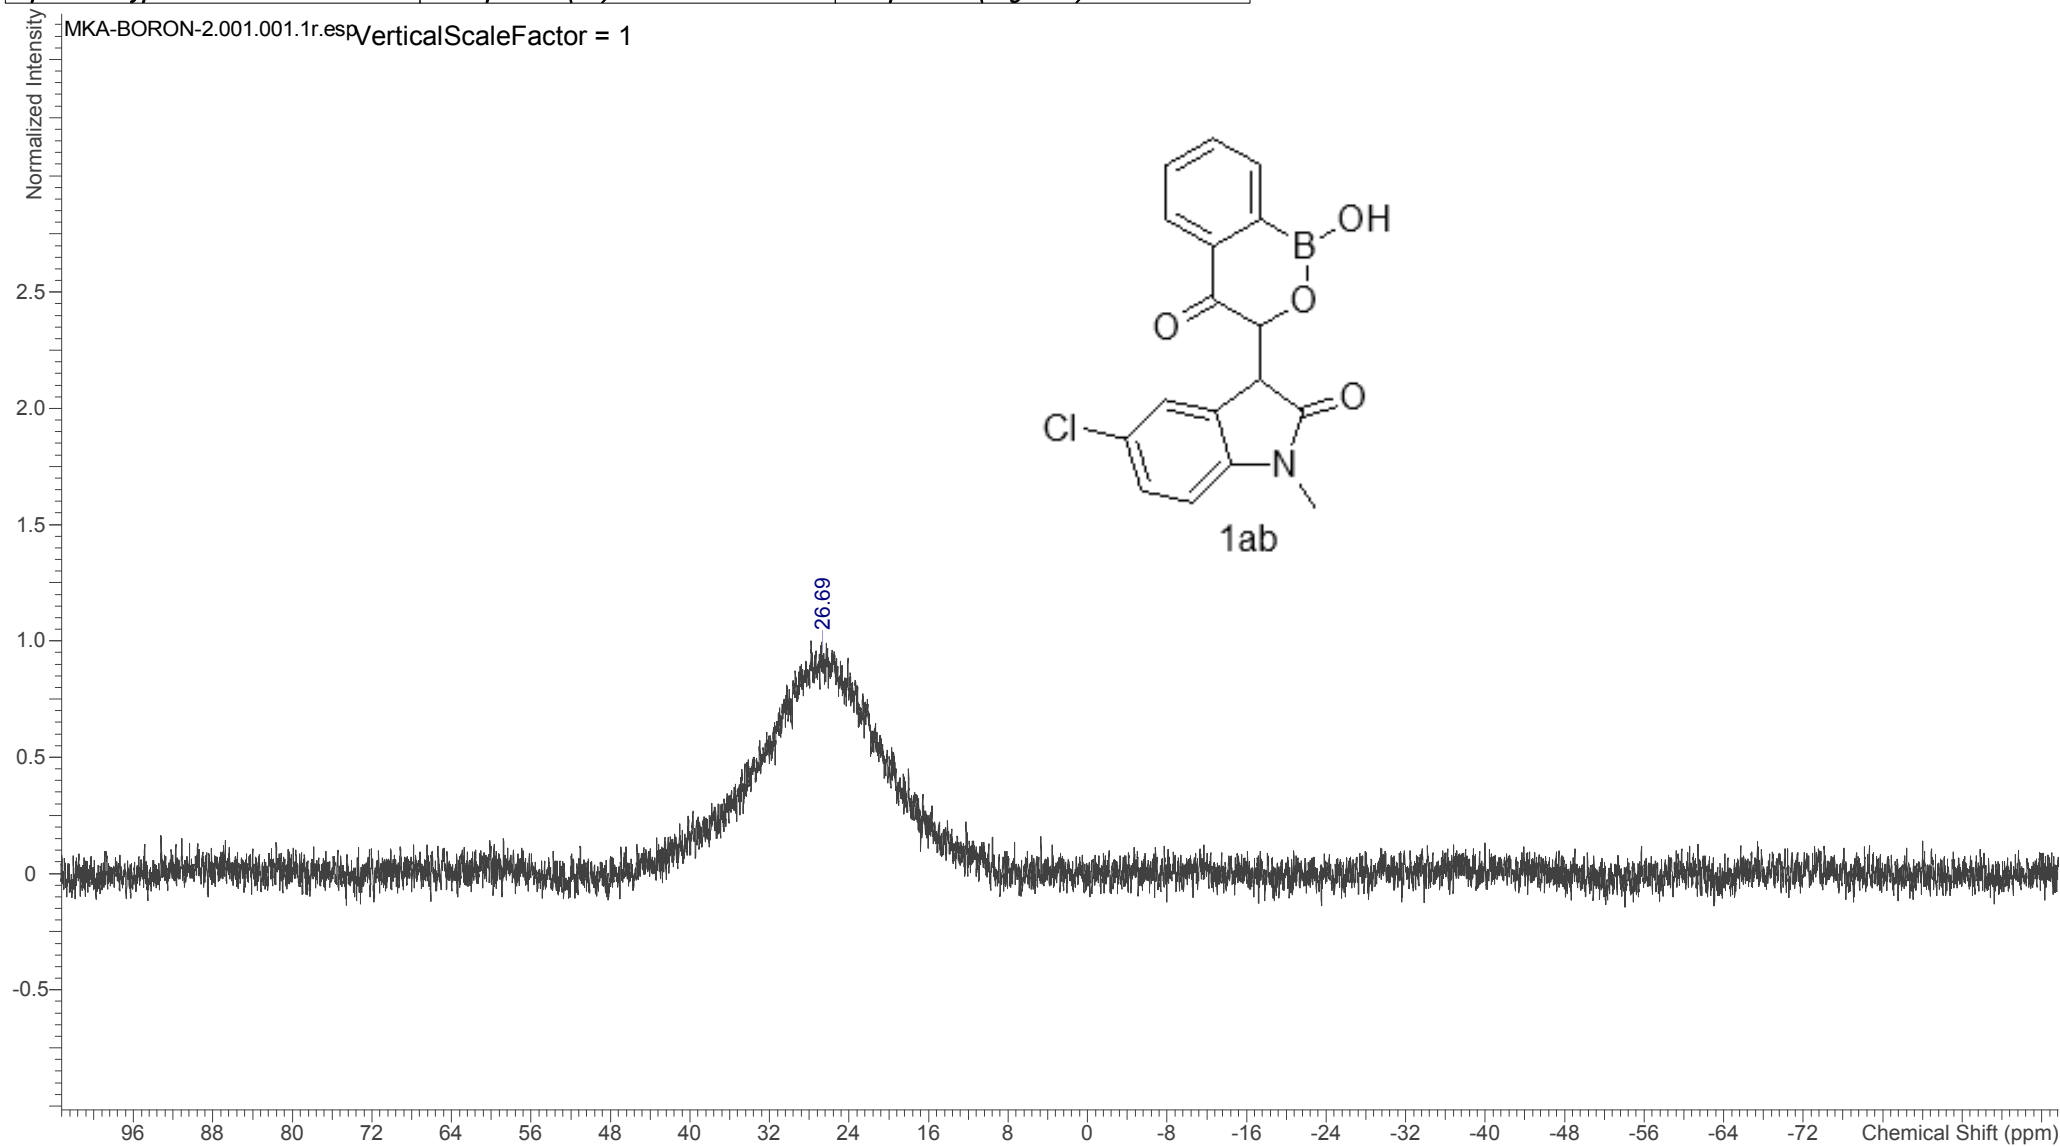

KANNAN-1.003.001.2rr.esp

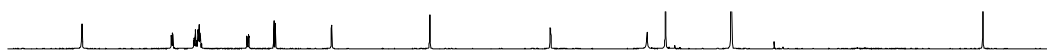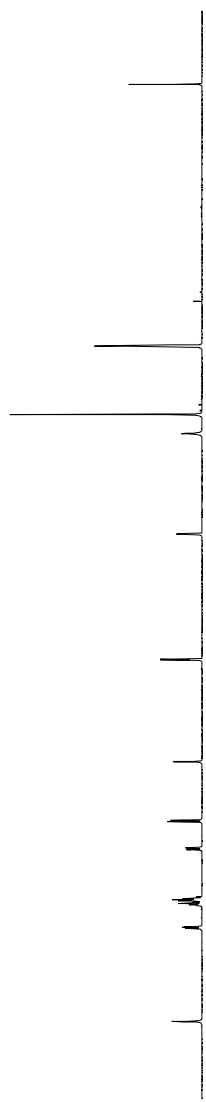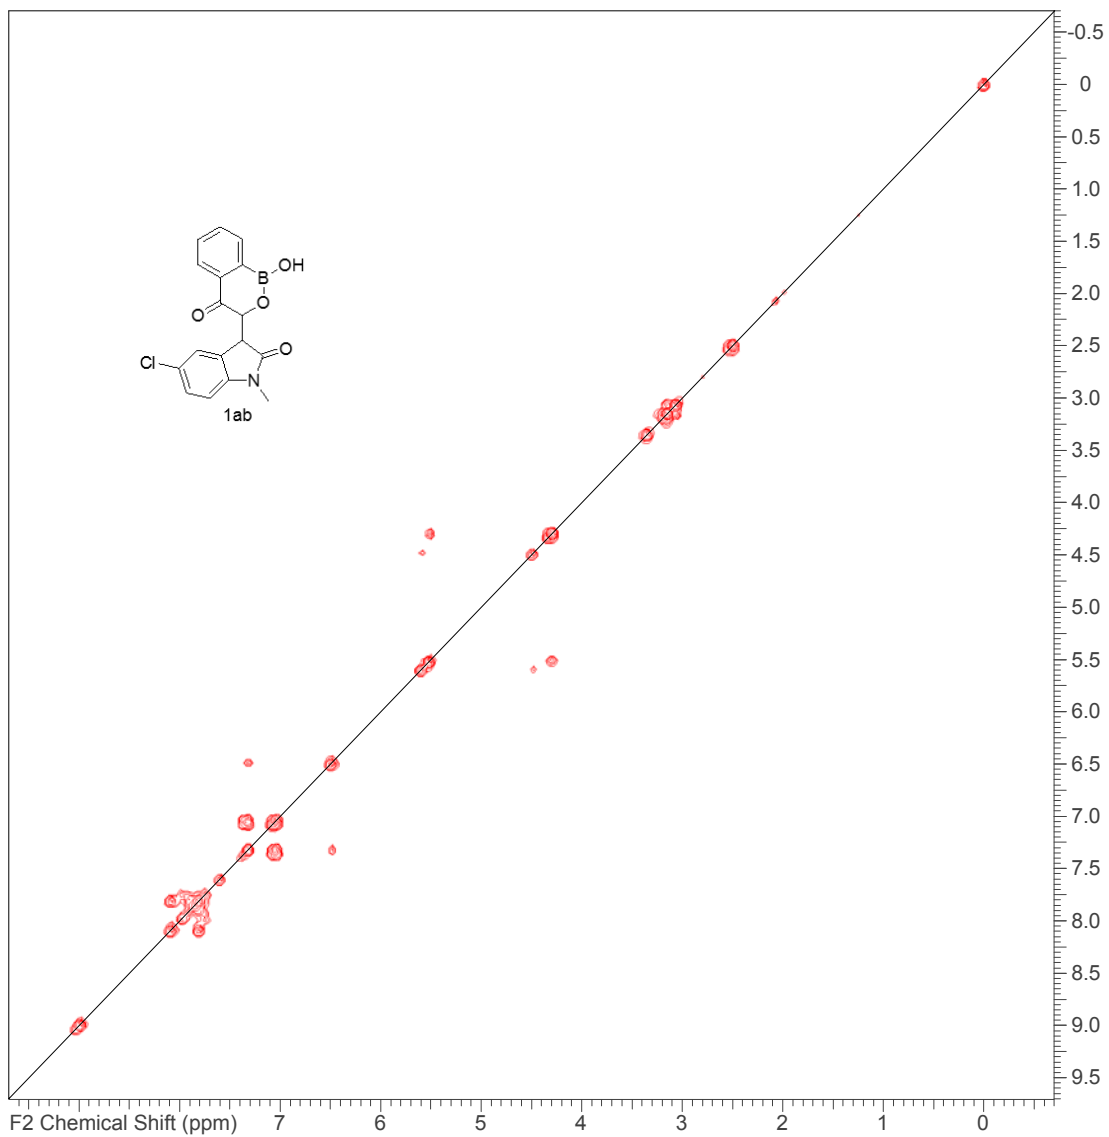

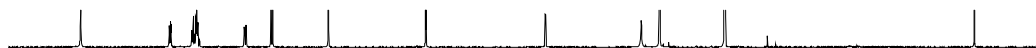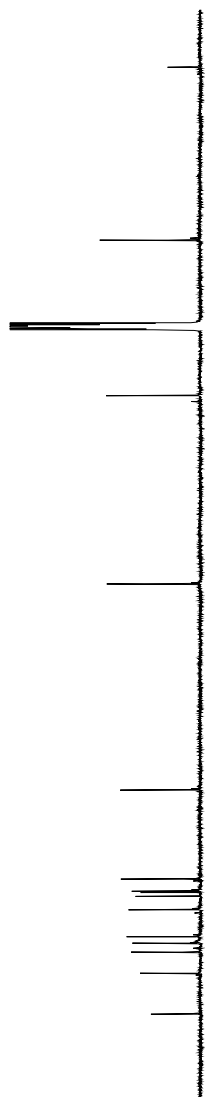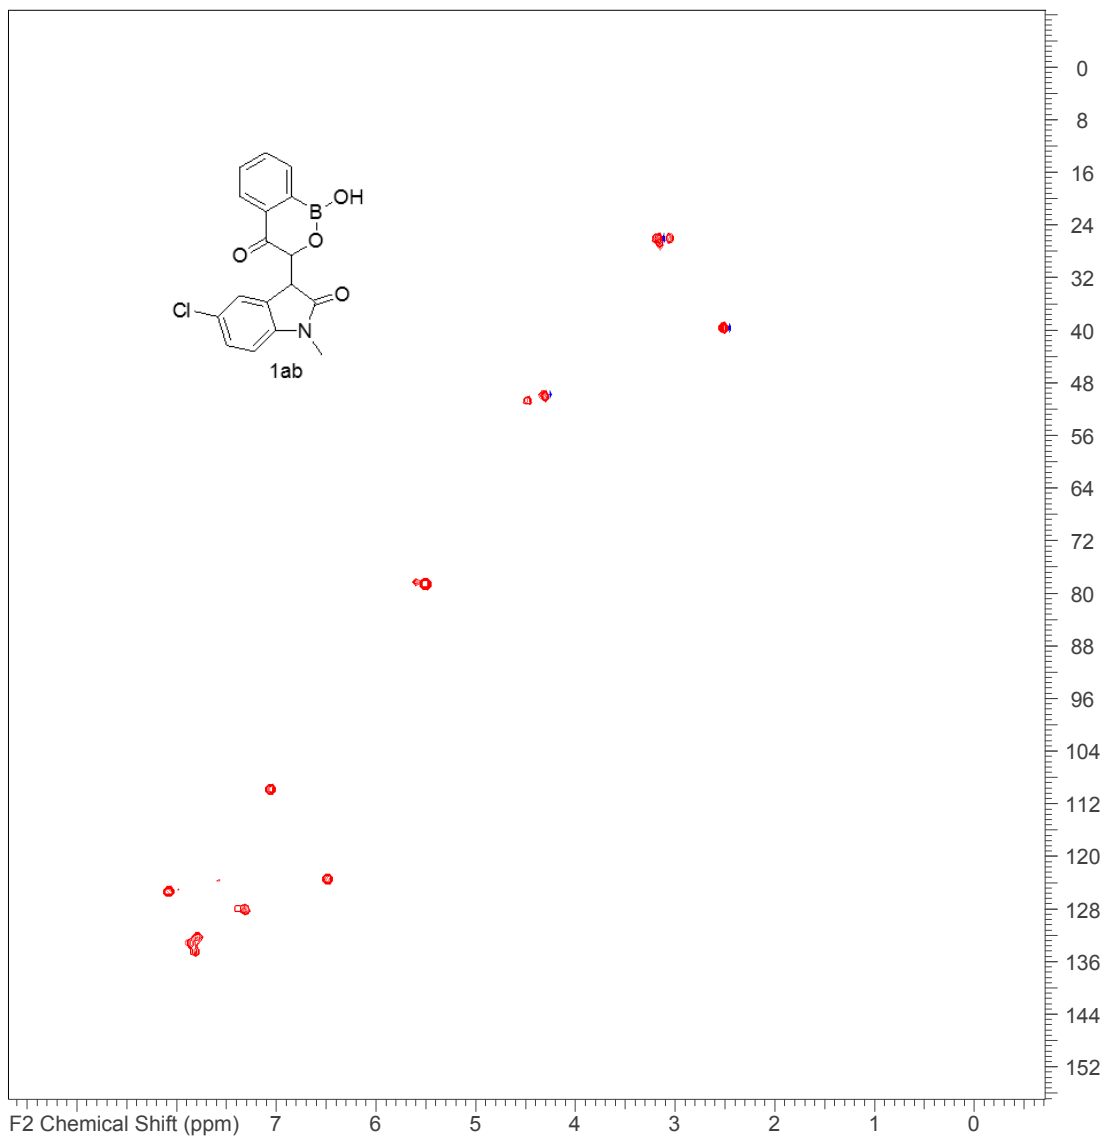



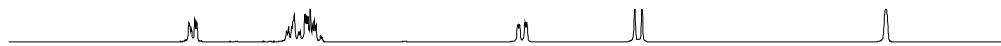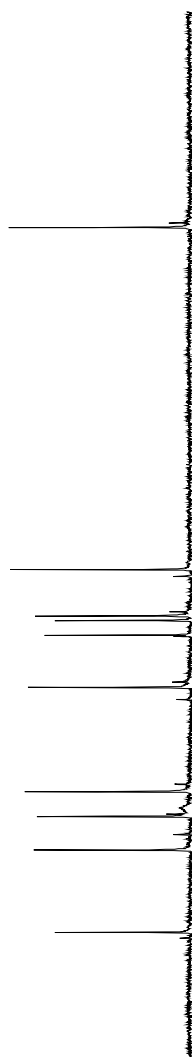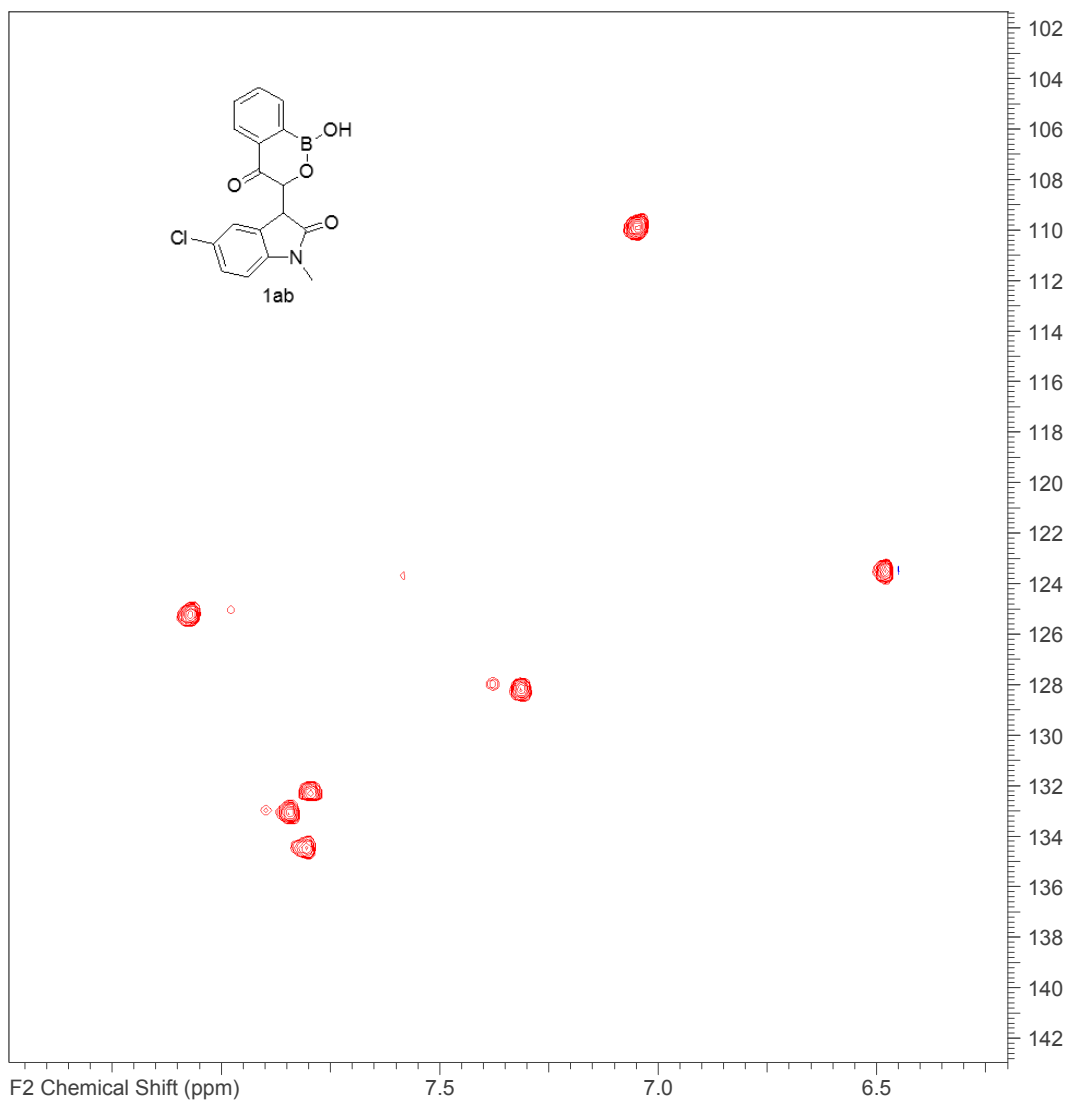

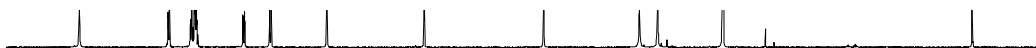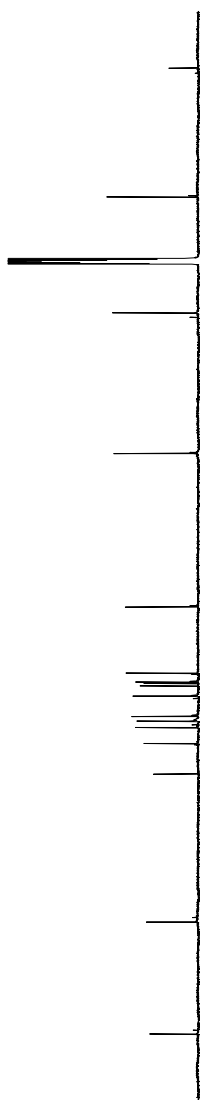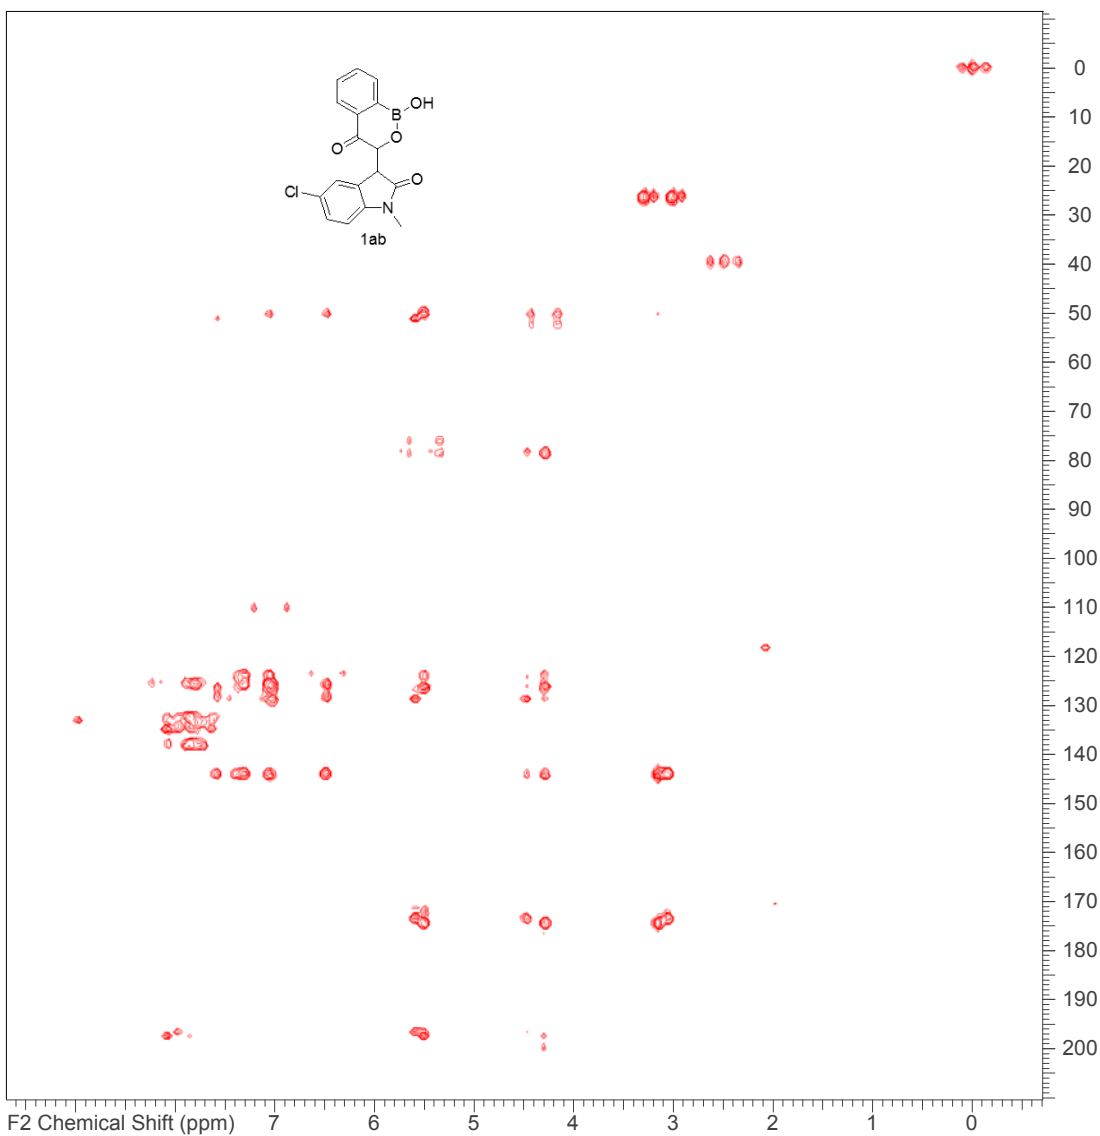

# MKA-NCH3-ISA-M

11-01-2015 12:57:16

|                        |                                                                               |                        |                                                                      |                      |           |
|------------------------|-------------------------------------------------------------------------------|------------------------|----------------------------------------------------------------------|----------------------|-----------|
| Acquisition Time (sec) | 3.1719                                                                        | Comment                | MKA-NCH3-ISA-01-24h/DMSO PROTON DMSO (F:\ecm\DATA\2014-04) bionmr 24 |                      |           |
| Date                   | 12 May 2014 00:32:08                                                          | Date Stamp             | 12 May 2014 00:32:08                                                 |                      |           |
| File Name              | D:\New folder\Pandrive 1\Transcend\ECM final\MKA-NCH3-ISA-01-24h\2\PDATA\1\1r |                        |                                                                      | Frequency (MHz)      | 500.13    |
| Nucleus                | 1H                                                                            | Number of Transients   | 16                                                                   | Origin               | spect     |
| Owner                  | administrator                                                                 | Points Count           | 32768                                                                | Pulse Sequence       | zq30      |
| SW(cyclical) (Hz)      | 10330.58                                                                      | Solvent                | DMSO-d6                                                              | Spectrum Offset (Hz) | 3091.6387 |
| Sweep Width (Hz)       | 10330.26                                                                      | Temperature (degree C) | 25.000                                                               | Spectrum Type        | STANDARD  |

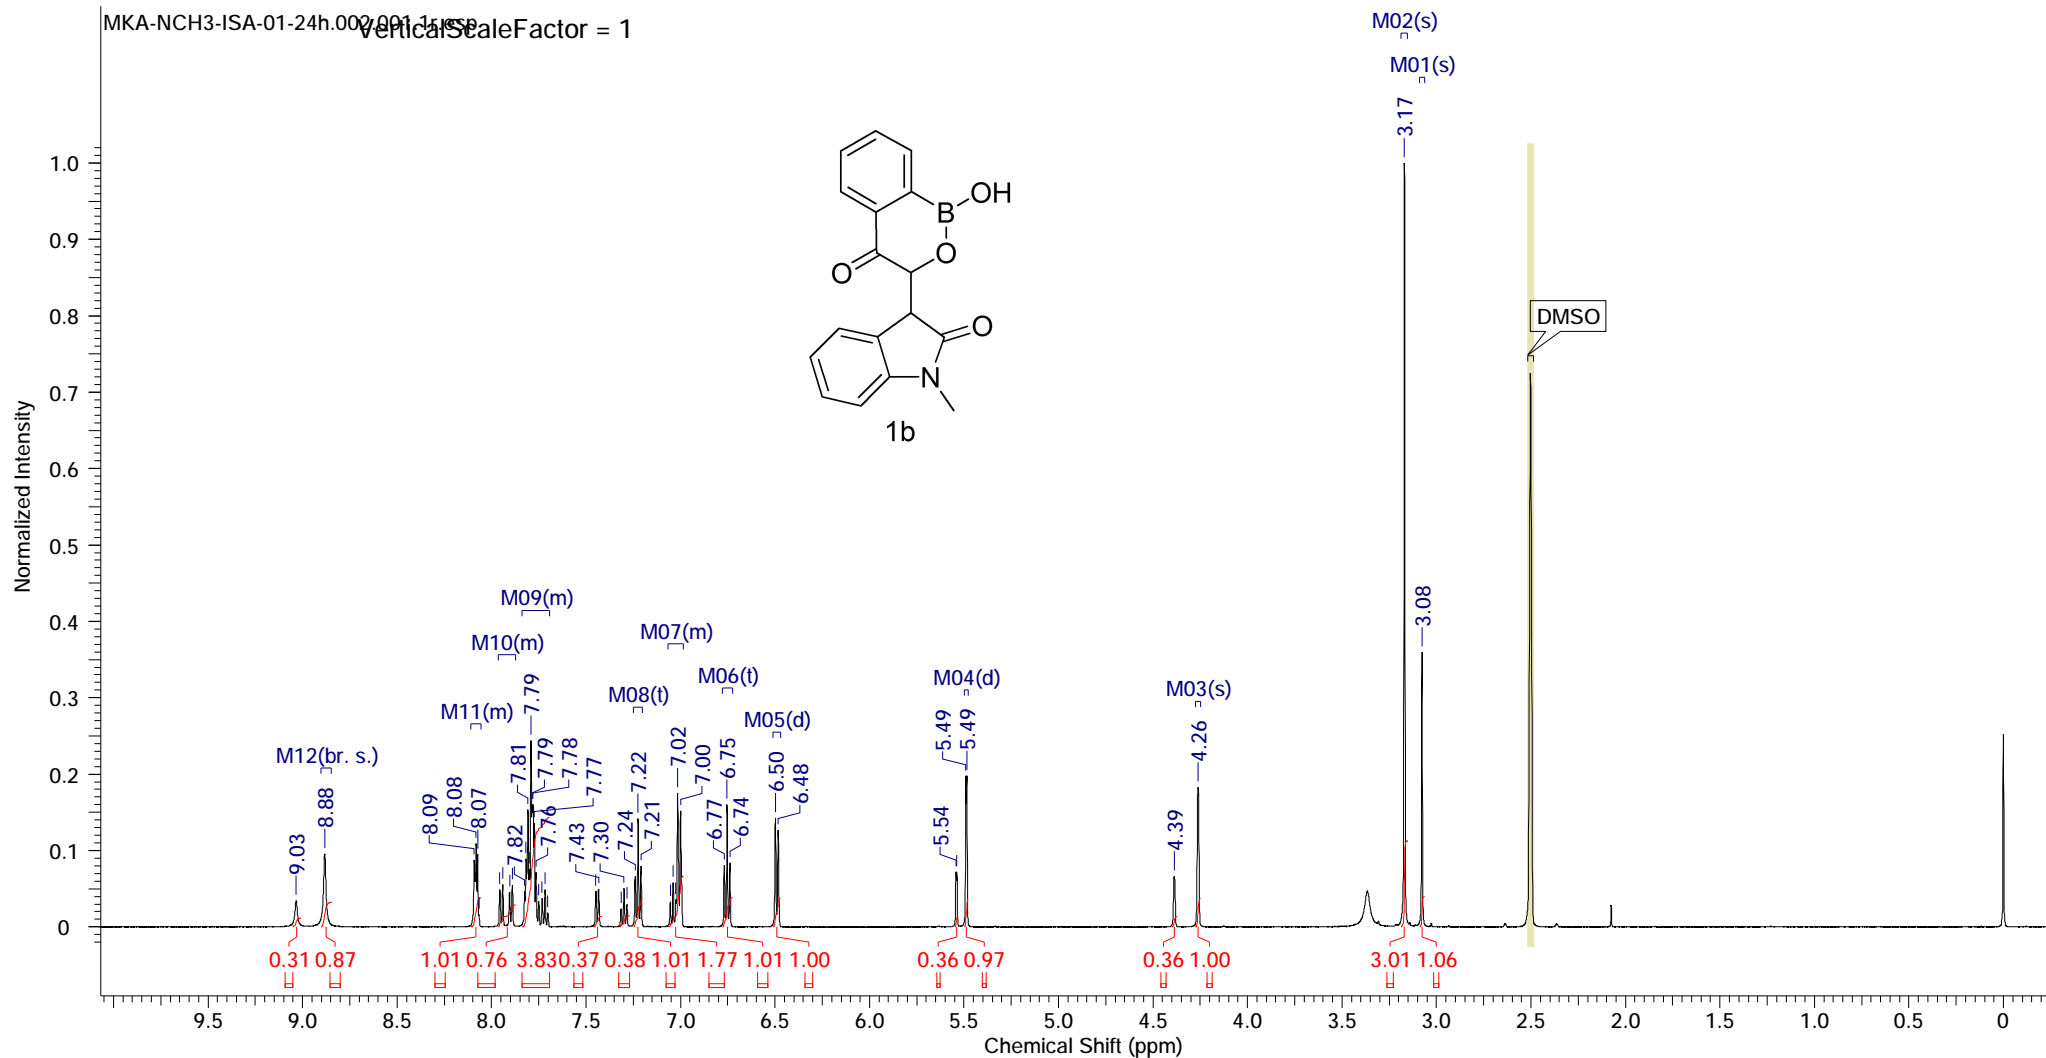

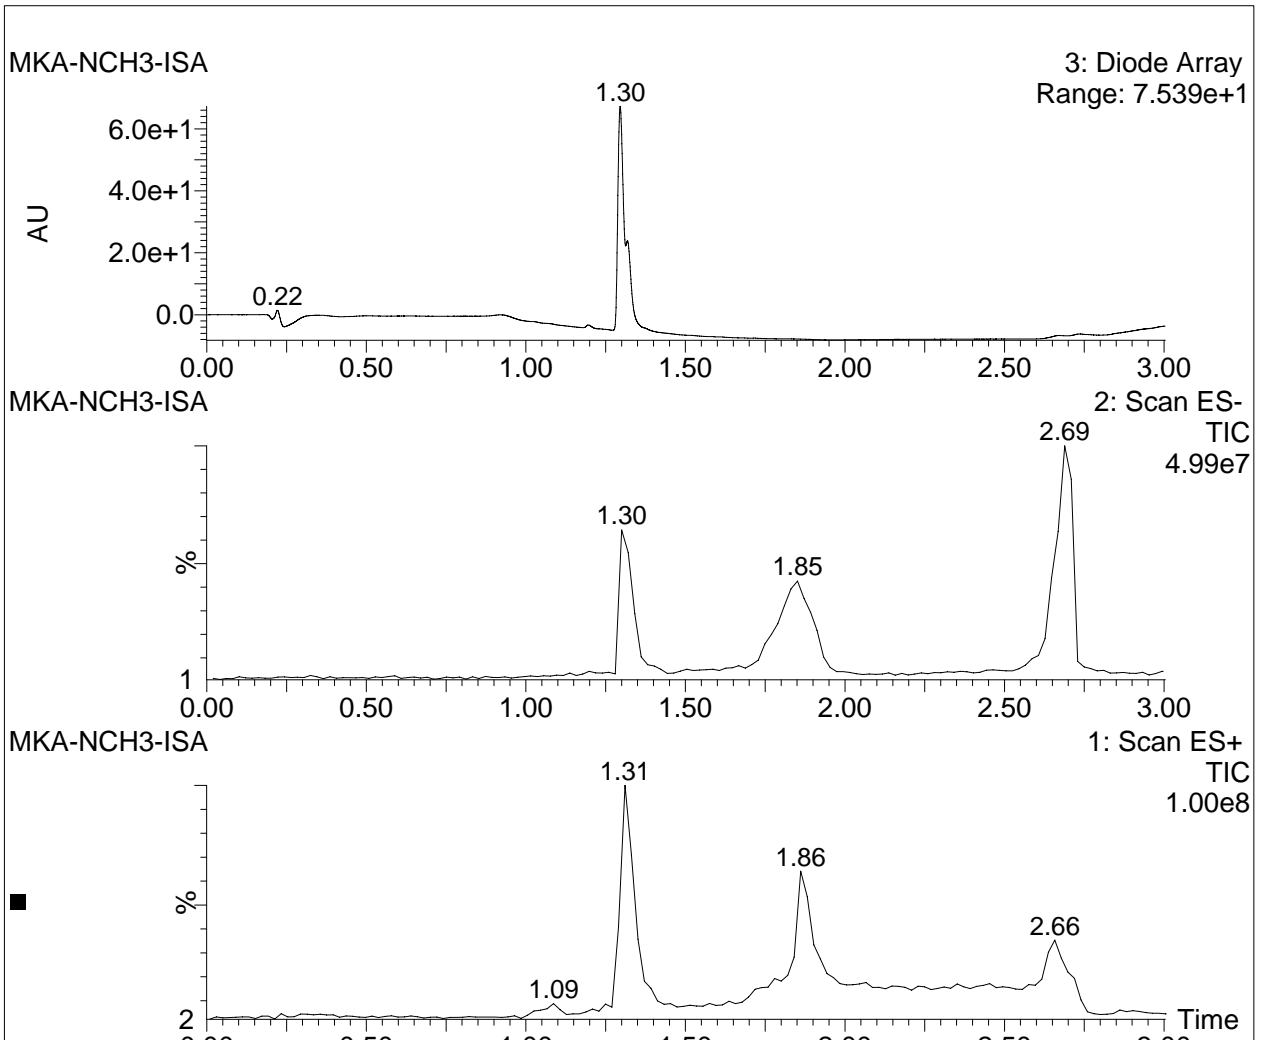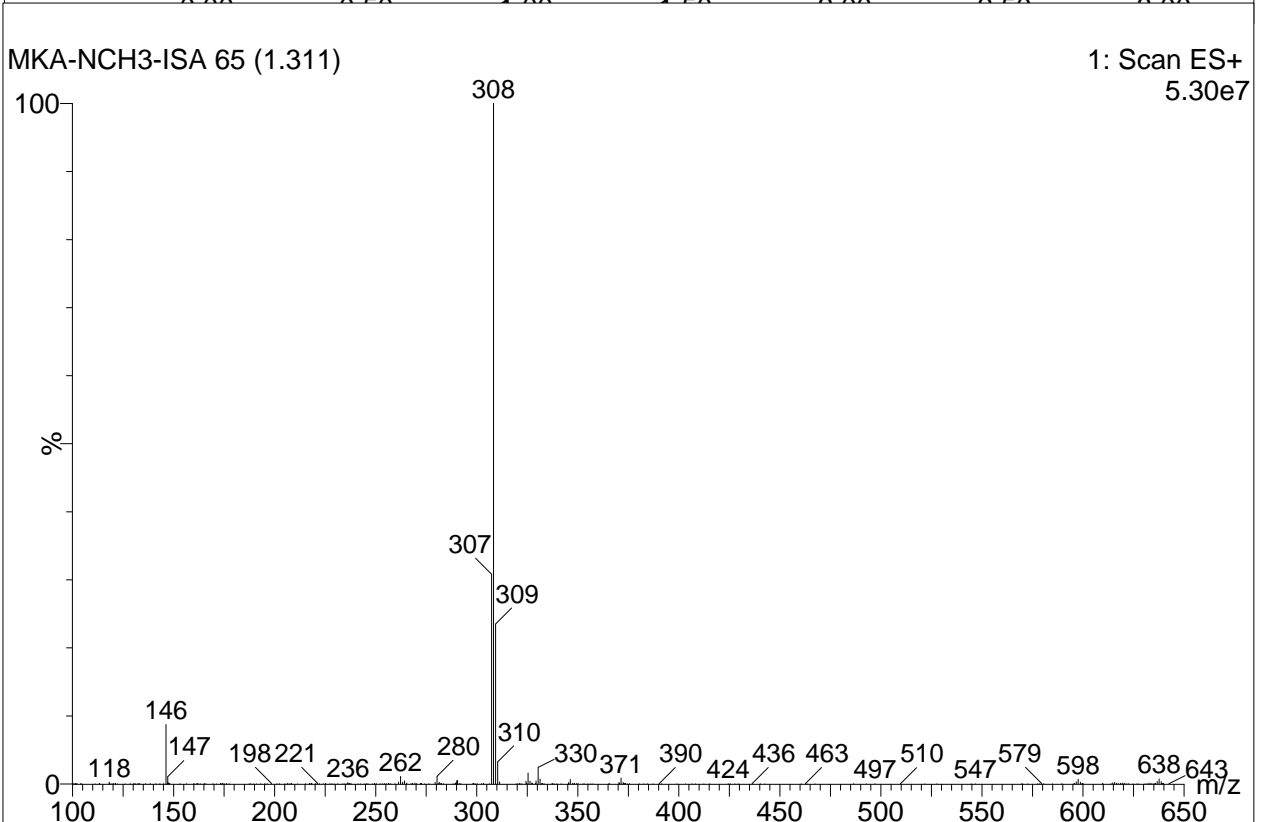

# MKA-CI-ISA-P1

16/05/2014 11:08:55

|                                    |                                                         |                                 |                                                                  |                              |          |
|------------------------------------|---------------------------------------------------------|---------------------------------|------------------------------------------------------------------|------------------------------|----------|
| <b>OriginalDateForRelativeTime</b> | 2014-05-09T15:04:40                                     | <b>Multiplets Integrals Sum</b> | 14.04                                                            | <b>Number of Nuclei</b>      | 14 H's   |
| <b>Acquisition Time (sec)</b>      | 3.1719                                                  | <b>Comment</b>                  | MKA-NCH3-ISA-01/DMSO PROTON DMSO {F:\ecm\DATA\2014-04} bionmr 24 |                              |          |
| <b>Date</b>                        | 09 May 2014 15:04:40                                    | <b>Date Stamp</b>               | 09 May 2014 15:04:40                                             |                              |          |
| <b>File Name</b>                   | \\inbgrdsfp01\lndata\MKA\MKA-NCH3-ISA-01\1\1\PDATA\1\1r | <b>Frequency (MHz)</b>          | 500.13                                                           | <b>Nucleus</b>               | 1H       |
| <b>Number of Transients</b>        | 16                                                      | <b>Origin</b>                   | spect                                                            | <b>Original Points Count</b> | 32768    |
| <b>Points Count</b>                | 32768                                                   | <b>Pulse Sequence</b>           | zg30                                                             | <b>Receiver Gain</b>         | 4.00     |
| <b>Solvent</b>                     | DMSO-d6                                                 | <b>Spectrum Offset (Hz)</b>     | 3090.5376                                                        | <b>Spectrum Type</b>         | STANDARD |
| <b>Temperature (degree C)</b>      | 25.000                                                  | <b>Sweep Width (Hz)</b>         | 10330.26                                                         |                              |          |

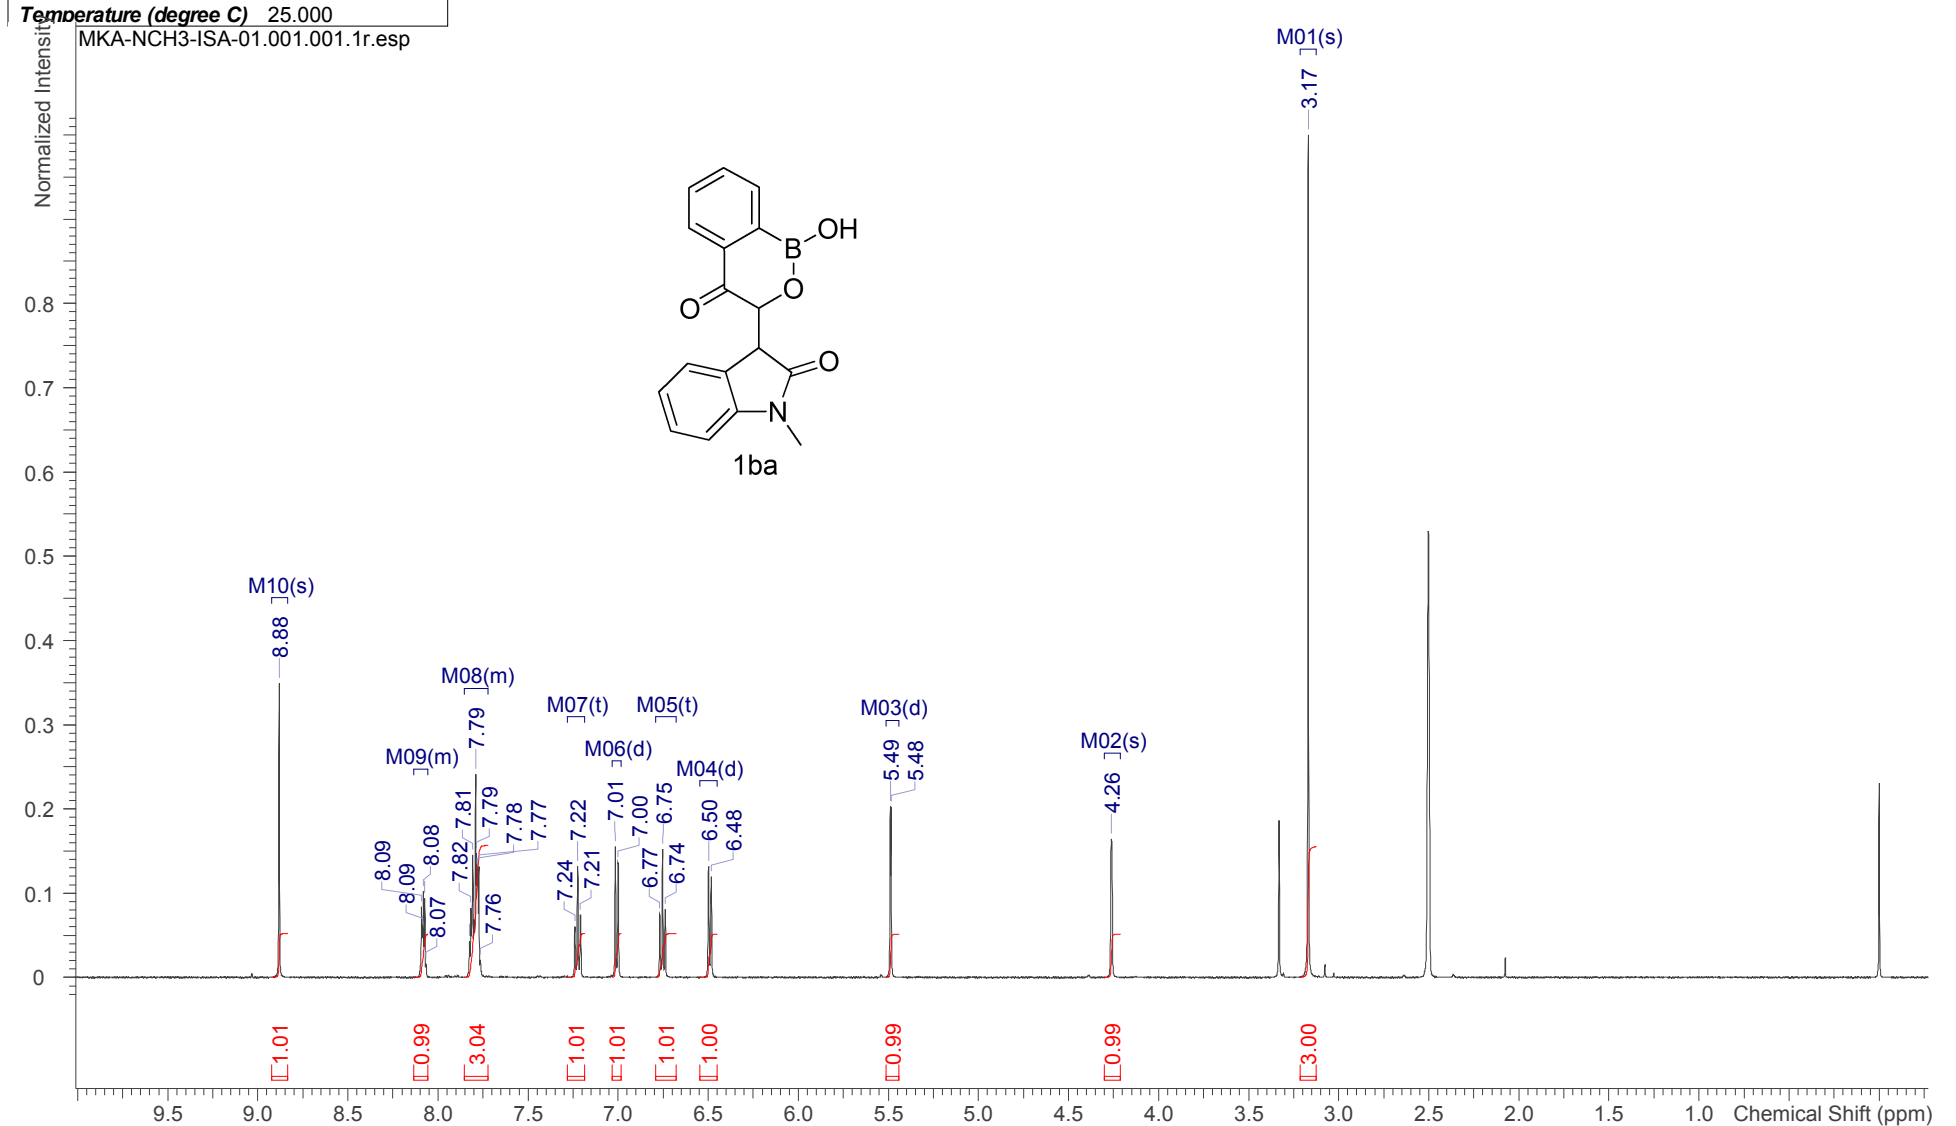

# MKA-NCH3-ISA-P1

16/05/2014 13:31:49

|                             |                                                       |                          |                                                                  |                       |          |
|-----------------------------|-------------------------------------------------------|--------------------------|------------------------------------------------------------------|-----------------------|----------|
| OriginalDateForRelativeTime | 2014-05-09T20:20:24                                   | Multiplets Integrals Sum | 0.00                                                             | Number of Nuclei      | 0 C's    |
| Acquisition Time (sec)      | 1.0912                                                | Comment                  | MKA-NCH3-ISA-01/DMSO C13CPD DMSO {F:\ecm\DATA\2014-04} bionmr 24 |                       |          |
| Date                        | 09 May 2014 20:20:24                                  | Date Stamp               | 09 May 2014 20:20:24                                             |                       |          |
| File Name                   | \\inbgrdsfp01\elndata\MKAMKA-NCH3-ISA-01\2\PDATA\1\1r | Frequency (MHz)          | 125.77                                                           | Nucleus               | 13C      |
| Number of Transients        | 6000                                                  | Origin                   | spect                                                            | Original Points Count | 32768    |
| Points Count                | 32768                                                 | Pulse Sequence           | zpgg30                                                           | Receiver Gain         | 32768.00 |
| Solvent                     | DMSO-d6                                               | Spectrum Offset (Hz)     | 12504.4170                                                       | SW(cyclical) (Hz)     | 30030.03 |
| Temperature (degree C)      | 25.000                                                | Spectrum Type            | STANDARD                                                         | Sweep Width (Hz)      | 30029.11 |

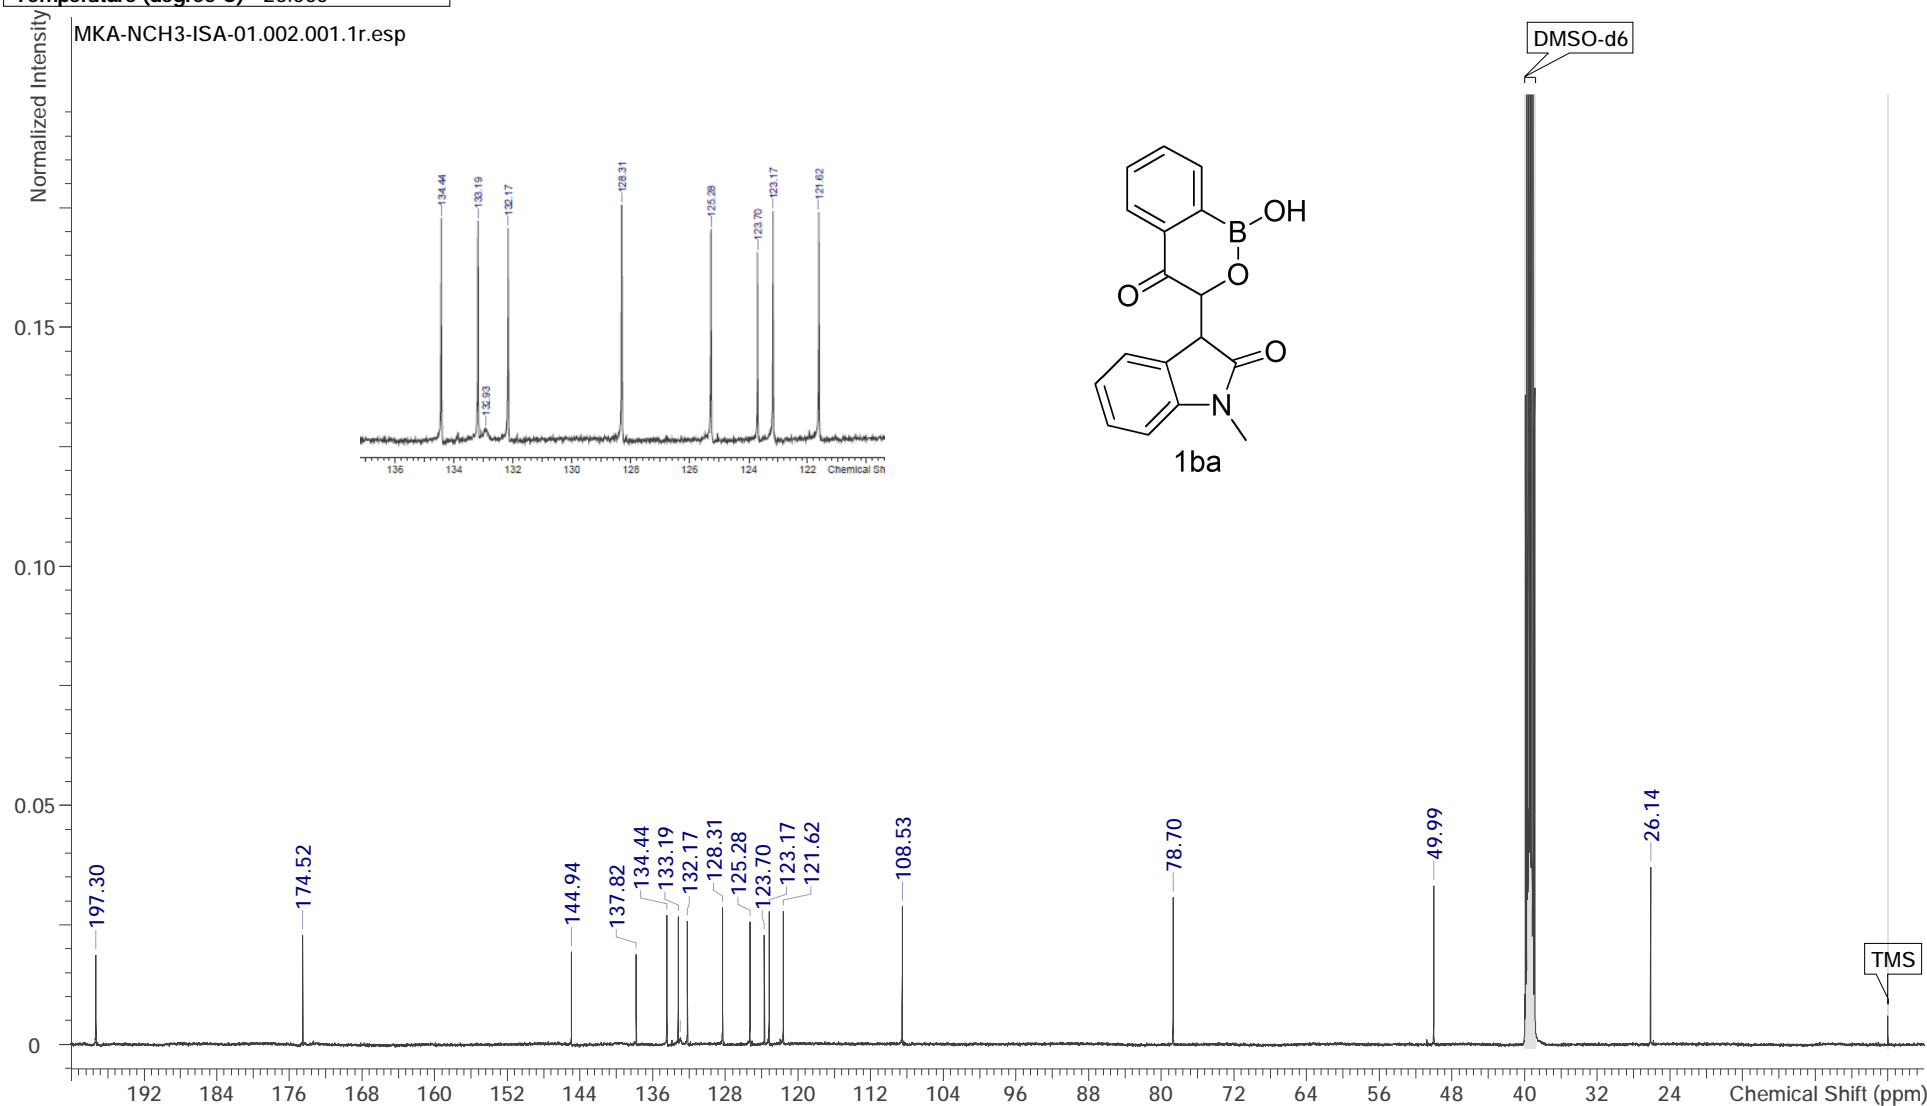

# MKA-NH-ISA-M

16/05/2014 14:18:28

|                                                        |                                                                           |                                       |                                       |                                  |  |
|--------------------------------------------------------|---------------------------------------------------------------------------|---------------------------------------|---------------------------------------|----------------------------------|--|
| <b>OriginalDateForRelativeTime</b> 2014-04-11T20:16:08 |                                                                           | <b>Multiplets Integrals Sum</b> 19.93 |                                       | <b>Number of Nuclei</b> 23 H's   |  |
| <b>Acquisition Time (sec)</b> 5.3084                   | <b>Comment</b> MKA-NH-ISA/DMSO                                            |                                       |                                       | <b>Date</b> 11 Apr 2014 20:16:08 |  |
| <b>Date Stamp</b> 11 Apr 2014 20:16:08                 | <b>File Name</b> C:\Users\kkth216\Desktop\NMR-300\MKA-NH-ISA\1\PDATA\1\1r |                                       |                                       |                                  |  |
| <b>Frequency (MHz)</b> 300.13                          | <b>Nucleus</b> 1H                                                         | <b>Number of Transients</b> 126       | <b>Origin</b> av300                   |                                  |  |
| <b>Original Points Count</b> 32768                     | <b>Owner</b> administrator                                                | <b>Points Count</b> 32768             | <b>Pulse Sequence</b> zg30            |                                  |  |
| <b>Receiver Gain</b> 1625.50                           | <b>SW(cyclical) (Hz)</b> 6172.84                                          | <b>Solvent</b> DMSO-d6                | <b>Spectrum Offset (Hz)</b> 1853.4569 |                                  |  |
| <b>Spectrum Type</b> STANDARD                          | <b>Sweep Width (Hz)</b> 6172.65                                           | <b>Temperature (degree C)</b> 25.000  |                                       |                                  |  |

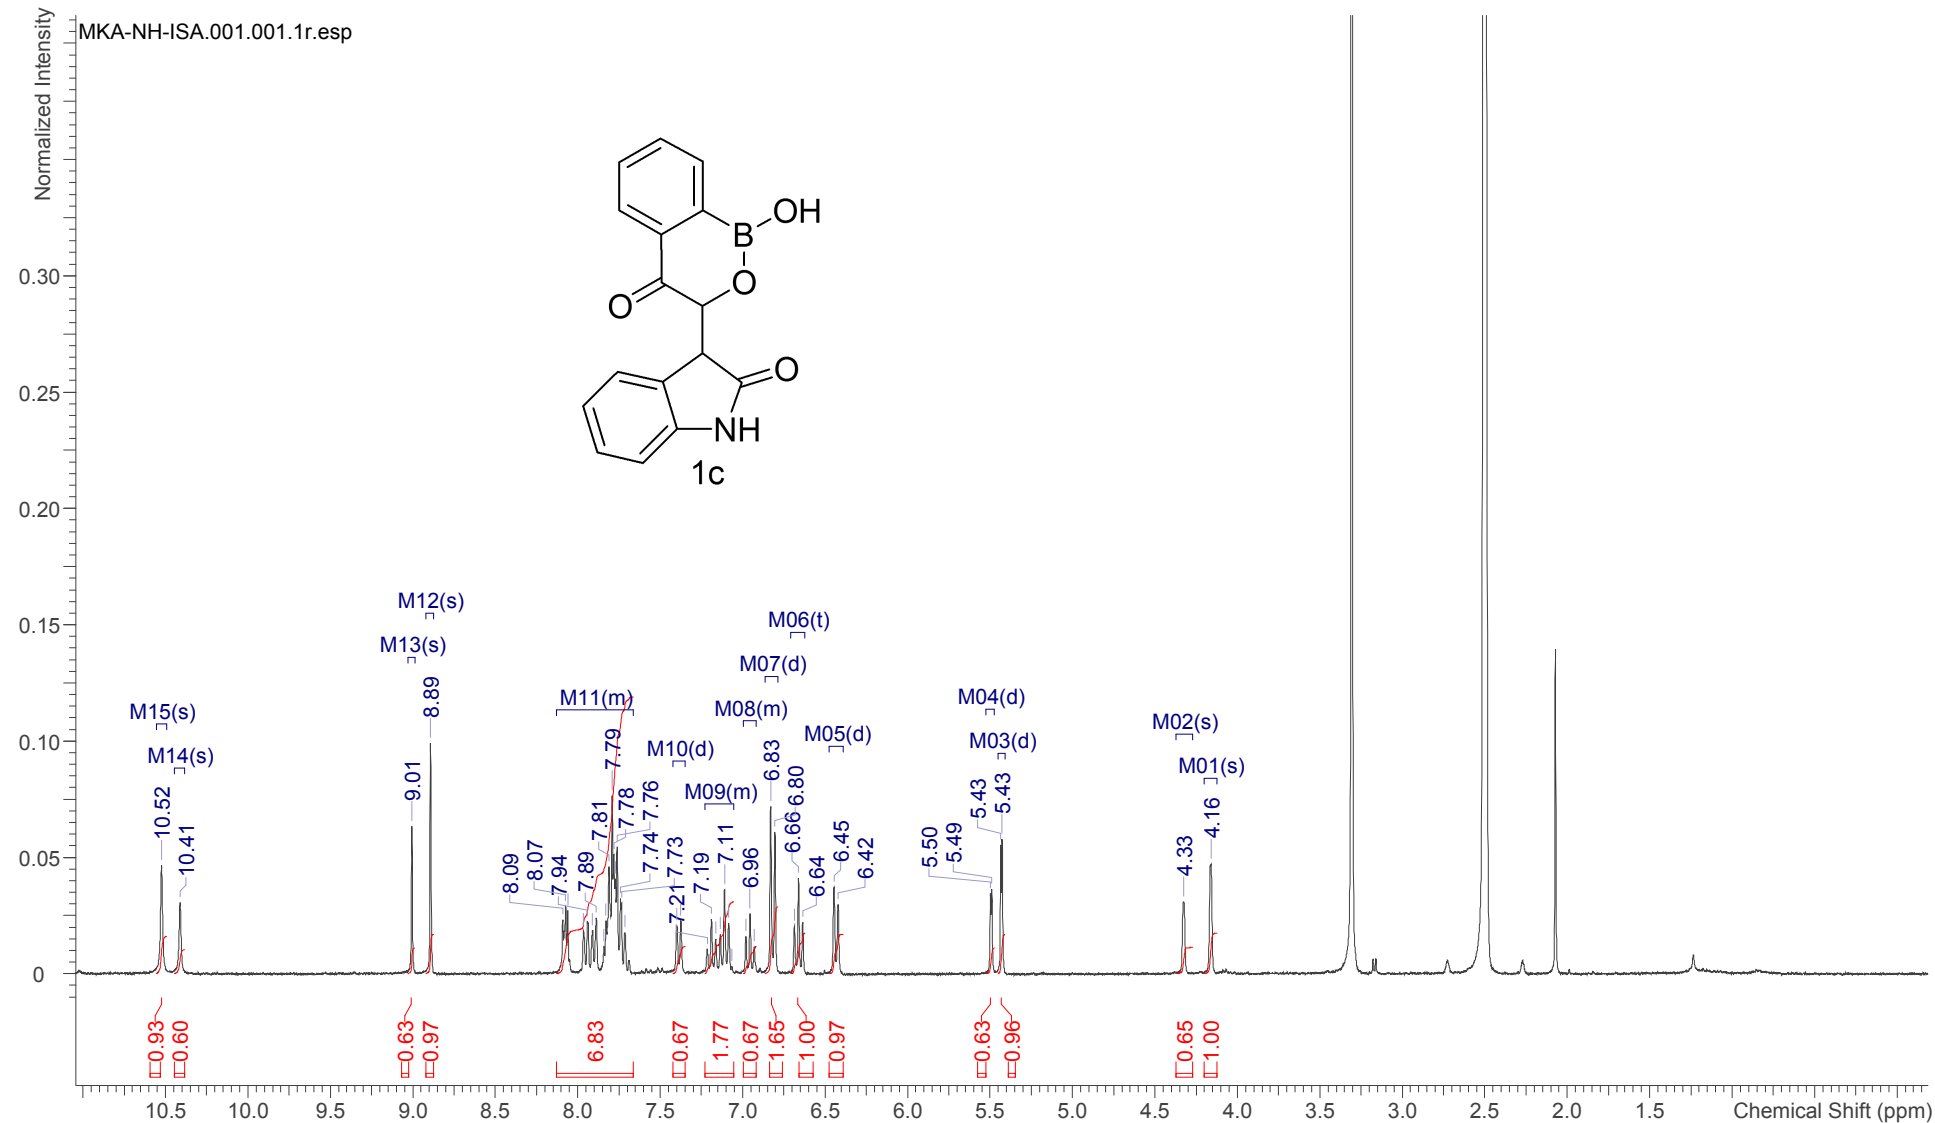

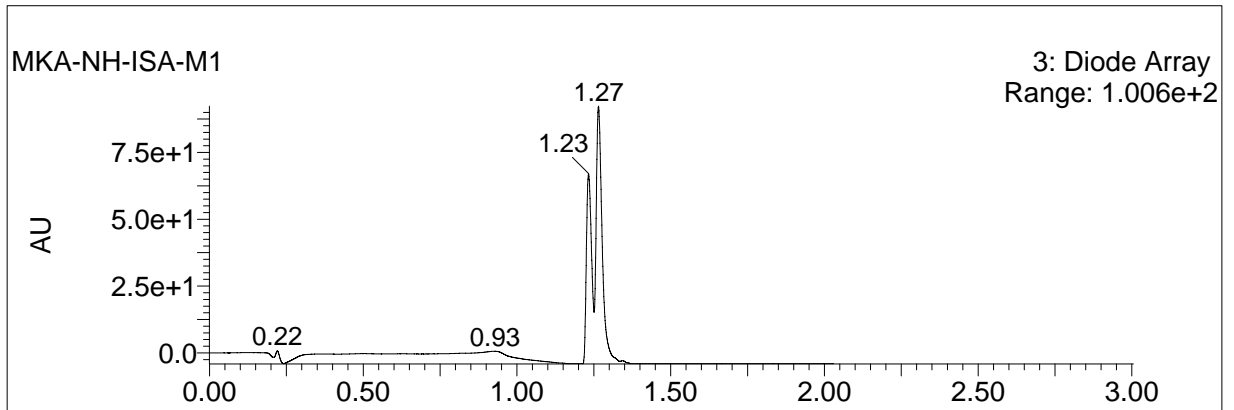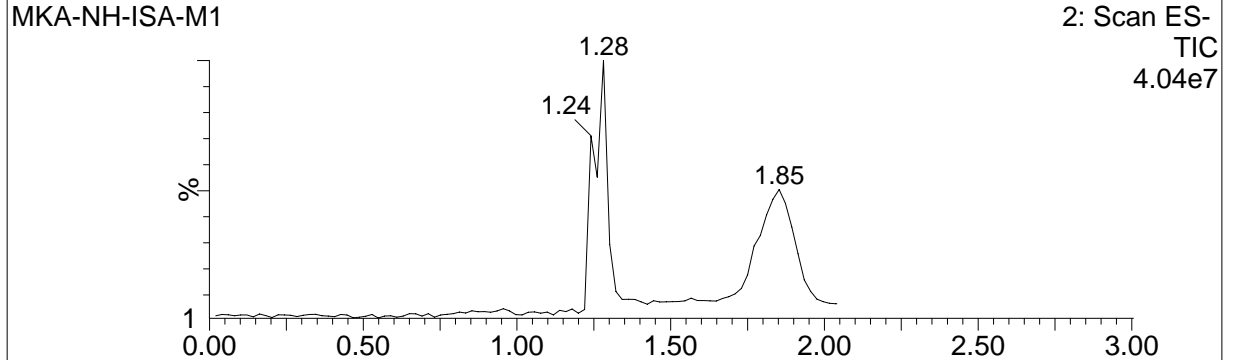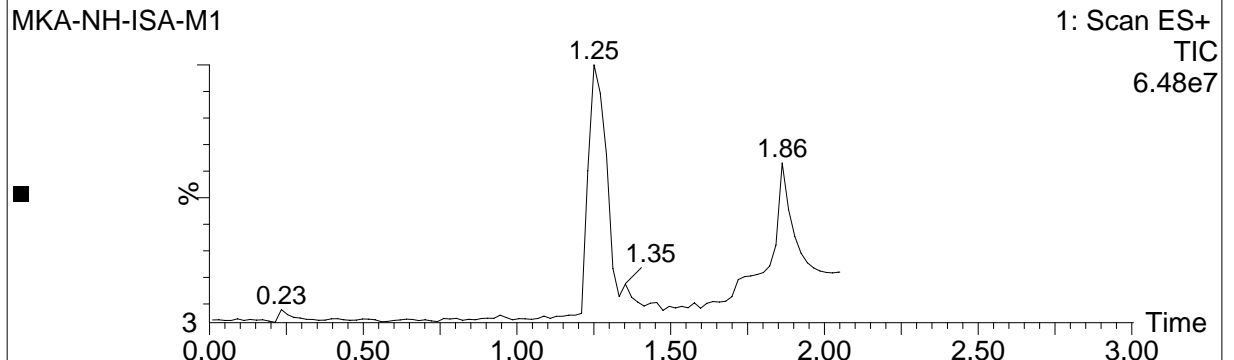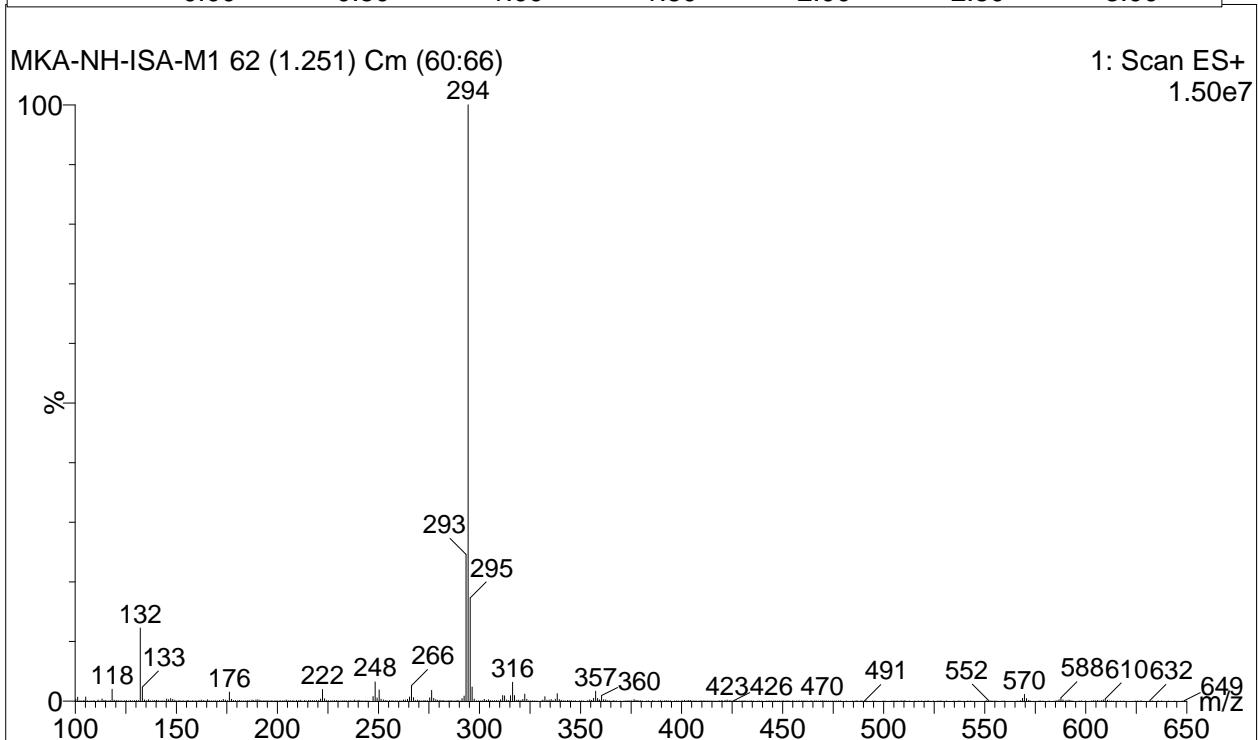



# MKA-NH-ISA-P1

16/05/2014 13:34:23

|                                    |                                                      |                                 |                                                                |                              |          |
|------------------------------------|------------------------------------------------------|---------------------------------|----------------------------------------------------------------|------------------------------|----------|
| <b>OriginalDateForRelativeTime</b> | 2014-05-09T09:36:08                                  | <b>Multiplets Integrals Sum</b> | 12.22                                                          | <b>Number of Nuclei</b>      | 12 H's   |
| <b>Acquisition Time (sec)</b>      | 3.1719                                               | <b>Comment</b>                  | MKA-NH-ISA-01/DMSO PROTON DMSO {F:\ecm\DATA\2014-04} bionmr 23 |                              |          |
| <b>Date</b>                        | 09 May 2014 09:36:08                                 | <b>Date Stamp</b>               | 09 May 2014 09:36:08                                           |                              |          |
| <b>File Name</b>                   | \\inbgrdsfp01\elndata\MKA\MKA-NH-ISA-01\1\PDATA\1\1r | <b>Frequency (MHz)</b>          | 500.13                                                         | <b>Nucleus</b>               | 1H       |
| <b>Number of Transients</b>        | 16                                                   | <b>Origin</b>                   | spect                                                          | <b>Original Points Count</b> | 32768    |
| <b>Points Count</b>                | 32768                                                | <b>Pulse Sequence</b>           | zg30                                                           | <b>Receiver Gain</b>         | 4.00     |
| <b>Solvent</b>                     | DMSO-d6                                              | <b>Spectrum Offset (Hz)</b>     | 3094.0537                                                      | <b>Spectrum Type</b>         | STANDARD |
| <b>Temperature (degree C)</b>      | 25.000                                               |                                 |                                                                | <b>Sweep Width (Hz)</b>      | 10330.26 |

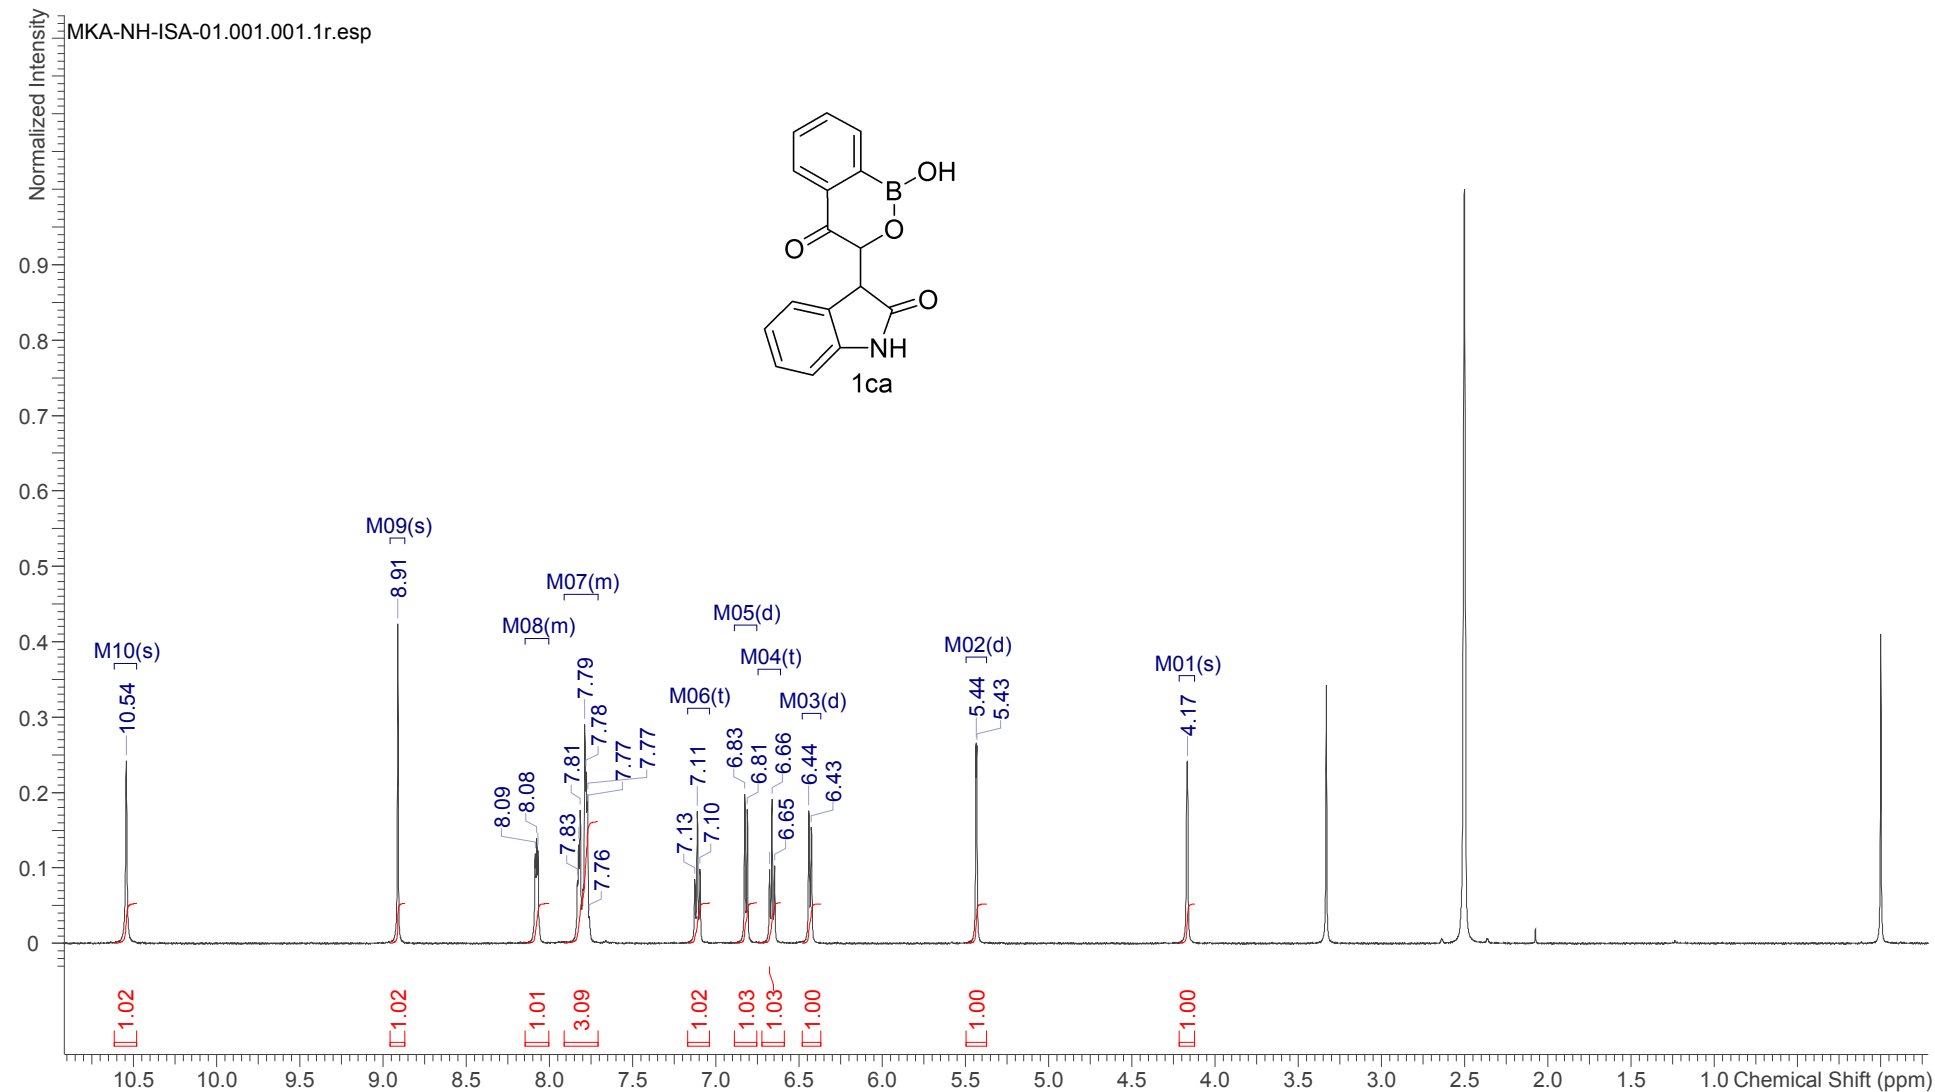

|                                                 |                                                             |                                                                         |         |                        |            |
|-------------------------------------------------|-------------------------------------------------------------|-------------------------------------------------------------------------|---------|------------------------|------------|
| OriginalDateForRelativeTime 2014-05-09T14:51:52 |                                                             | Multiplets Integrals Sum 0.00                                           |         | Number of Nuclei 0 C's |            |
| Acquisition Time (sec)                          | 1.0912                                                      | Comment MKA-NH-ISA-01/DMSO C13CPD DMSO (F:\ecml\DATA\2014-04) bionnr 23 |         |                        |            |
| Date                                            | 09 May 2014 14:51:52                                        | Date Stamp                                                              |         | 09 May 2014 14:51:52   |            |
| File Name                                       | \in\bqrdsp01\ehdata\MKA\07052014\MKA-NH-ISA-01\2\PDATA\1\1r |                                                                         |         | Frequency (MHz)        | 125.77     |
| Nucleus                                         | <sup>13</sup> C                                             | Number of Transients                                                    | 6000    | Original Points Count  | 32768      |
| Owner                                           | administrator                                               | Points Count                                                            | 32768   | Pulse Sequence         | zgpg30     |
| SW(cyclical) (Hz)                               | 30030.03                                                    | Solvent                                                                 | DMSO-d6 | Receiver Gain          | 32768.00   |
| Sweep Width (Hz)                                | 30029.11                                                    | Temperature (degree C)                                                  | 25.000  | Spectrum Offset (Hz)   | 12519.3086 |
|                                                 |                                                             |                                                                         |         | Spectrum Type          | STANDARD   |

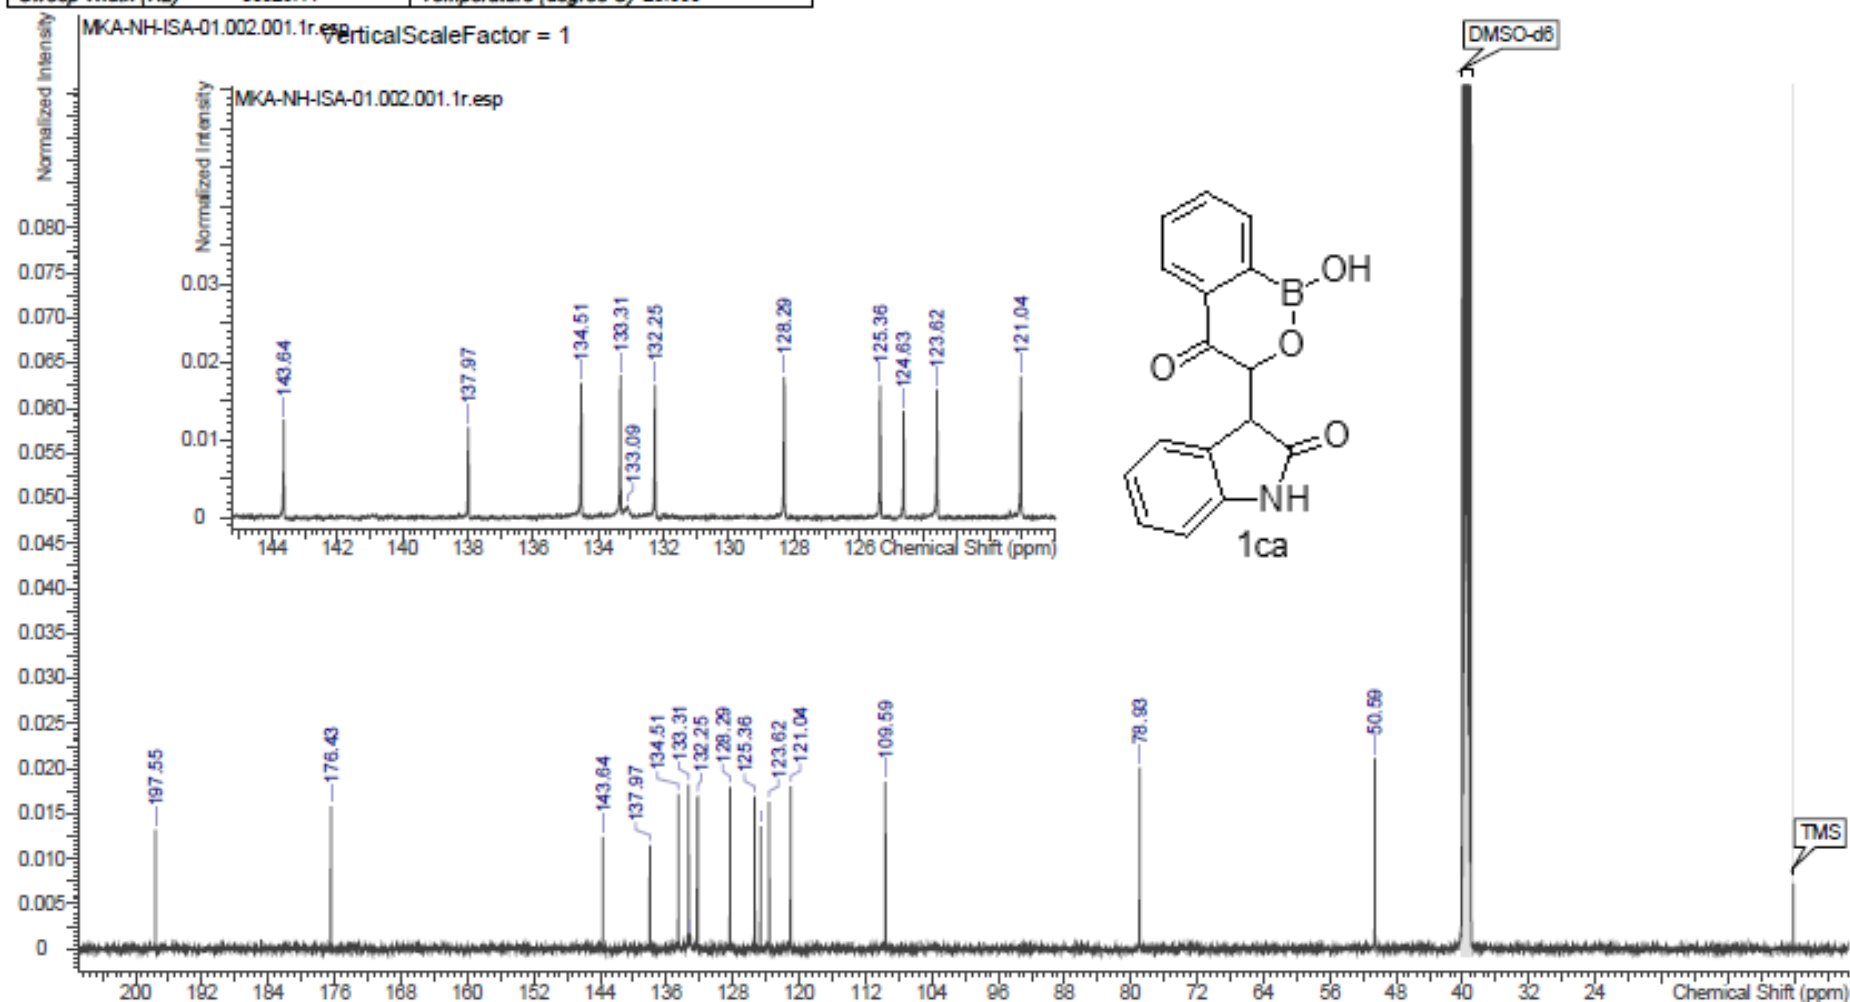

# MKA-F-ISA-M

16/05/2014 14:21:59

|                                    |                      |                                 |                                                            |                               |                      |
|------------------------------------|----------------------|---------------------------------|------------------------------------------------------------|-------------------------------|----------------------|
| <b>OriginalDateForRelativeTime</b> | 2014-04-12T11:27:04  | <b>Multiplets Integrals Sum</b> | 24.92                                                      | <b>Number of Nuclei</b>       | 26 H's               |
| <b>Acquisition Time (sec)</b>      | 5.3084               | <b>Comment</b>                  | MKA-F-ISA-M/DMSO                                           | <b>Date</b>                   | 12 Apr 2014 11:27:04 |
| <b>Date Stamp</b>                  | 12 Apr 2014 11:27:04 | <b>File Name</b>                | C:\Users\skkth216\Desktop\NMR-300\MKA-F-ISA-M\1\PDATA\1\1r |                               |                      |
| <b>Frequency (MHz)</b>             | 300.13               | <b>Nucleus</b>                  | 1H                                                         | <b>Number of Transients</b>   | 126                  |
| <b>Original Points Count</b>       | 32768                | <b>Owner</b>                    | administrator                                              | <b>Points Count</b>           | 32768                |
| <b>Receiver Gain</b>               | 1625.50              | <b>SW(cyclical) (Hz)</b>        | 6172.84                                                    | <b>Solvent</b>                | DMSO-d6              |
| <b>Spectrum Type</b>               | STANDARD             | <b>Sweep Width (Hz)</b>         | 6172.65                                                    | <b>Temperature (degree C)</b> | 24.500               |
|                                    |                      |                                 |                                                            | <b>Spectrum Offset (Hz)</b>   | 1853.4569            |

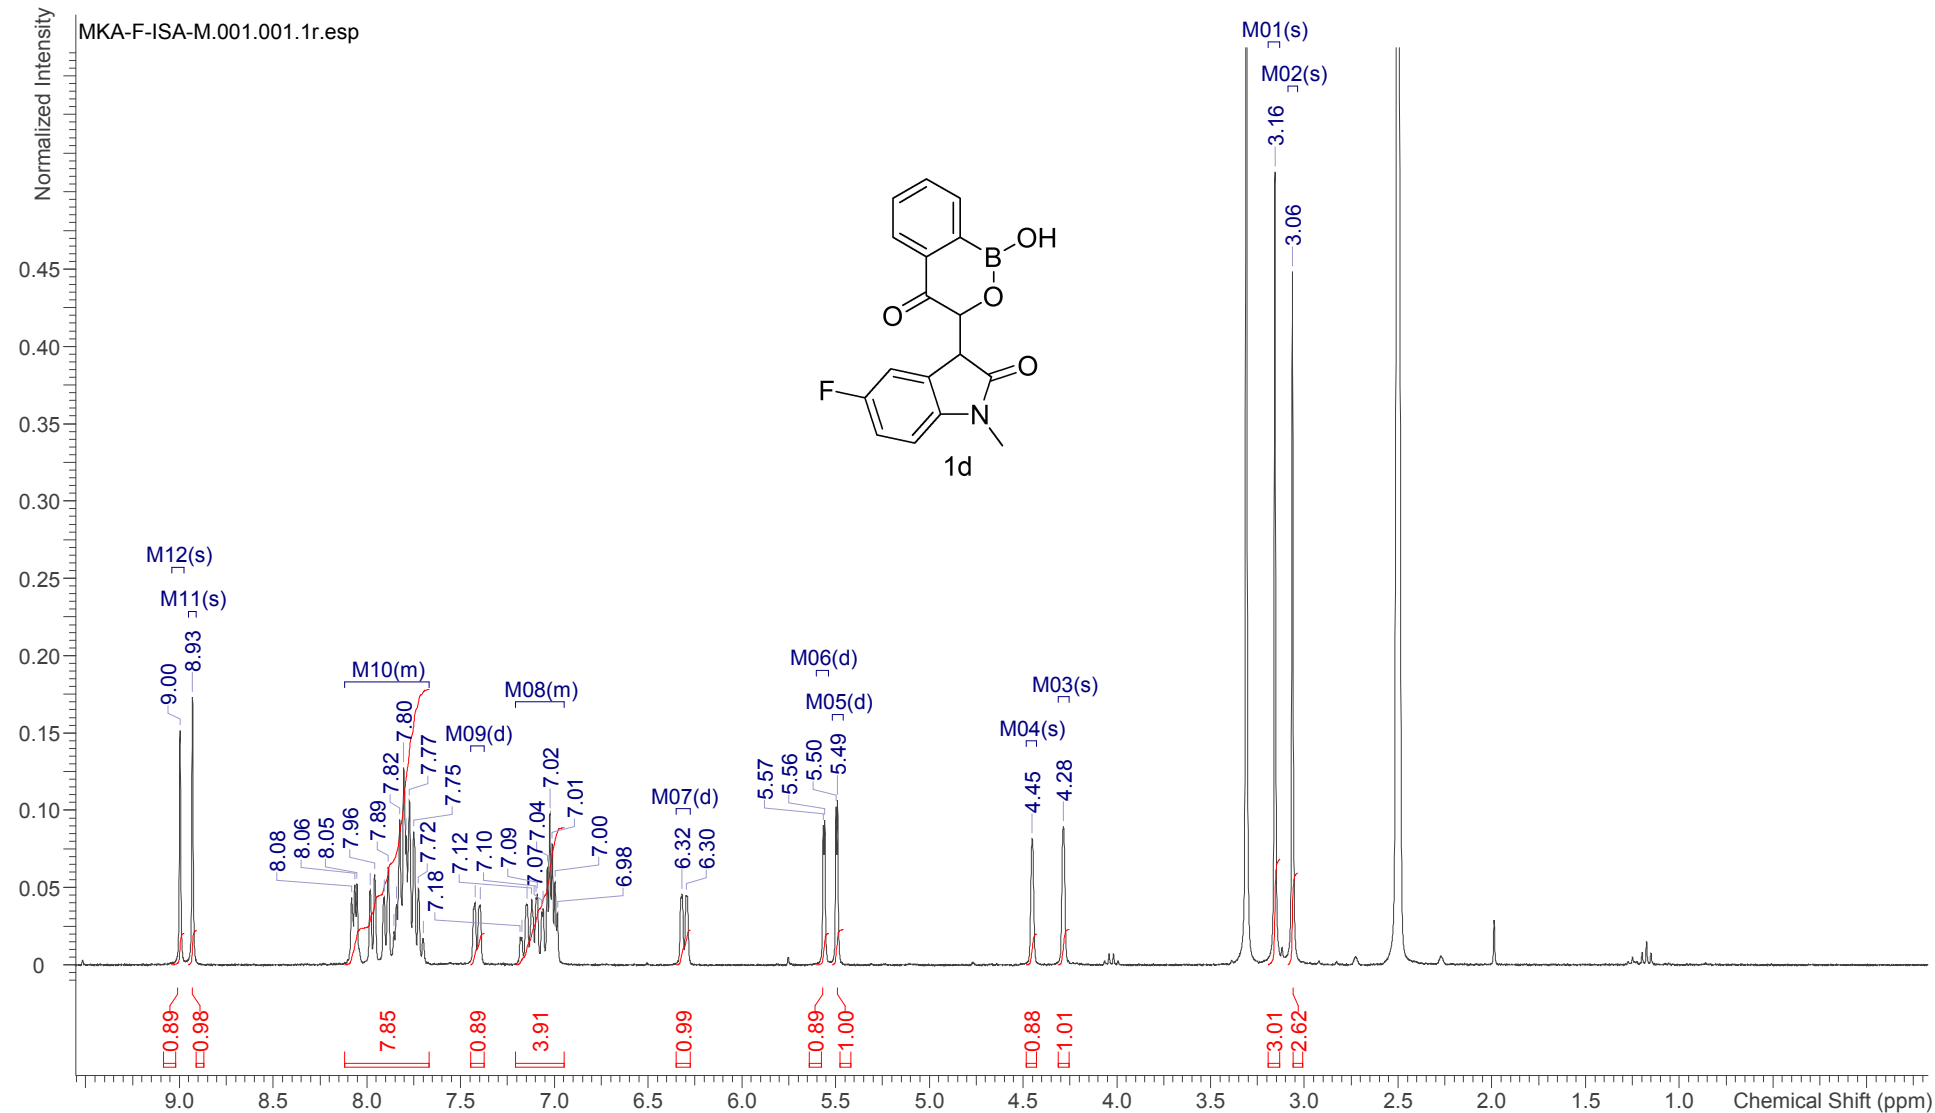

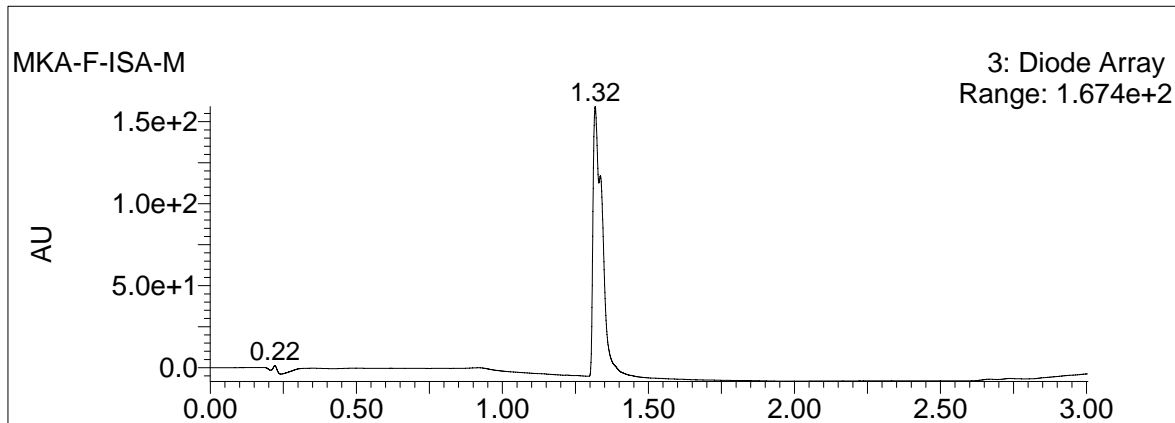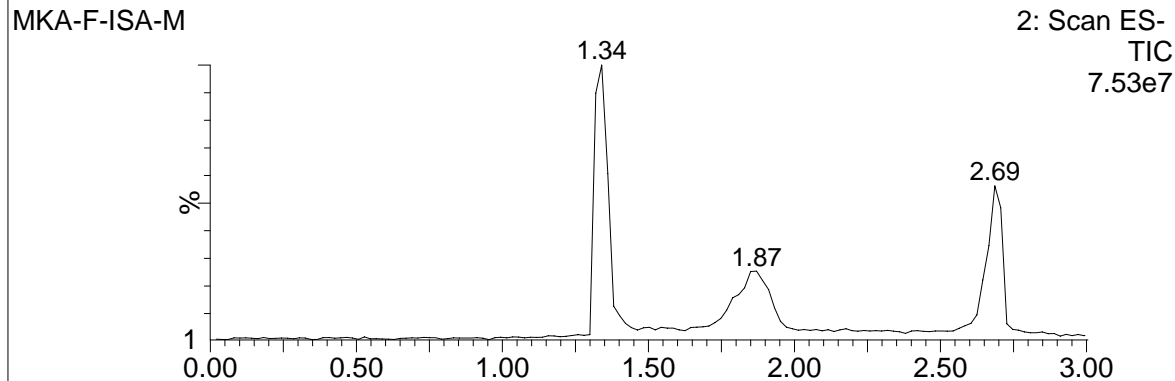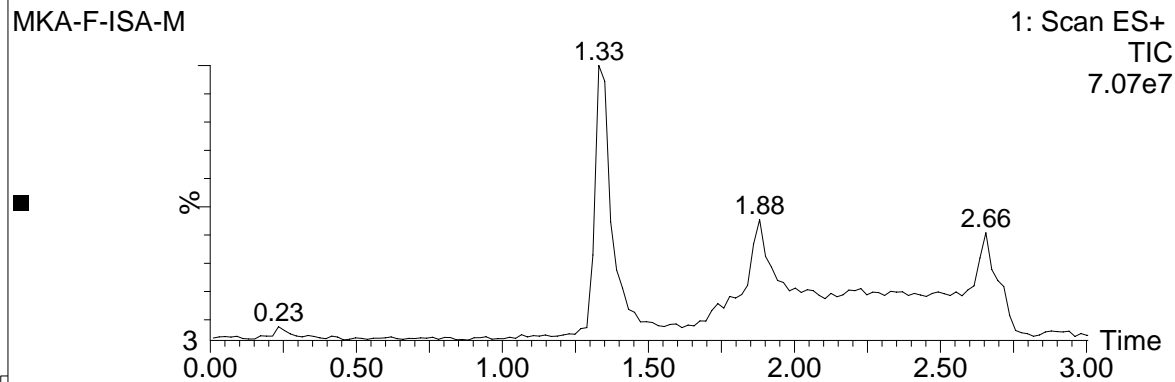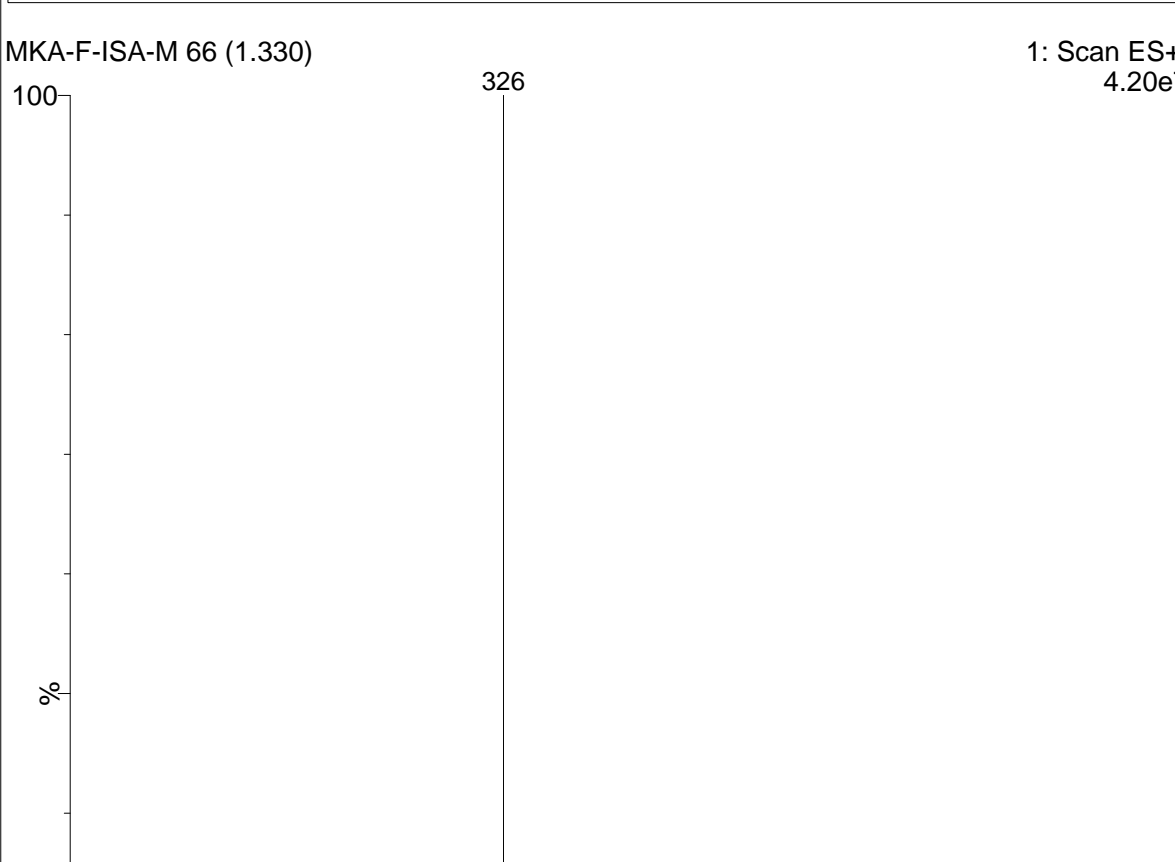

# MKA-F-ISA-P1

15/05/2014 12:17:55

|                                                                                    |                                                                                   |                                       |                                    |                                |  |
|------------------------------------------------------------------------------------|-----------------------------------------------------------------------------------|---------------------------------------|------------------------------------|--------------------------------|--|
| <b>OriginalDateForRelativeTime</b> 2014-05-09T20:26:48                             |                                                                                   | <b>Multiplets Integrals Sum</b> 13.24 |                                    | <b>Number of Nuclei</b> 13 H's |  |
| <b>Acquisition Time (sec)</b> 3.1719                                               | <b>Comment</b> MKA-Fluoro-ISA-01/DMSO PROTON DMSO {F:\ecm\DATA\2014-04} bionmr 25 |                                       |                                    |                                |  |
| <b>Date</b> 09 May 2014 20:26:48                                                   | <b>Date Stamp</b> 09 May 2014 20:26:48                                            |                                       |                                    |                                |  |
| <b>File Name</b> \\inbgrdsfp01\inidata\MKA\07052014\MKA-Fluoro-ISA-01\1\PDATA\1\1r |                                                                                   |                                       | <b>Frequency (MHz)</b> 500.13      |                                |  |
| <b>Nucleus</b> 1H                                                                  | <b>Number of Transients</b> 16                                                    | <b>Origin</b> spect                   | <b>Original Points Count</b> 32768 |                                |  |
| <b>Owner</b> administrator                                                         | <b>Points Count</b> 32768                                                         | <b>Pulse Sequence</b> zg30            | <b>Receiver Gain</b> 4.00          |                                |  |
| <b>SW(cyclical) (Hz)</b> 10330.58                                                  | <b>Solvent</b> DMSO-d6                                                            | <b>Spectrum Offset (Hz)</b> 3091.0784 | <b>Spectrum Type</b> STANDARD      |                                |  |
| <b>Sweep Width (Hz)</b> 10330.26                                                   | <b>Temperature (degree C)</b> 25.000                                              |                                       |                                    |                                |  |

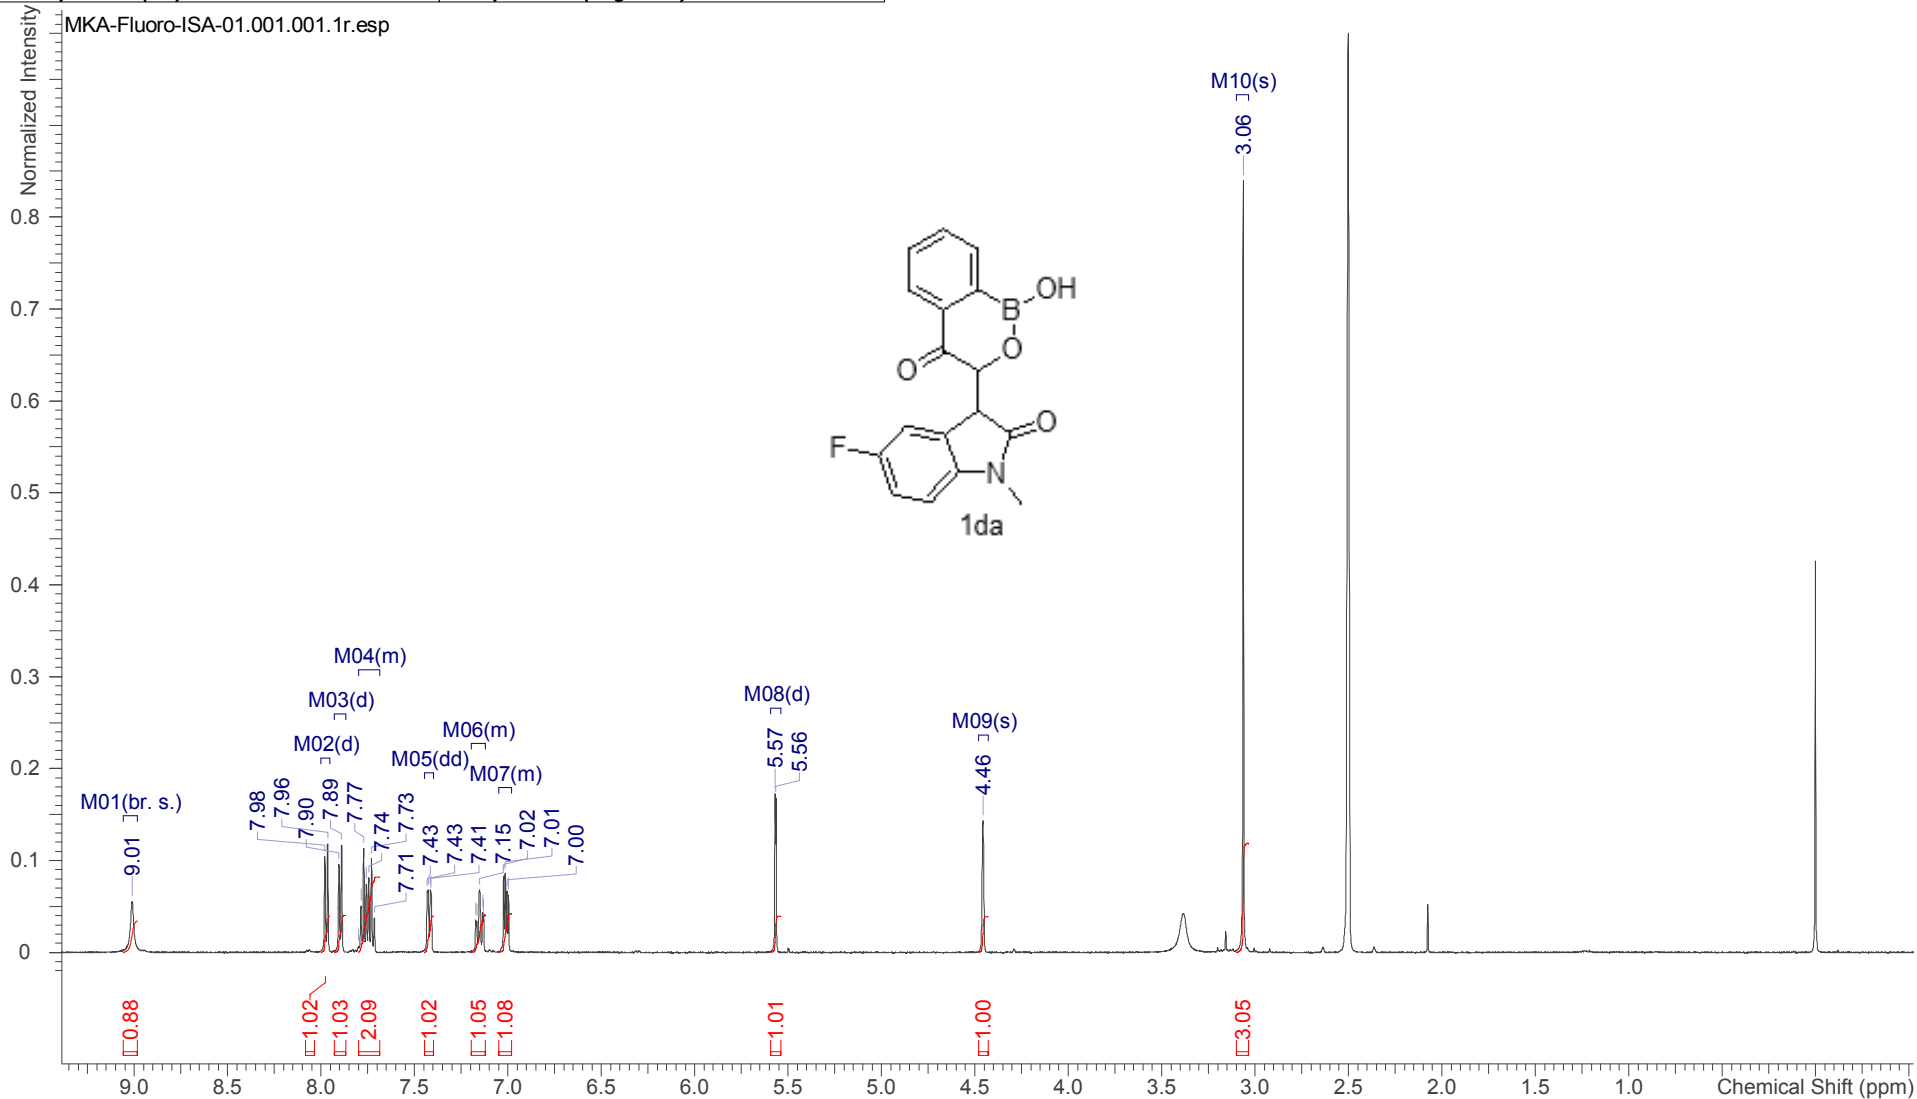

|                             |                                                                |                          |                                                                    |                      |            |
|-----------------------------|----------------------------------------------------------------|--------------------------|--------------------------------------------------------------------|----------------------|------------|
| OriginalDateForRelativeTime | 2014-05-10T01:42:32                                            | Multiplets Integrals Sum | 0.00                                                               | Number of Nuclei     | 0 C's      |
| Acquisition Time (sec)      | 1.0912                                                         | Comment                  | MKA-Fluro-ISA-01/DMSO C13CPD DMSO (F:\ecmi\DATA\2014-04\ bionmr 25 |                      |            |
| Date                        | 10 May 2014 01:42:32                                           | Date Stamp               | 10 May 2014 01:42:32                                               |                      |            |
| File Name                   | \bin\grdsfp01\endata\MKA\07052014\MKA-Fluro-ISA-01\2\PDATA\11r |                          |                                                                    | Frequency (MHz)      | 125.77     |
| Nucleus                     | <sup>13</sup> C                                                | Number of Transients     | 6000                                                               | Origin               | spect      |
| Owner                       | administrator                                                  | Points Count             | 32768                                                              | Pulse Sequence       | zgpg30     |
| SW(cyclical) (Hz)           | 30030.03                                                       | Solvent                  | DMSO-d6                                                            | Spectrum Offset (Hz) | 12518.3926 |
| Sweep Width (Hz)            | 30029.11                                                       | Temperature (degree C)   | 25.000                                                             | Spectrum Type        | STANDARD   |

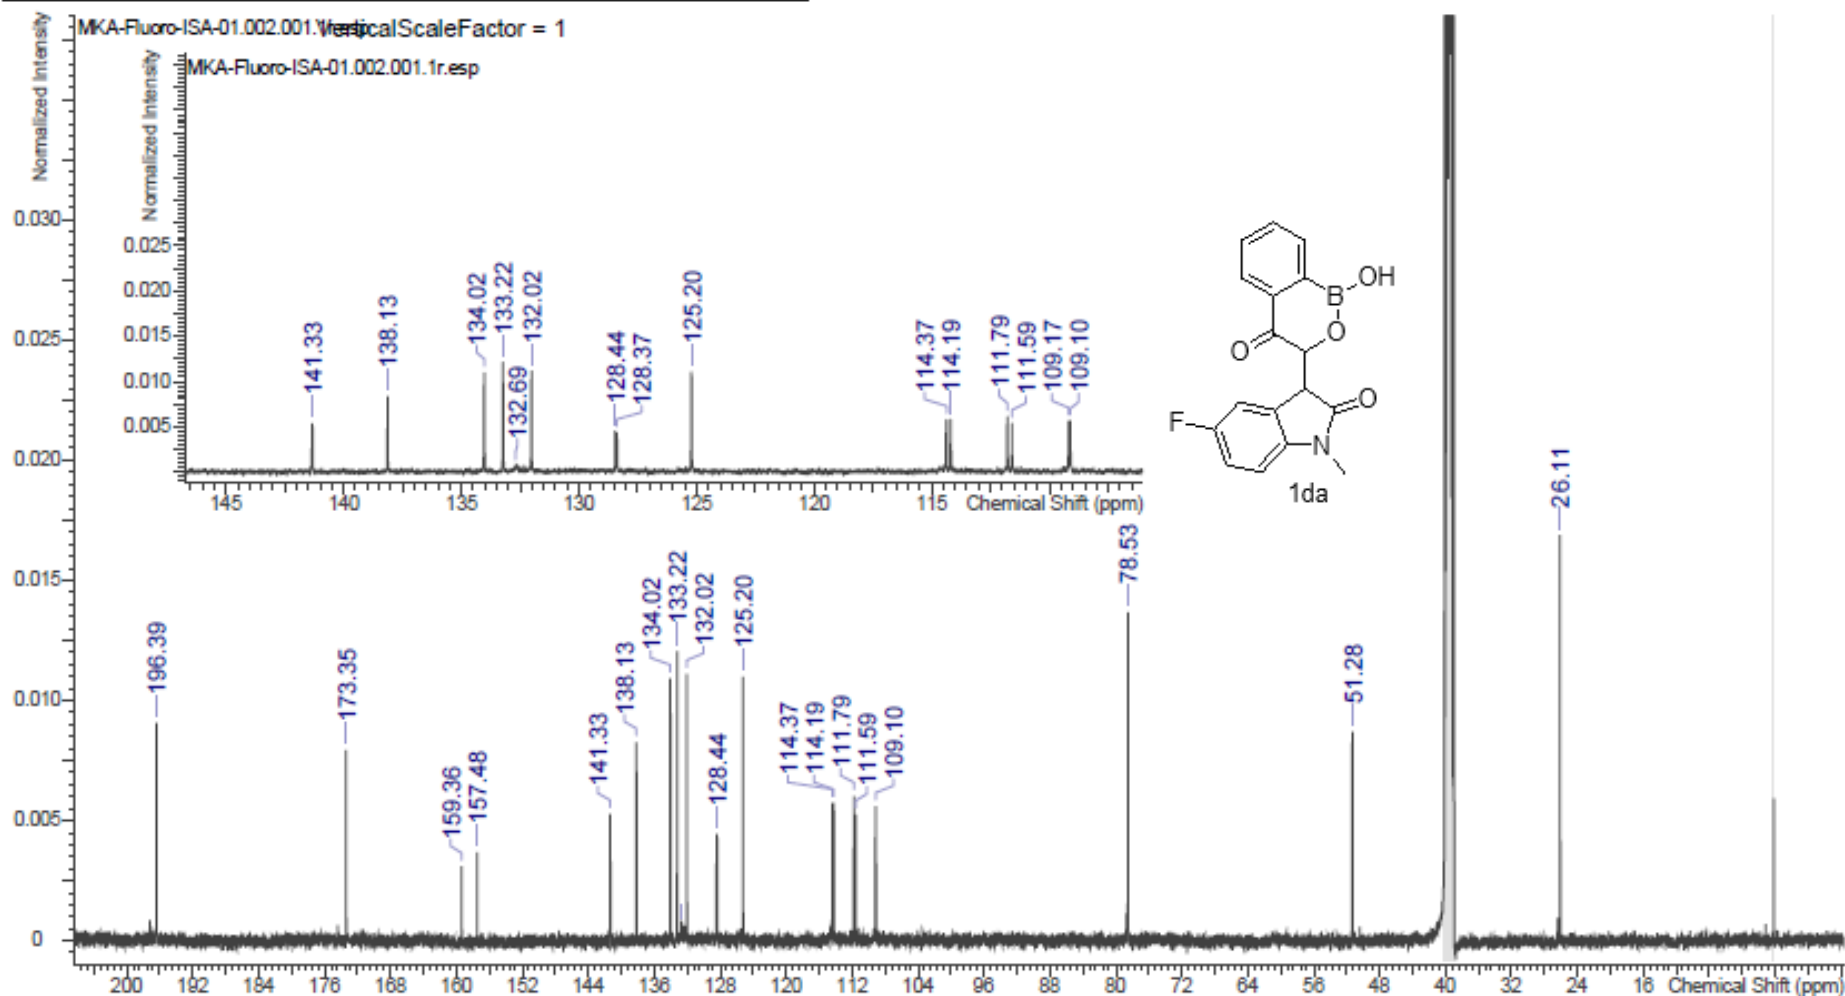

# MKA-Br-ISA-M

16/05/2014 14:37:41

|                                                        |                                                                             |                                       |                                       |                                  |  |
|--------------------------------------------------------|-----------------------------------------------------------------------------|---------------------------------------|---------------------------------------|----------------------------------|--|
| <b>OriginalDateForRelativeTime</b> 2014-04-03T21:50:00 |                                                                             | <b>Multiplets Integrals Sum</b> 23.75 |                                       | <b>Number of Nuclei</b> 24 H's   |  |
| <b>Acquisition Time (sec)</b> 5.3084                   | <b>Comment</b> MKA-Br-ISA-P/DMSO                                            |                                       |                                       | <b>Date</b> 03 Apr 2014 21:50:00 |  |
| <b>Date Stamp</b> 03 Apr 2014 21:50:00                 | <b>File Name</b> C:\Users\kkth216\Desktop\NMR-300\MKA-Br-ISA-P\1\PDATA\1\1r |                                       |                                       |                                  |  |
| <b>Frequency (MHz)</b> 300.13                          | <b>Nucleus</b> 1H                                                           | <b>Number of Transients</b> 126       | <b>Origin</b> av300                   |                                  |  |
| <b>Original Points Count</b> 32768                     | <b>Owner</b> administrator                                                  | <b>Points Count</b> 32768             | <b>Pulse Sequence</b> zg30            |                                  |  |
| <b>Receiver Gain</b> 1625.50                           | <b>SW(cyclical) (Hz)</b> 6172.84                                            | <b>Solvent</b> DMSO-d6                | <b>Spectrum Offset (Hz)</b> 1853.2285 |                                  |  |
| <b>Spectrum Type</b> STANDARD                          | <b>Sweep Width (Hz)</b> 6172.65                                             | <b>Temperature (degree C)</b> 25.000  |                                       |                                  |  |

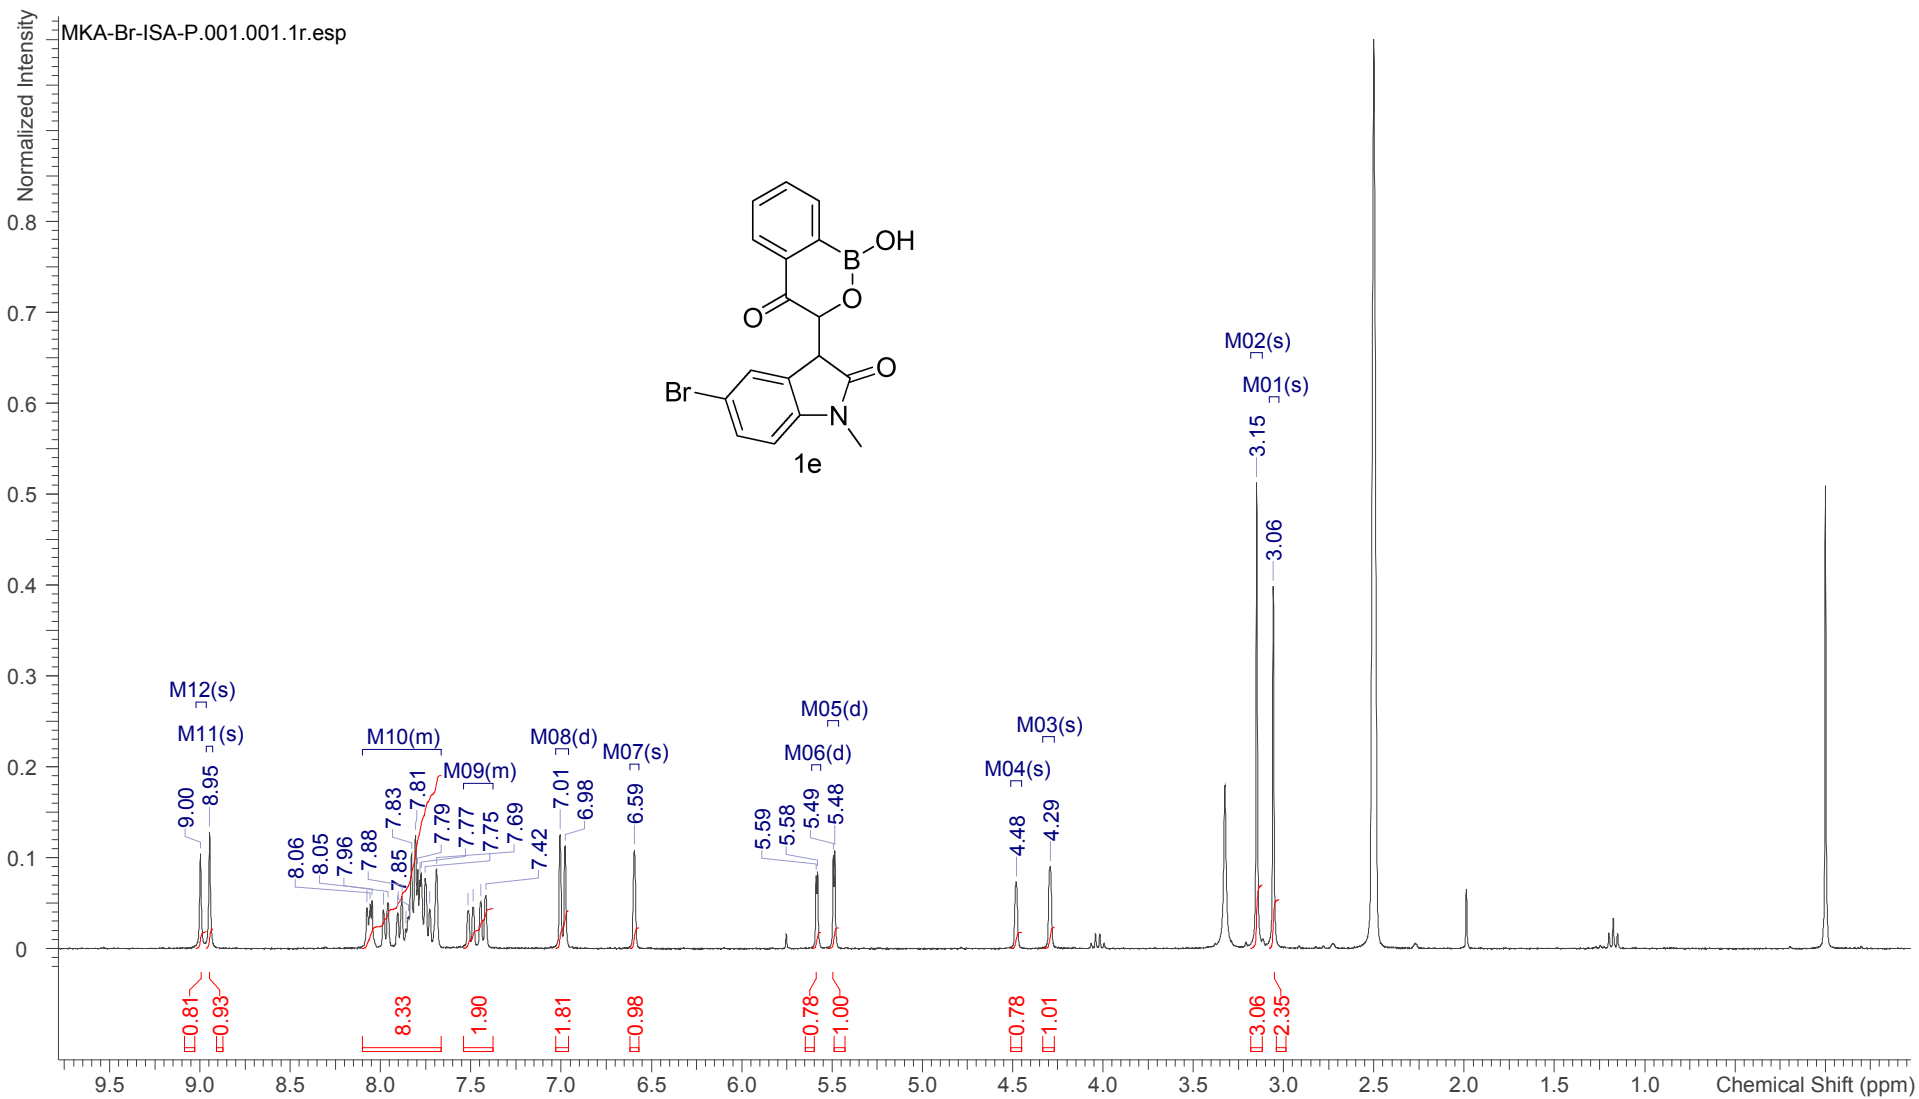

MKA-Br-ISA

3: Diode Array  
Range: 1.059e+2

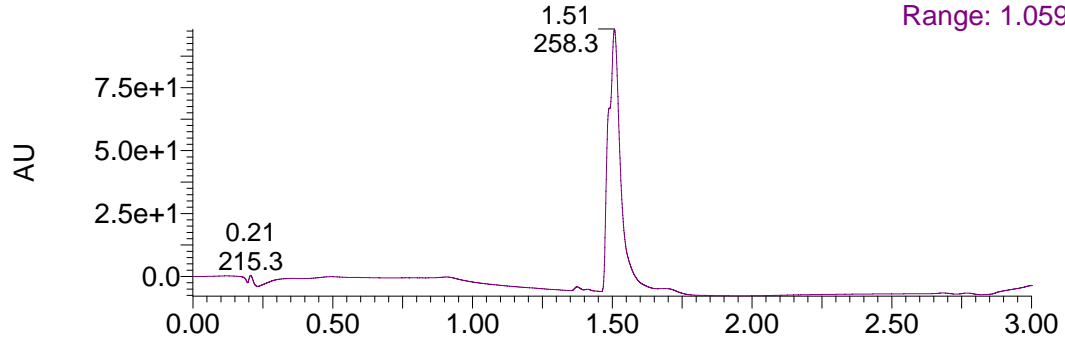

MKA-Br-ISA

2: Scan ES-TIC  
9.63e6

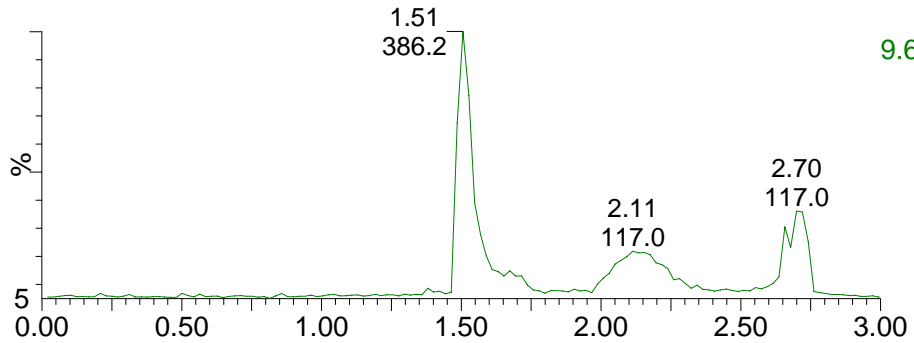

MKA-Br-ISA

1: Scan ES+TIC  
5.85e7

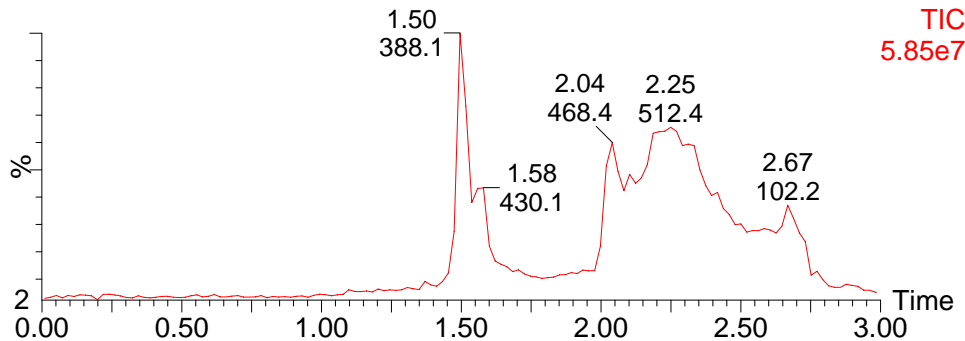

AstraZeneca India

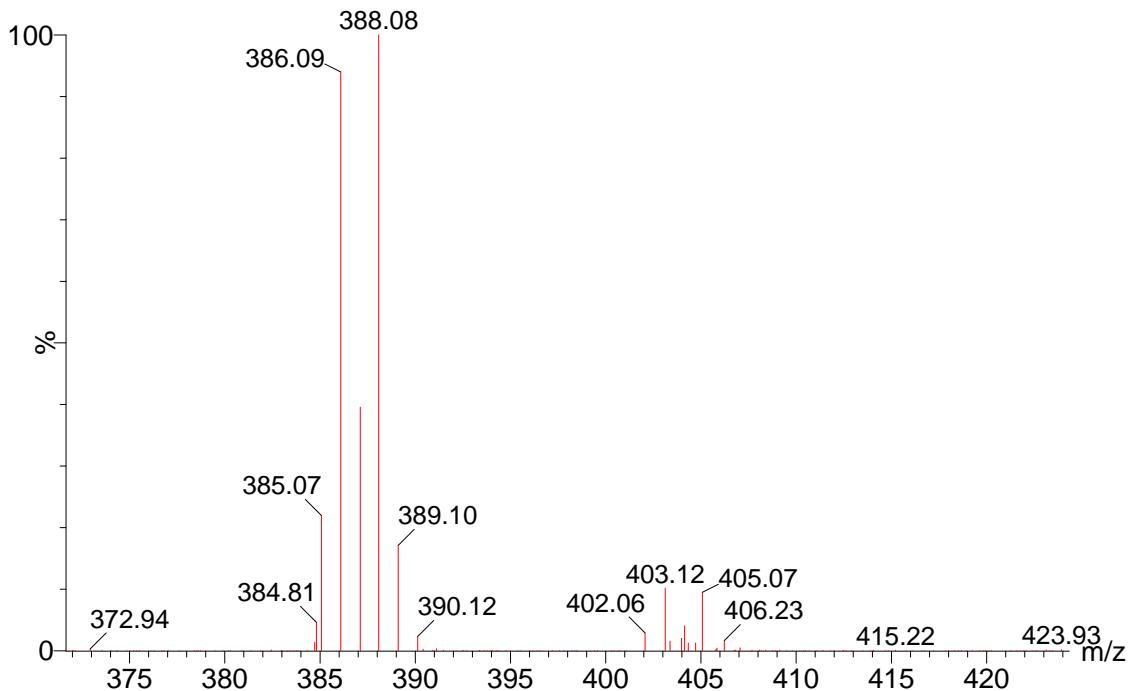



# MKA-Br-ISA-P1

15/05/2014 17:22:24

|                                                                      |                                                                               |                                       |                                   |                                |  |
|----------------------------------------------------------------------|-------------------------------------------------------------------------------|---------------------------------------|-----------------------------------|--------------------------------|--|
| <b>OriginalDateForRelativeTime</b> 2014-05-10T10:42:16               |                                                                               | <b>Multiplets Integrals Sum</b> 12.76 |                                   | <b>Number of Nuclei</b> 13 H's |  |
| <b>Acquisition Time (sec)</b> 3.1719                                 | <b>Comment</b> MKA-Br-ISA-01/DMSO PROTON DMSO {F:\ecm\DATA\2014-04} bionmr 26 |                                       |                                   |                                |  |
| <b>Date</b> 10 May 2014 10:42:16                                     | <b>Date Stamp</b> 10 May 2014 10:42:16                                        |                                       |                                   |                                |  |
| <b>File Name</b> \\inbgrdsfp01\inndata\IMKA\MKA-Br-ISA-01\1\1\1\1\1r | <b>Frequency (MHz)</b> 500.13                                                 |                                       | <b>Nucleus</b> 1H                 |                                |  |
| <b>Number of Transients</b> 16                                       | <b>Origin</b> spect                                                           | <b>Original Points Count</b> 32768    | <b>Owner</b> administrator        |                                |  |
| <b>Points Count</b> 32768                                            | <b>Pulse Sequence</b> zg30                                                    | <b>Receiver Gain</b> 4.00             | <b>SW(cyclical) (Hz)</b> 10330.58 |                                |  |
| <b>Solvent</b> DMSO-d6                                               | <b>Spectrum Offset (Hz)</b> 3092.0627                                         | <b>Spectrum Type</b> STANDARD         | <b>Sweep Width (Hz)</b> 10330.26  |                                |  |
| <b>Temperature (degree C)</b> 25.000                                 |                                                                               |                                       |                                   |                                |  |

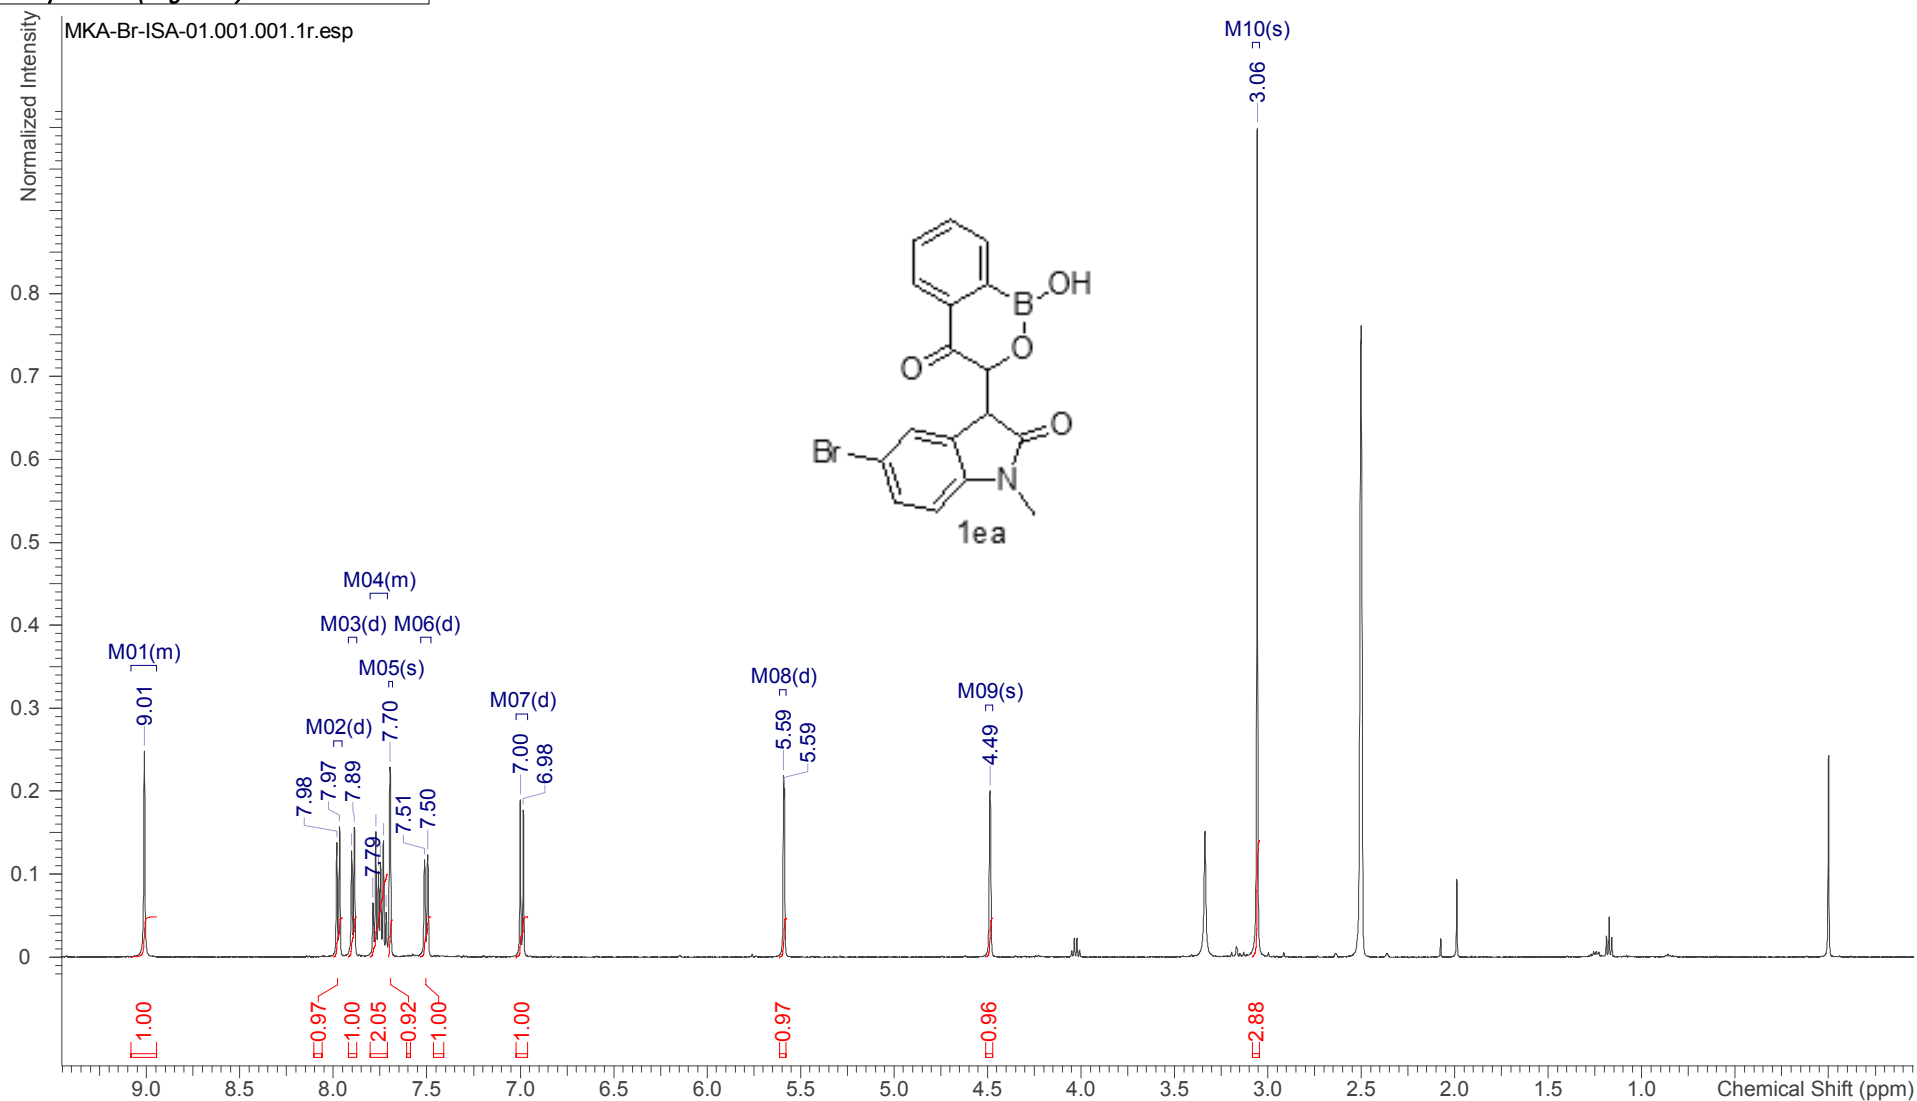

|                                                 |                                                     |                                                                        |            |                        |          |
|-------------------------------------------------|-----------------------------------------------------|------------------------------------------------------------------------|------------|------------------------|----------|
| OriginalDateForRelativeTime 2014-05-10T15:58:00 |                                                     | Multipliers Integrals Sum 0.00                                         |            | Number of Nuclei 0 C's |          |
| Acquisition Time (sec)                          | 1.0912                                              | Comment MKA-Br-ISA-01/DMSO C13CPD DMSO (F:\ecm\DATA\2014-04) bionmr 26 |            |                        |          |
| Date                                            | 10 May 2014 15:58:00                                | Date Stamp                                                             |            | 10 May 2014 15:58:00   |          |
| File Name                                       | \\nbgrdsfp01\in\data\MKA\MKA-Br-ISA-01\2\PDATA\1\1r | Frequency (MHz)                                                        | 125.77     | Nucleus                | 13C      |
| Number of Transients                            | 6000                                                | Origin                                                                 | spect      | Original Points Count  | 32768    |
| Points Count                                    | 32768                                               | Pulse Sequence                                                         | zgpg30     | Receiver Gain          | 32768.00 |
| Solvent                                         | DMSO-d6                                             | Spectrum Offset (Hz)                                                   | 12519.3086 | Spectrum Type          | STANDARD |
| Temperature (degree C)                          | 25.000                                              | Sweep Width (Hz)                                                       |            | 30029.11               |          |

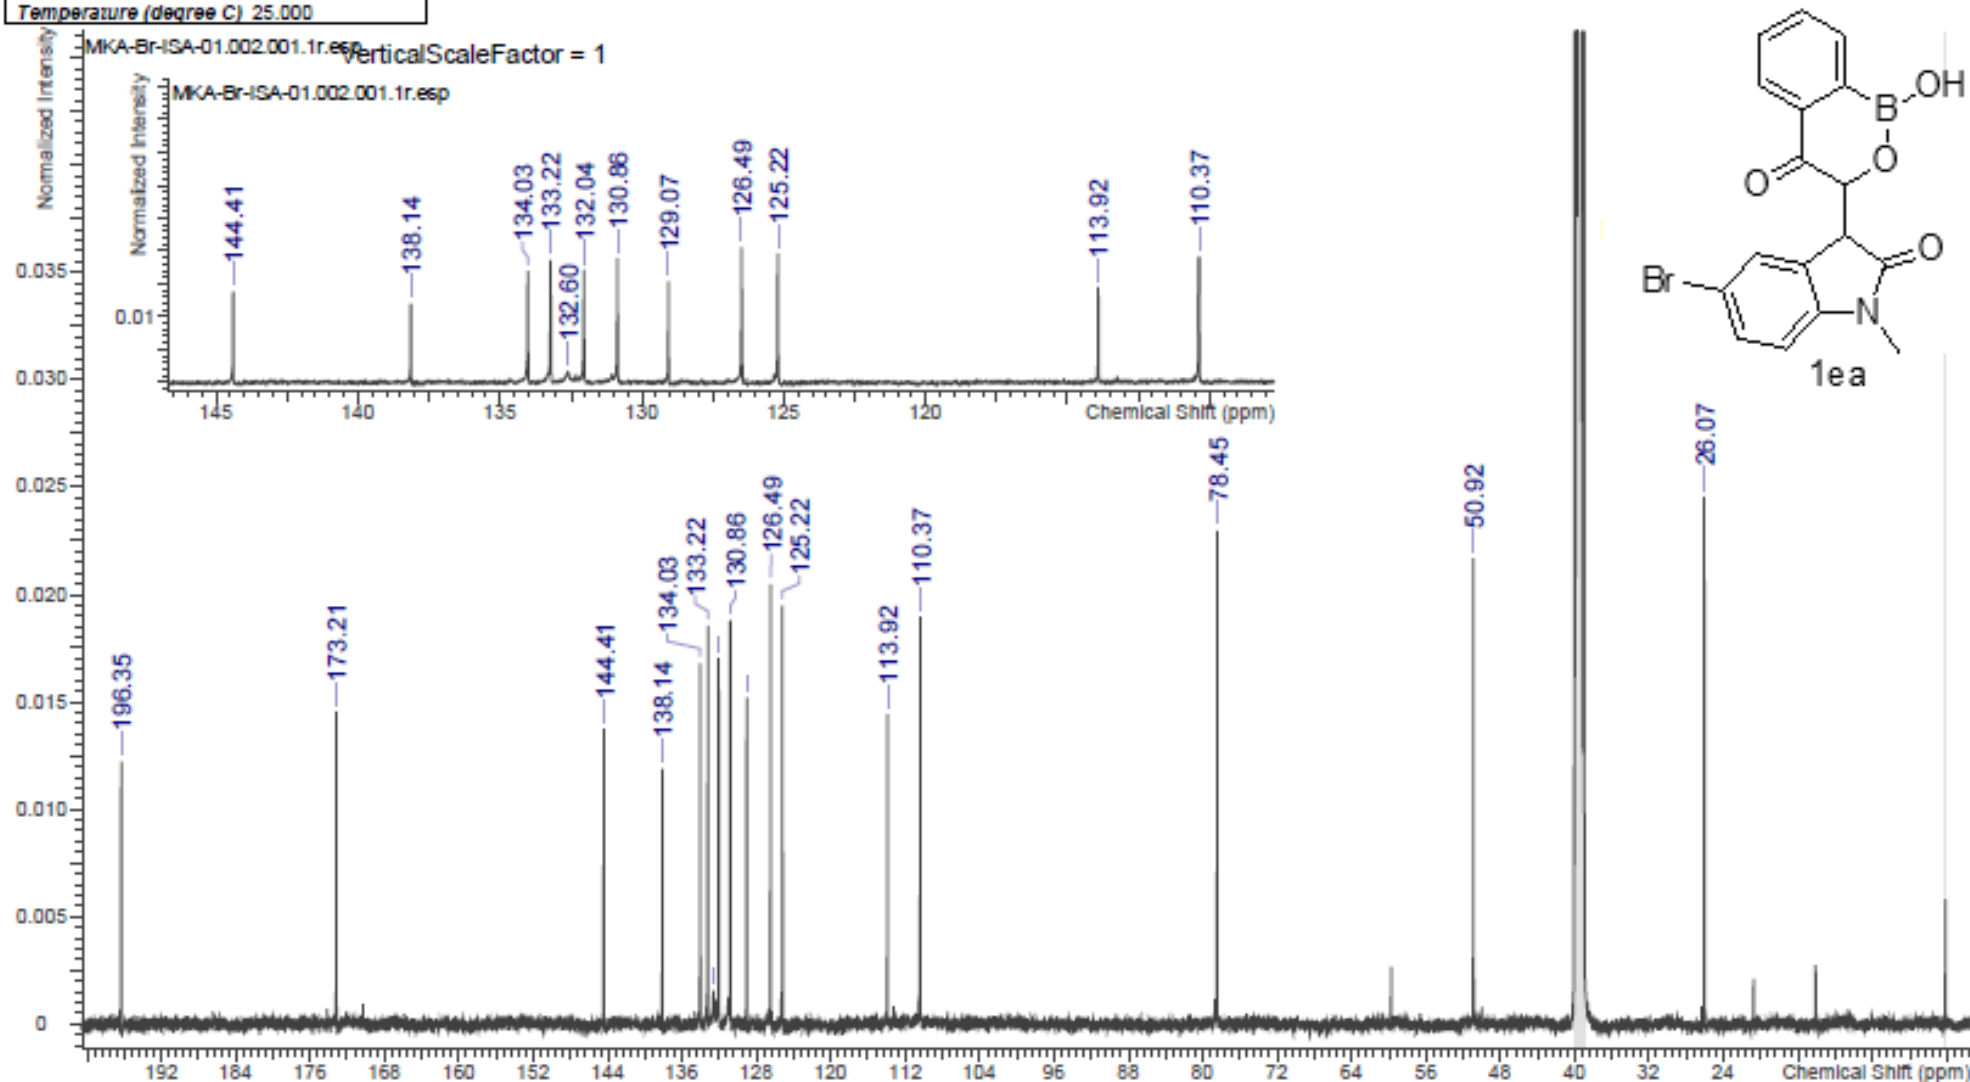

# MKA-CH3-ISA-M

16/05/2014 14:35:13

|                                    |                      |                                 |                                                             |                               |                      |
|------------------------------------|----------------------|---------------------------------|-------------------------------------------------------------|-------------------------------|----------------------|
| <b>OriginalDateForRelativeTime</b> | 2014-04-12T12:46:00  | <b>Multiplets Integrals Sum</b> | 27.36                                                       | <b>Number of Nuclei</b>       | 29 H's               |
| <b>Acquisition Time (sec)</b>      | 5.3084               | <b>Comment</b>                  | MKA-CH3-ISA-M/DMSO                                          | <b>Date</b>                   | 12 Apr 2014 12:46:00 |
| <b>Date Stamp</b>                  | 12 Apr 2014 12:46:00 | <b>File Name</b>                | C:\Users\kkth216\Desktop\NMR-300\MKA-CH3-ISA-M\2\PDATA\1\1r |                               |                      |
| <b>Frequency (MHz)</b>             | 300.13               | <b>Nucleus</b>                  | 1H                                                          | <b>Number of Transients</b>   | 126                  |
| <b>Original Points Count</b>       | 32768                | <b>Owner</b>                    | administrator                                               | <b>Points Count</b>           | 32768                |
| <b>Receiver Gain</b>               | 1625.50              | <b>SW(cyclical) (Hz)</b>        | 6172.84                                                     | <b>Solvent</b>                | DMSO-d6              |
| <b>Spectrum Type</b>               | STANDARD             | <b>Sweep Width (Hz)</b>         | 6172.65                                                     | <b>Temperature (degree C)</b> | 25.000               |
|                                    |                      |                                 |                                                             | <b>Spectrum Offset (Hz)</b>   | 1853.3098            |

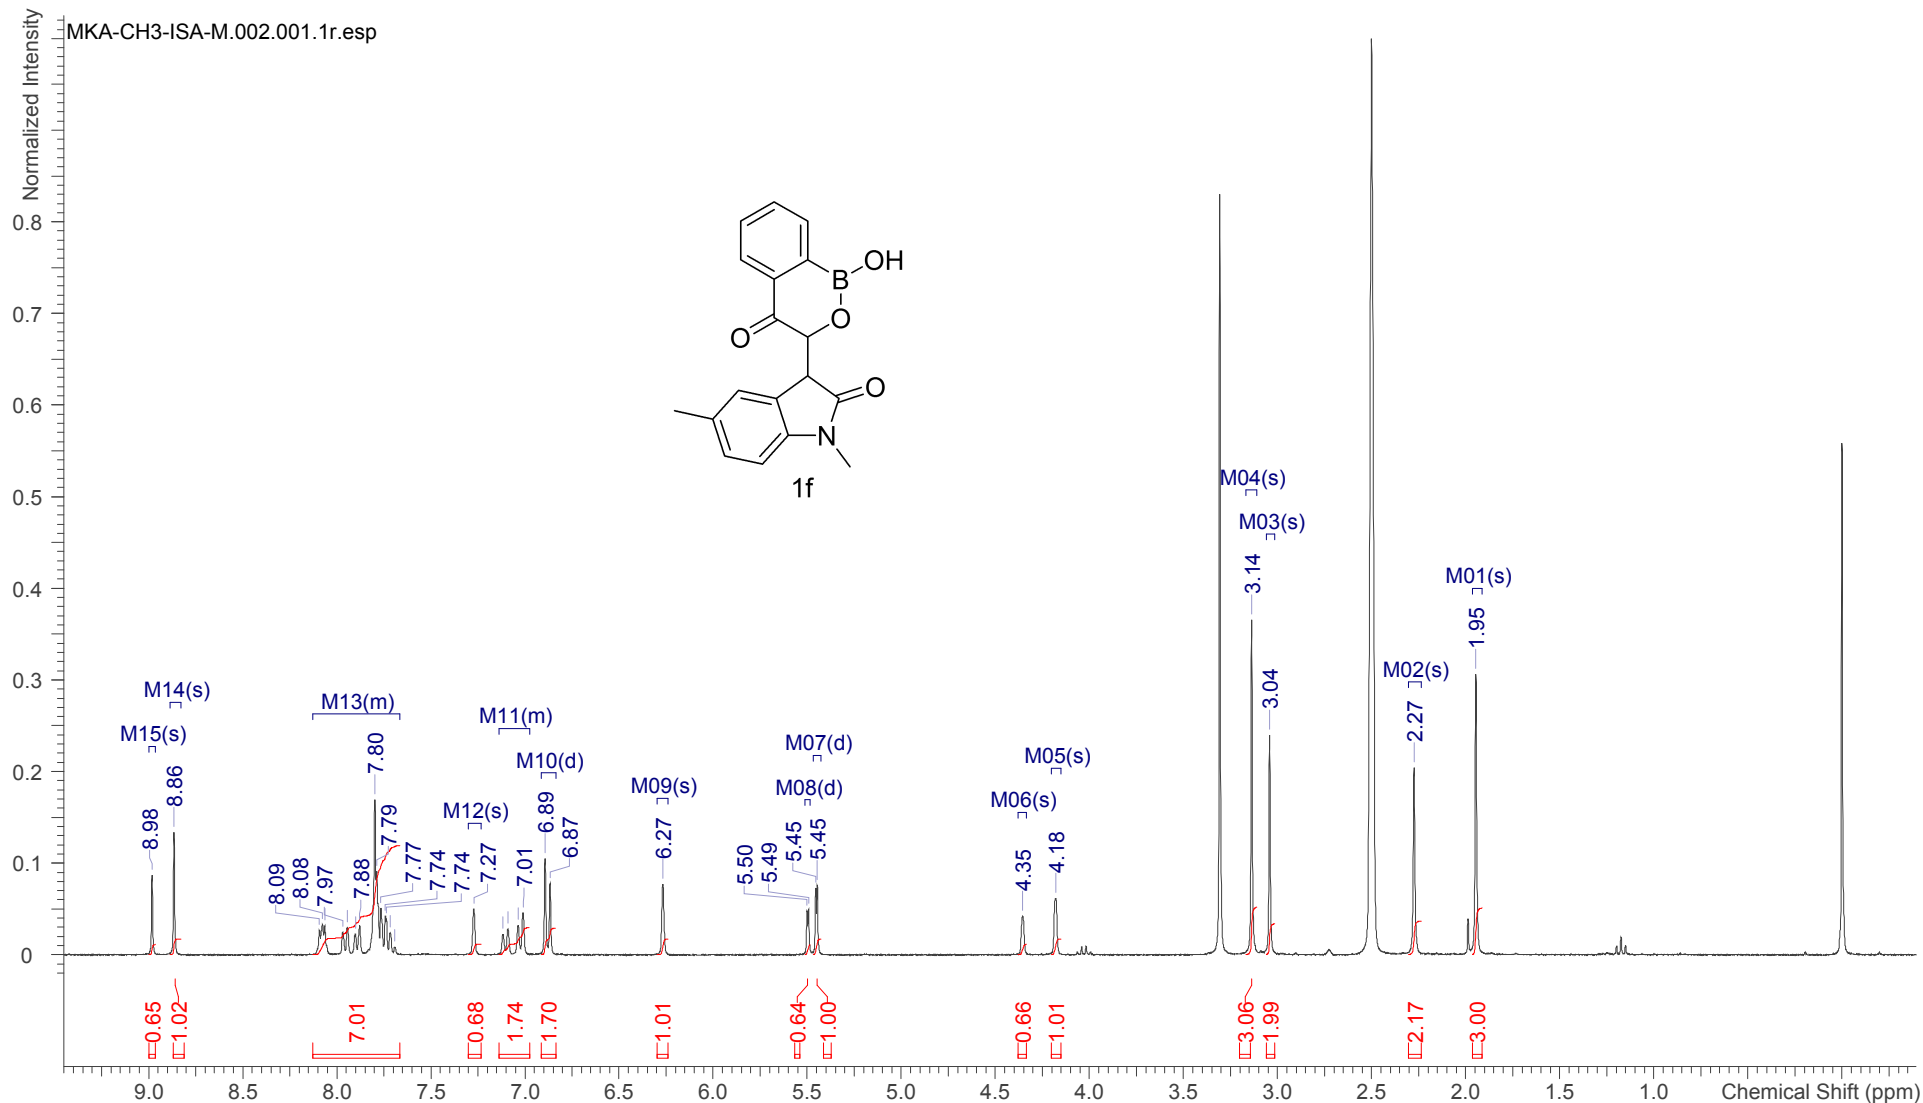

MKA-CH3-ISA

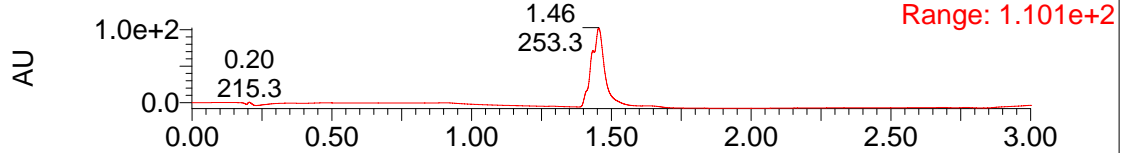

MKA-CH3-ISA

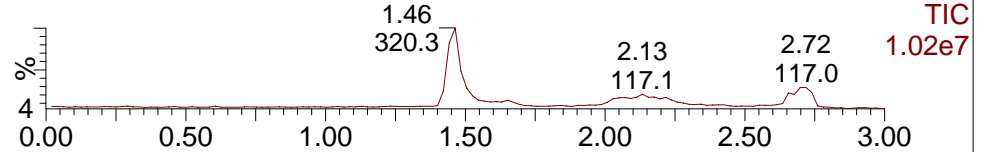

MKA-CH3-ISA

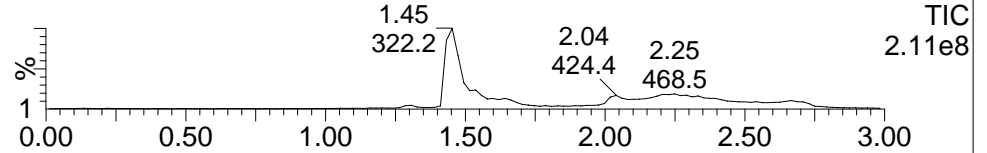

MKA-CH3-ISA

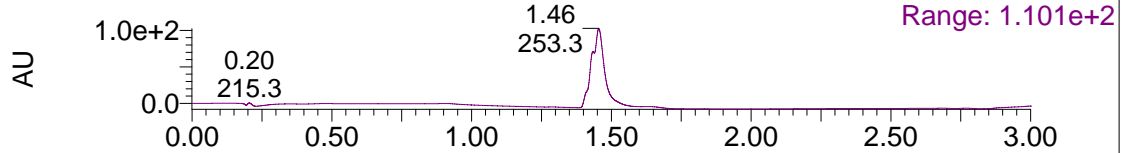

MKA-CH3-ISA

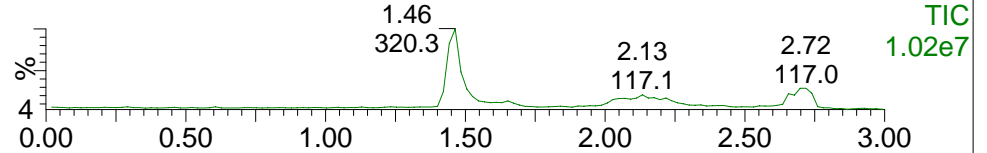

MKA-CH3-ISA

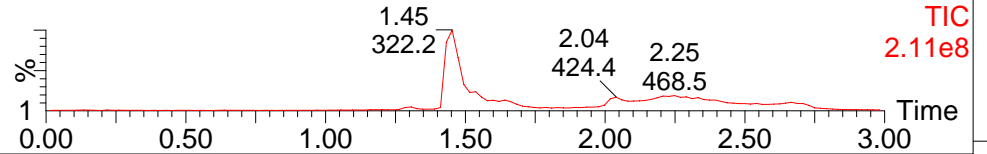

AstraZeneca India

16:05:09  
07-Apr-2014

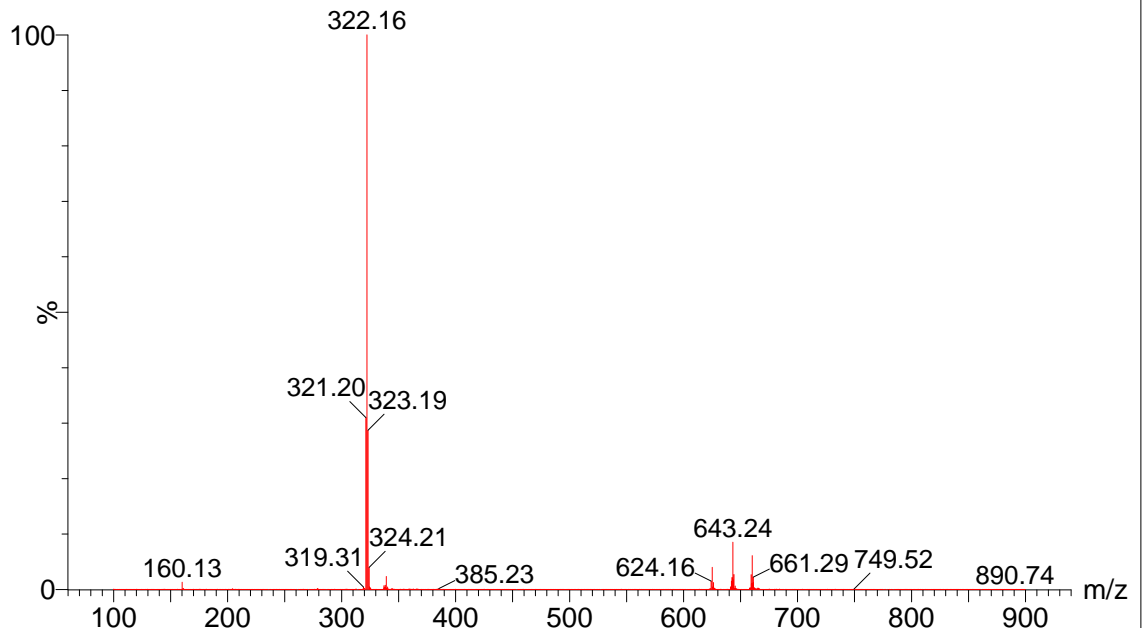

# MKA-CH3-ISA-P1

15/05/2014 17:58:03

|                                                                          |                                                                                |                                       |                   |                                   |  |
|--------------------------------------------------------------------------|--------------------------------------------------------------------------------|---------------------------------------|-------------------|-----------------------------------|--|
| <b>OriginalDateForRelativeTime</b> 2014-05-08T14:41:12                   |                                                                                | <b>Multiplets Integrals Sum</b> 14.16 |                   | <b>Number of Nuclei</b> 16 H's    |  |
| <b>Acquisition Time (sec)</b> 3.1719                                     | <b>Comment</b> MKA-CH3-ISA-01/DMSO PROTON DMSO {F:\ecm\DATA\2014-04} bionmr 22 |                                       |                   |                                   |  |
| <b>Date</b> 08 May 2014 14:41:12                                         | <b>Date Stamp</b> 08 May 2014 14:41:12                                         |                                       |                   |                                   |  |
| <b>File Name</b> \\inbgrdsfp01\inidata\MKA\MKA-CH3-ISA-01\1\1\PDATA\1\1r | <b>Frequency (MHz)</b> 500.13                                                  |                                       | <b>Nucleus</b> 1H |                                   |  |
| <b>Number of Transients</b> 16                                           | <b>Origin</b> spect                                                            | <b>Original Points Count</b> 32768    |                   | <b>Owner</b> administrator        |  |
| <b>Points Count</b> 32768                                                | <b>Pulse Sequence</b> zg30                                                     | <b>Receiver Gain</b> 4.00             |                   | <b>SW(cyclical) (Hz)</b> 10330.58 |  |
| <b>Solvent</b> DMSO-d6                                                   | <b>Spectrum Offset (Hz)</b> 3090.3782                                          | <b>Spectrum Type</b> STANDARD         |                   | <b>Sweep Width (Hz)</b> 10330.26  |  |
| <b>Temperature (degree C)</b> 25.000                                     |                                                                                |                                       |                   |                                   |  |

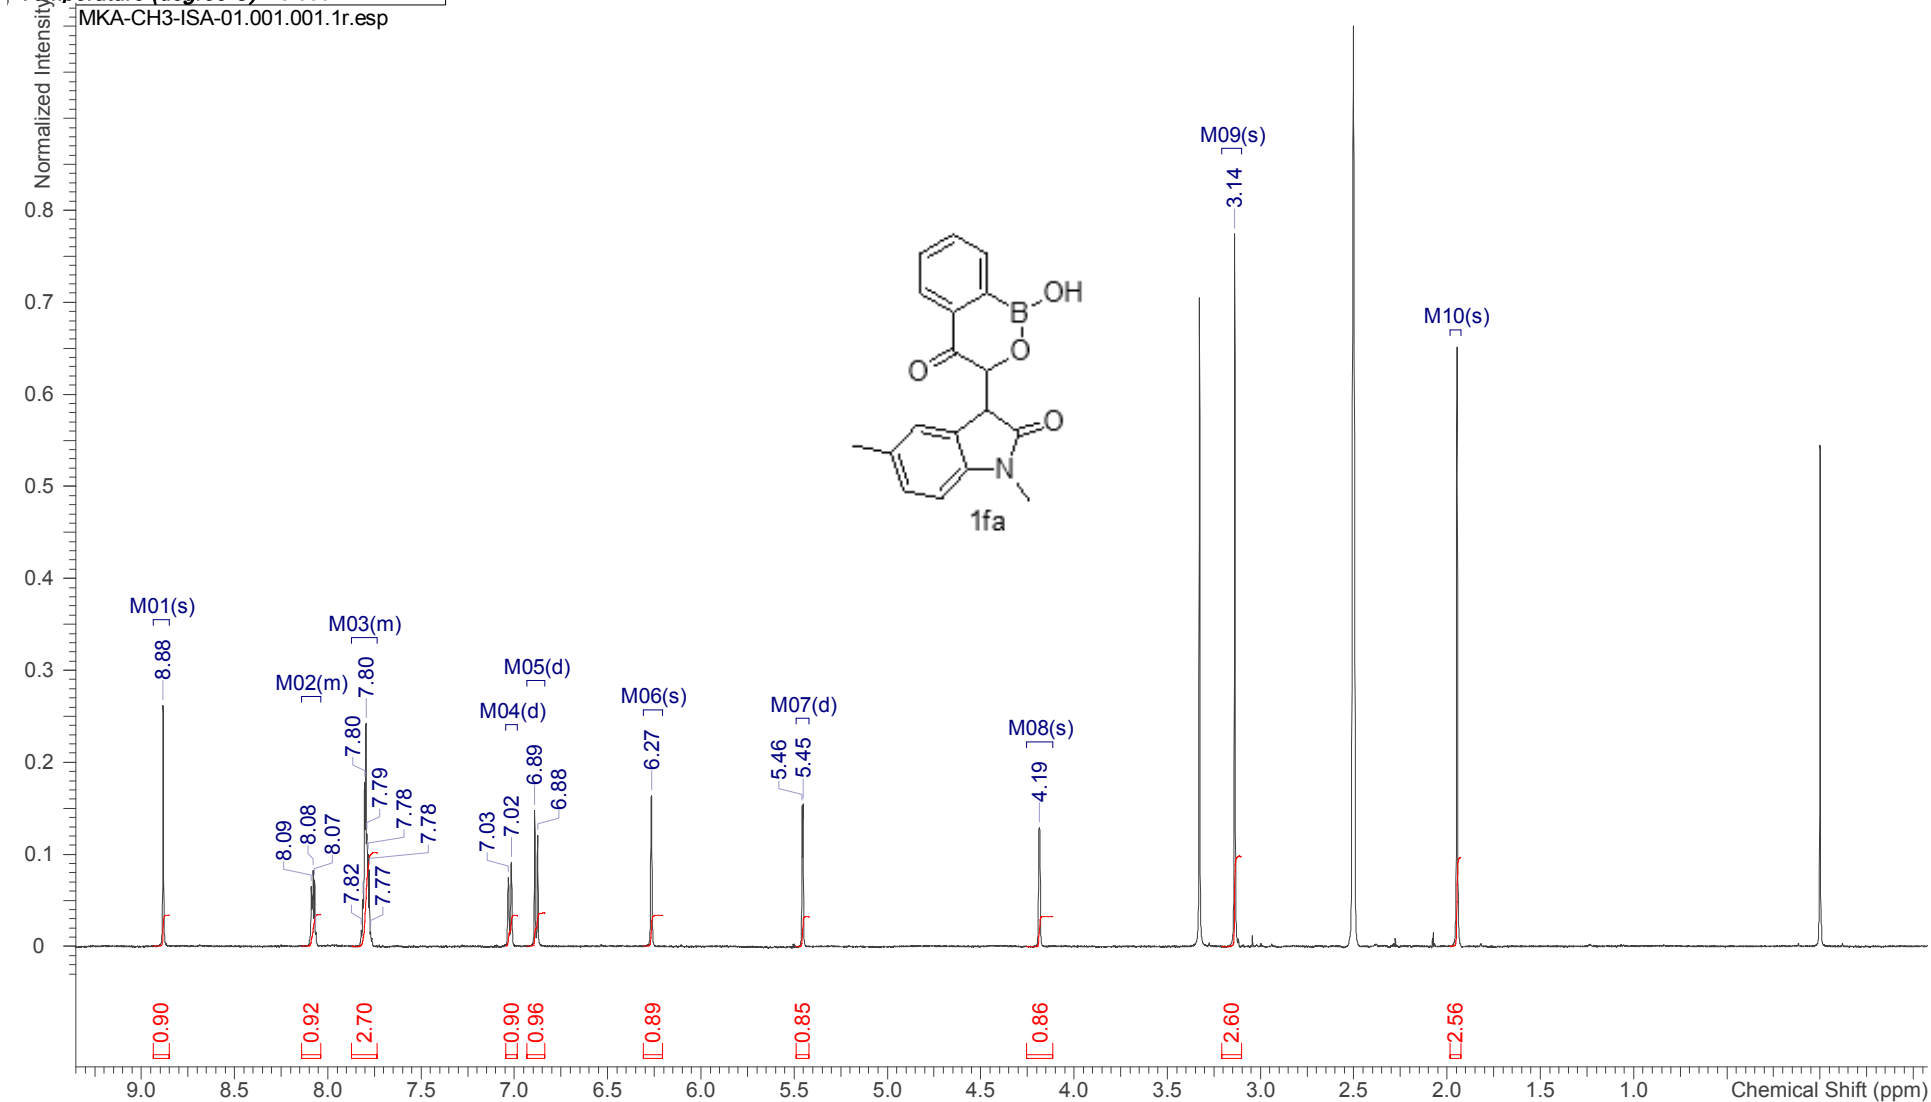

|                             |                                                               |                          |                                                                 |                       |            |
|-----------------------------|---------------------------------------------------------------|--------------------------|-----------------------------------------------------------------|-----------------------|------------|
| OriginalDateForRelativeTime | 2014-05-08T23:28:08                                           | Multiplets Integrals Sum | 0.00                                                            | Number of Nuclei      | 0 C's      |
| Acquisition Time (sec)      | 1.0912                                                        | Comment                  | MKA-CH3-ISA-01/DMSO C13CPD DMSO (F:\ecm\DATA\2014-04) bionnr 22 |                       |            |
| Date                        | 08 May 2014 23:28:08                                          | Date Stamp               | 08 May 2014 23:28:08                                            |                       |            |
| File Name                   | \in\bgrdsfp01\indata\MKA\07052014\MKA-CH3-ISA-01\2\PDATA\1\1r |                          |                                                                 | Frequency (MHz)       | 125.77     |
| Nucleus                     | 13C                                                           | Number of Transients     | 10000                                                           | Origin                | spect      |
| Owner                       | administrator                                                 | Points Count             | 32768                                                           | Original Points Count | 32768      |
| SW(cyclical) (Hz)           | 30030.03                                                      | Solvent                  | DMSO-d6                                                         | Pulse Sequence        | zpgg30     |
| Sweep Width (Hz)            | 30029.11                                                      | Temperature (degree C)   | 25.000                                                          | Spectrum Offset (Hz)  | 12503.5010 |
|                             |                                                               |                          |                                                                 | Receiver Gain         | 32768.00   |
|                             |                                                               |                          |                                                                 | Spectrum Type         | STANDARD   |

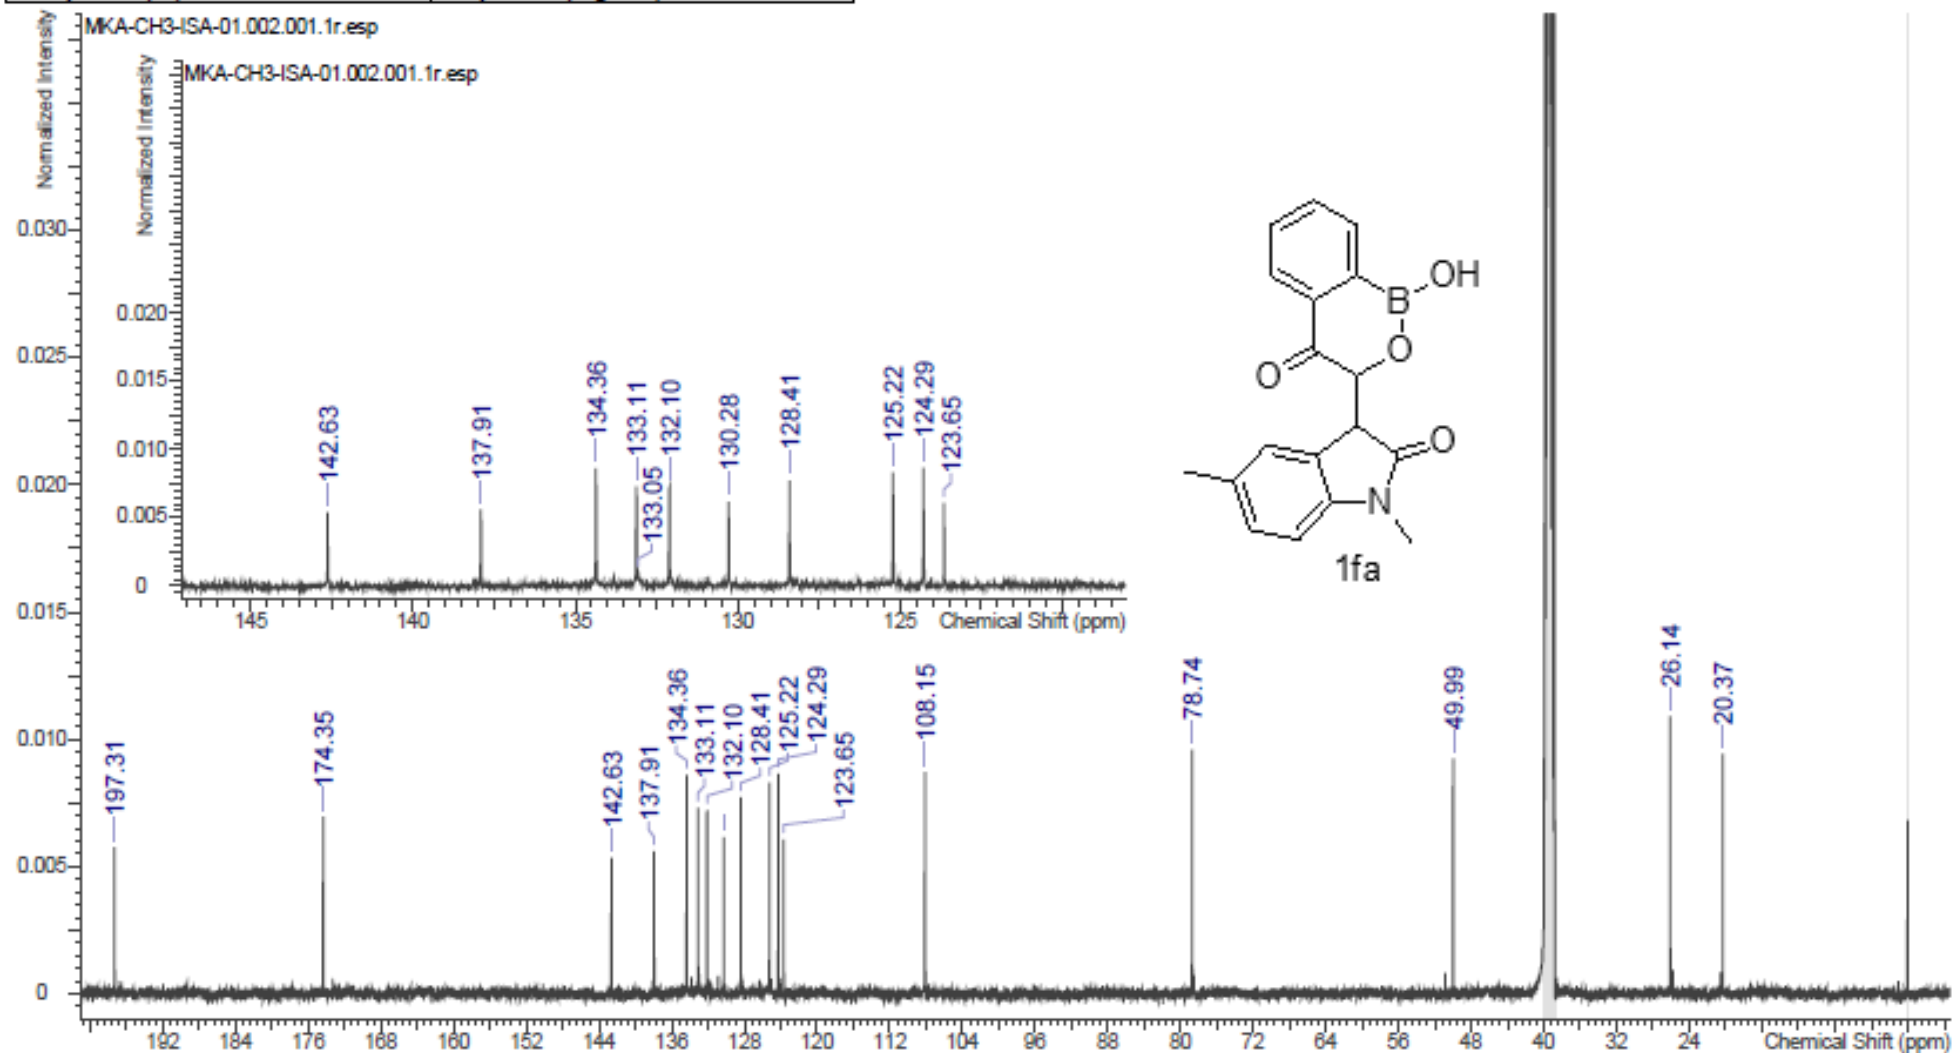

|                                                        |                                                                   |                                       |                                      |                                  |  |
|--------------------------------------------------------|-------------------------------------------------------------------|---------------------------------------|--------------------------------------|----------------------------------|--|
| <b>OriginalDateForRelativeTime</b> 2014-04-18T09:34:00 |                                                                   | <b>Multiplets Integrals Sum</b> 14.85 |                                      | <b>Number of Nuclei</b> 15 H's   |  |
| <b>Acquisition Time (sec)</b> 1.9923                   | <b>Comment</b> MKA-1043-68 PROTON CDCl3 {D:1RA} SamTrack 43       |                                       |                                      | <b>Date</b> 18 Apr 2014 09:34:00 |  |
| <b>Date Stamp</b> 18 Apr 2014 09:34:00                 | <b>File Name</b> \\inbgrdsp01\lndata\MKA\MKA-1043-68\1\PDATA\1\1r |                                       |                                      |                                  |  |
| <b>Frequency (MHz)</b> 400.13                          | <b>Nucleus</b> 1H                                                 | <b>Number of Transients</b> 16        | <b>Origin</b> spect                  |                                  |  |
| <b>Original Points Count</b> 16384                     | <b>Owner</b> nmrsu                                                | <b>Points Count</b> 16384             | <b>Pulse Sequence</b> zg30           |                                  |  |
| <b>Receiver Gain</b> 161.00                            | <b>SW(cyclical) (Hz)</b> 8223.68                                  | <b>Solvent</b> CHLOROFORM-d           |                                      |                                  |  |
| <b>Spectrum Offset (Hz)</b> 2465.5046                  | <b>Spectrum Type</b> STANDARD                                     | <b>Sweep Width (Hz)</b> 8223.18       | <b>Temperature (degree C)</b> 27.000 |                                  |  |

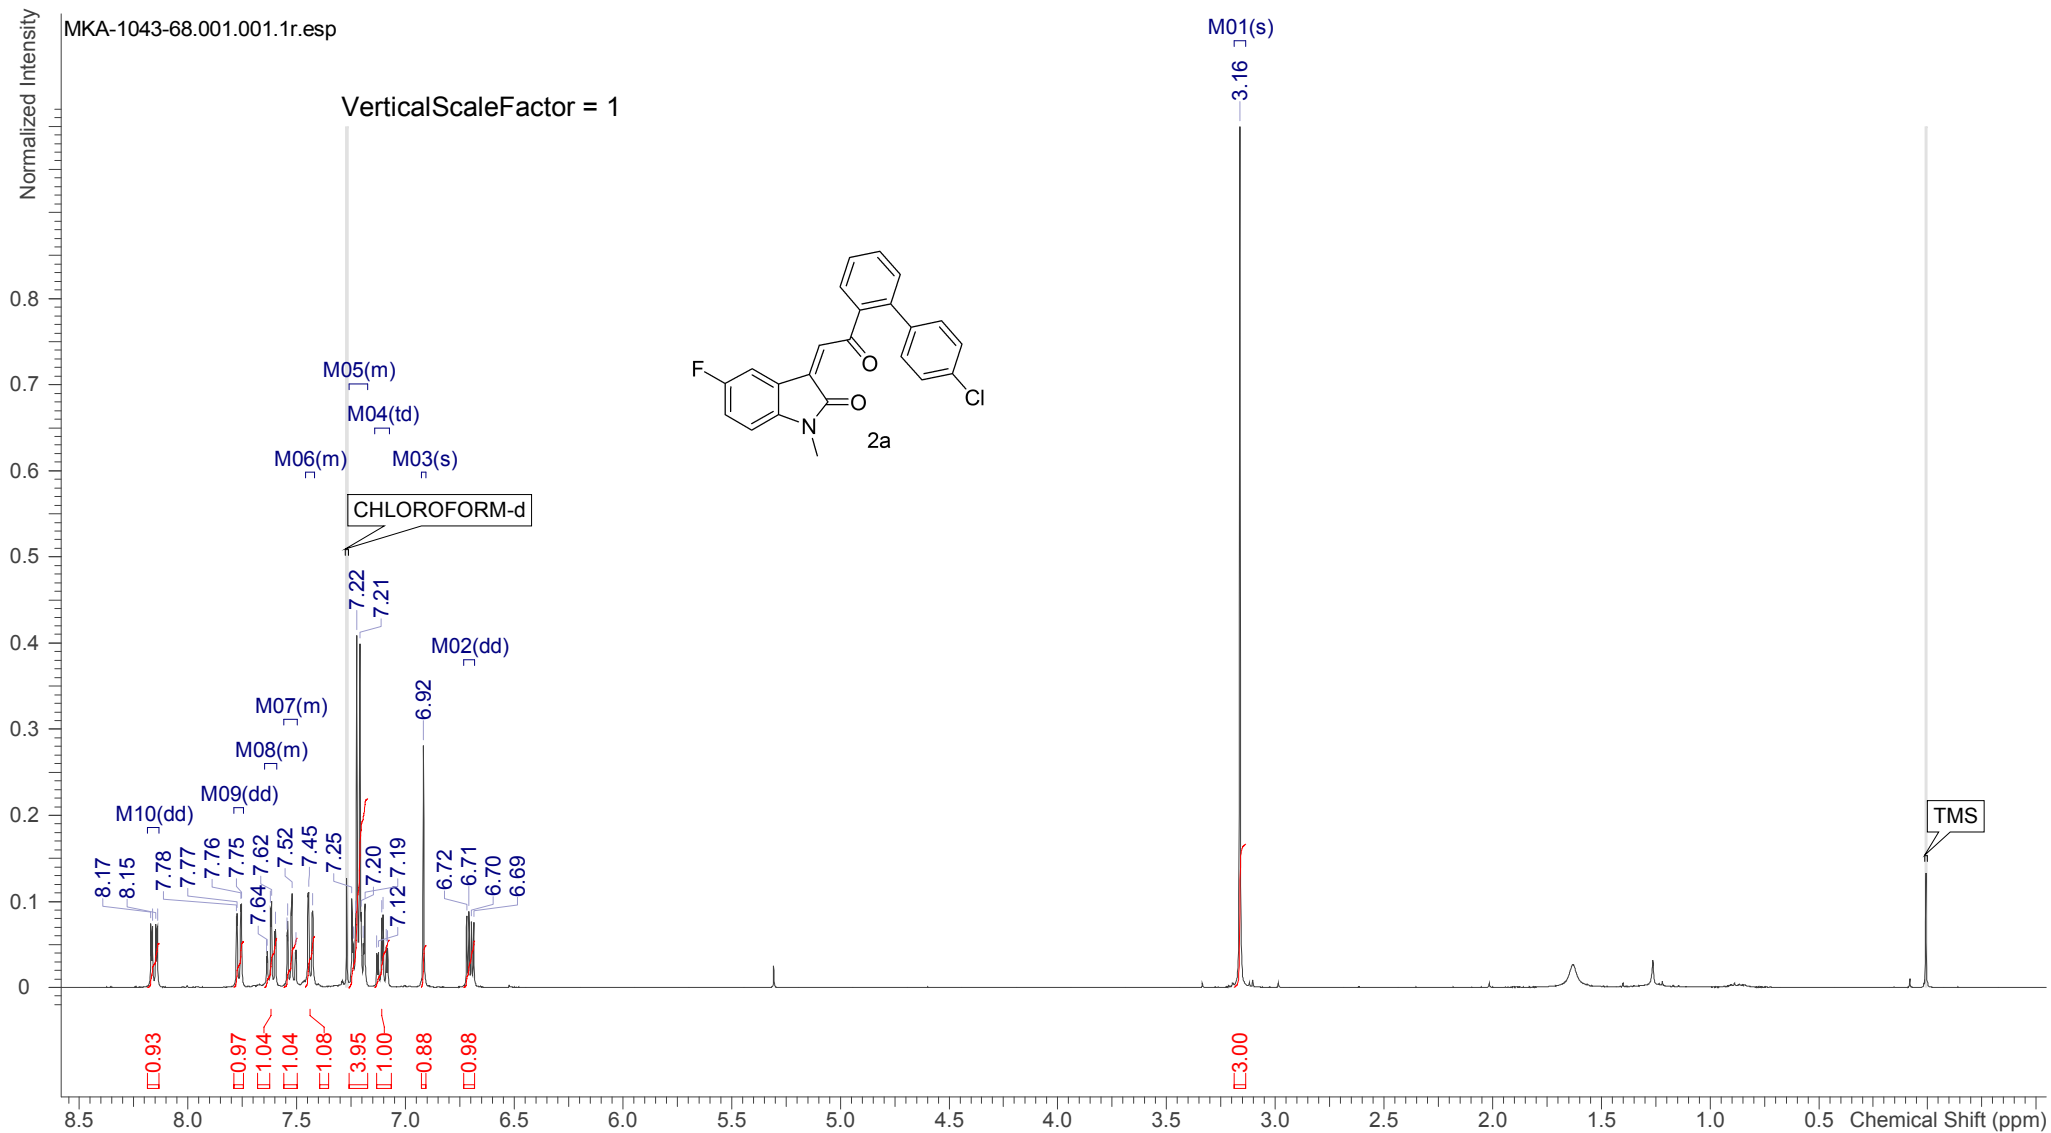

|                                                        |                                                                     |                                      |                                      |                                  |  |
|--------------------------------------------------------|---------------------------------------------------------------------|--------------------------------------|--------------------------------------|----------------------------------|--|
| <b>OriginalDateForRelativeTime</b> 2014-04-18T12:24:40 |                                                                     | <b>Multiplets Integrals Sum</b> 0.00 |                                      | <b>Number of Nuclei</b> 0 C's    |  |
| <b>Acquisition Time (sec)</b> 1.3631                   | <b>Comment</b> MKA-1043-68 C13CPD CDCl3 {D:IRA} SamTrack 43         |                                      |                                      | <b>Date</b> 18 Apr 2014 12:24:40 |  |
| <b>Date Stamp</b> 18 Apr 2014 12:24:40                 | <b>File Name</b> \\inbgrdsfp01\elndata\MKA\MKA-1043-68\2\PDATA\1\1r |                                      |                                      |                                  |  |
| <b>Frequency (MHz)</b> 100.62                          | <b>Nucleus</b> 13C                                                  | <b>Number of Transients</b> 3000     | <b>Origin</b> spect                  |                                  |  |
| <b>Original Points Count</b> 32768                     | <b>Owner</b> nmrsu                                                  | <b>Points Count</b> 32768            | <b>Pulse Sequence</b> zgpg30         |                                  |  |
| <b>Receiver Gain</b> 406.00                            | <b>SW(cyclical) (Hz)</b> 24038.46                                   | <b>Solvent</b> CHLOROFORM-d          |                                      |                                  |  |
| <b>Spectrum Offset (Hz)</b> 10059.1504                 | <b>Spectrum Type</b> STANDARD                                       | <b>Sweep Width (Hz)</b> 24037.73     | <b>Temperature (degree C)</b> 27.000 |                                  |  |

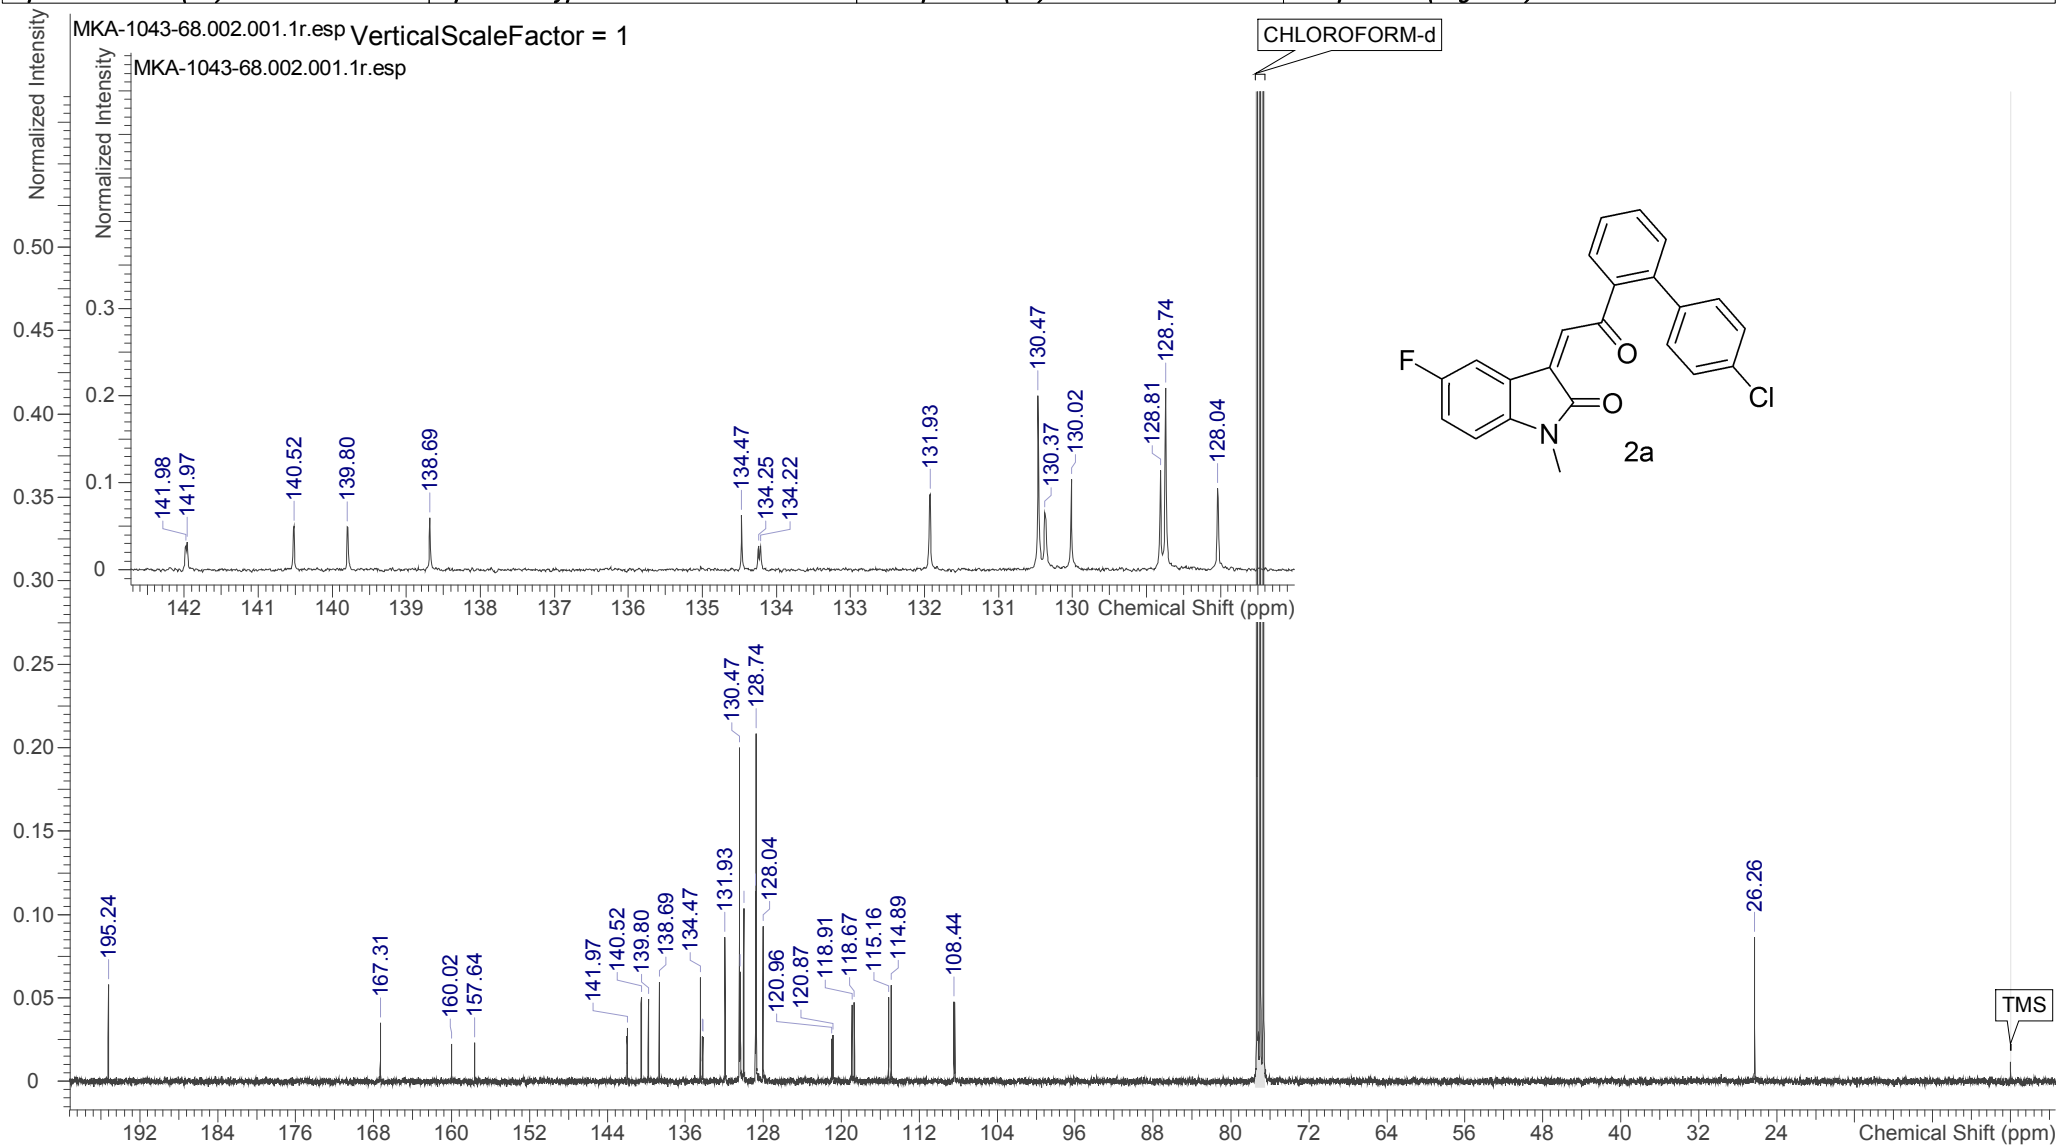



|                                                        |                                                                    |                                       |                                      |                                  |  |
|--------------------------------------------------------|--------------------------------------------------------------------|---------------------------------------|--------------------------------------|----------------------------------|--|
| <i>OriginalDateForRelativeTime</i> 2014-04-18T12:28:56 |                                                                    | <i>Multiplets Integrals Sum</i> 13.76 |                                      | <i>Number of Nuclei</i> 15 H's   |  |
| <i>Acquisition Time (sec)</i> 1.9923                   | <i>Comment</i> MKA-1043-86 PROTON CDCl3 {D:IRA} SamTrack 44        |                                       |                                      | <i>Date</i> 18 Apr 2014 12:28:56 |  |
| <i>Date Stamp</i> 18 Apr 2014 12:28:56                 | <i>File Name</i> \\inbgrdsp01\elndata\MKA\MKA-1043-86\1\PDATA\1\1r |                                       |                                      |                                  |  |
| <i>Frequency (MHz)</i> 400.13                          | <i>Nucleus</i> 1H                                                  | <i>Number of Transients</i> 16        | <i>Origin</i> spect                  |                                  |  |
| <i>Original Points Count</i> 16384                     | <i>Owner</i> nmrsu                                                 | <i>Points Count</i> 16384             | <i>Pulse Sequence</i> zg30           |                                  |  |
| <i>Receiver Gain</i> 203.00                            | <i>SW(cyclical) (Hz)</i> 8223.68                                   | <i>Solvent</i> CHLOROFORM-d           |                                      |                                  |  |
| <i>Spectrum Offset (Hz)</i> 2463.2405                  | <i>Spectrum Type</i> STANDARD                                      | <i>Sweep Width (Hz)</i> 8223.18       | <i>Temperature (degree C)</i> 27.000 |                                  |  |

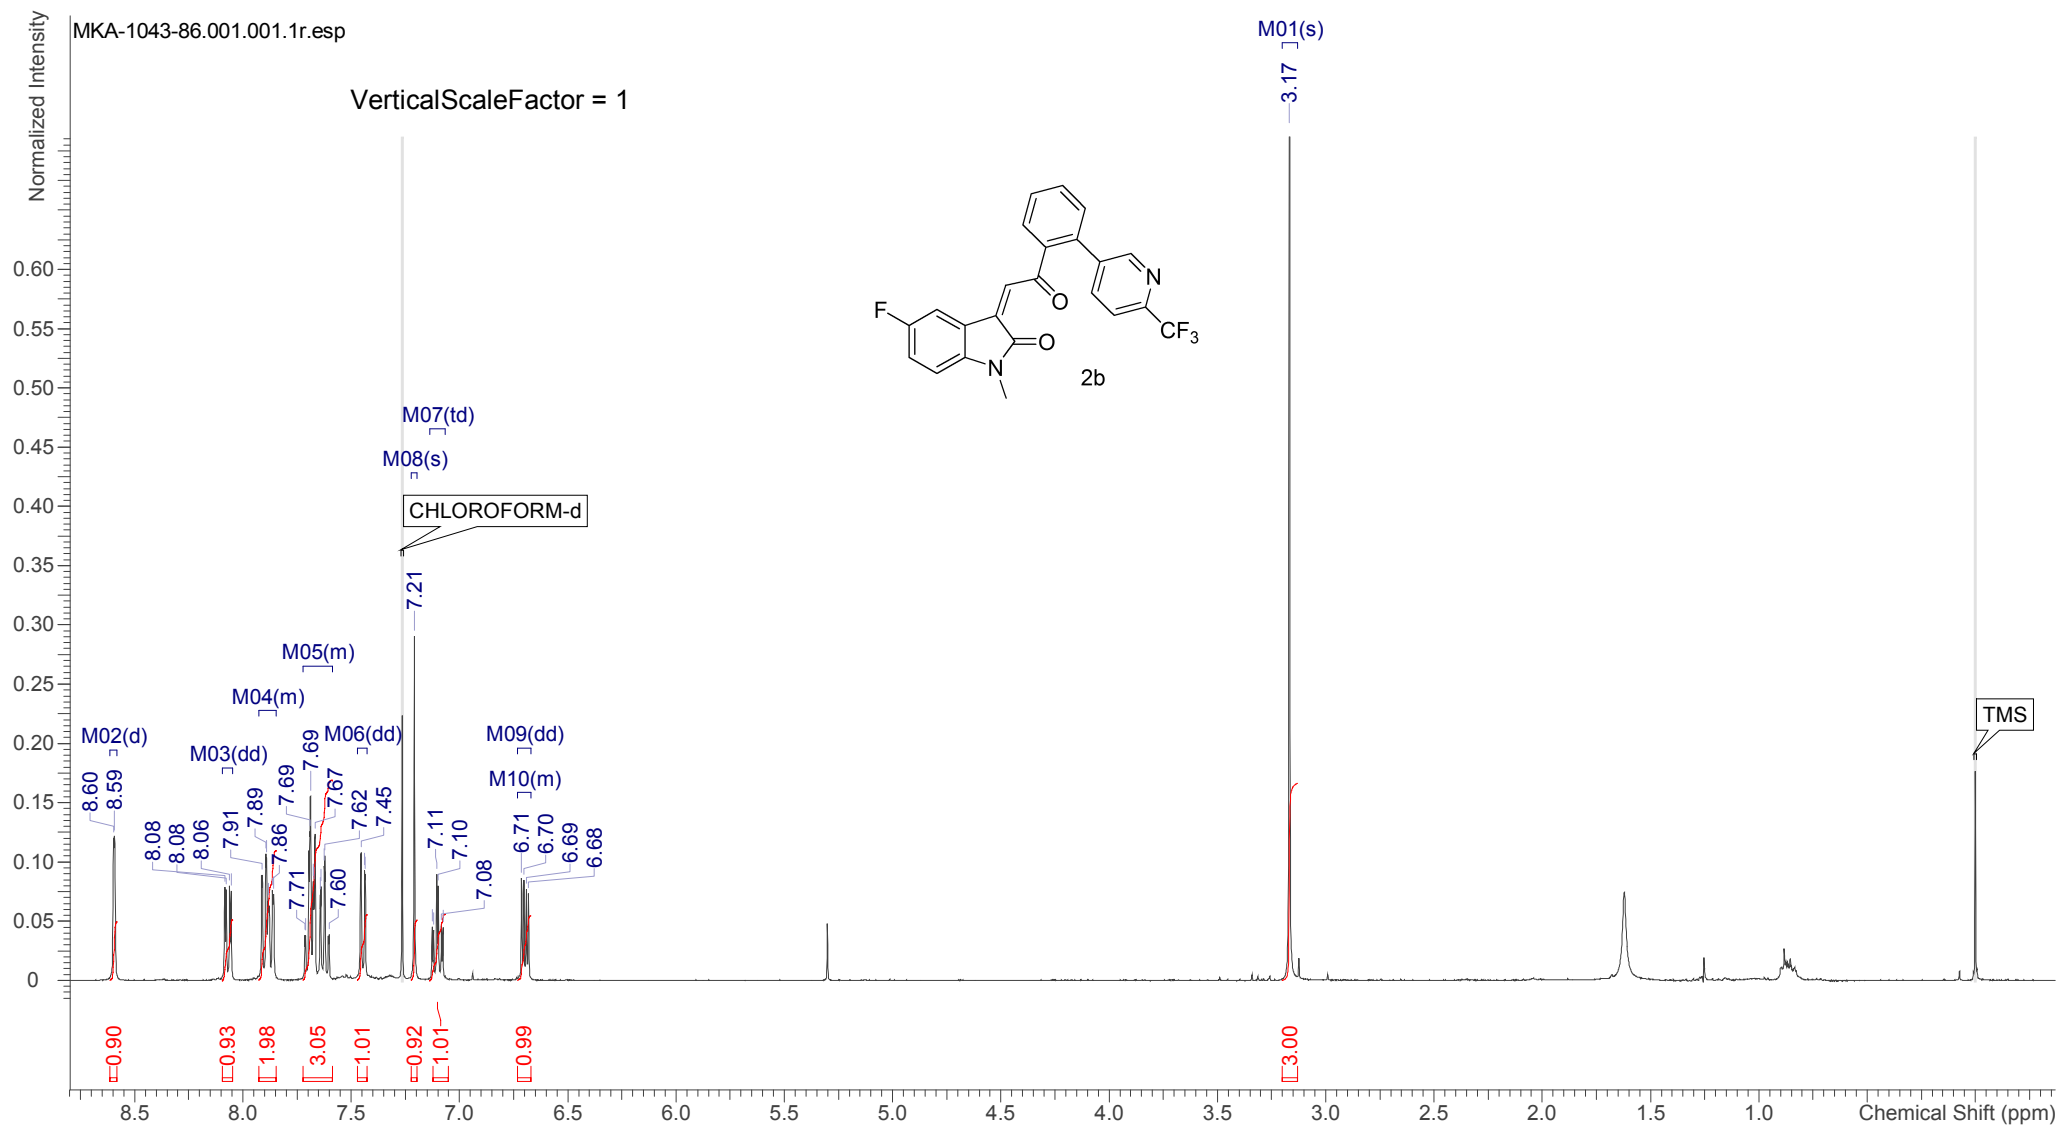

|                                                        |                                                                             |                                      |                                        |                               |  |
|--------------------------------------------------------|-----------------------------------------------------------------------------|--------------------------------------|----------------------------------------|-------------------------------|--|
| <b>OriginalDateForRelativeTime</b> 2014-05-02T23:40:56 |                                                                             | <b>Multiplets Integrals Sum</b> 0.00 |                                        | <b>Number of Nuclei</b> 0 C's |  |
| <b>Acquisition Time (sec)</b> 1.0912                   | <b>Comment</b> MKA-1043-86 C13CPD CDCl3 {F:\ecm\DATA\2014-04} bionmr 14     | <b>Date</b> 02 May 2014 23:40:56     |                                        |                               |  |
| <b>Date Stamp</b> 02 May 2014 23:40:56                 | <b>File Name</b> \\inbgrdsp01\elndata\MKA\07052014\MKA-1043-86\2\PDATA\1\1r |                                      |                                        |                               |  |
| <b>Frequency (MHz)</b> 125.77                          | <b>Nucleus</b> 13C                                                          | <b>Number of Transients</b> 10000    | <b>Origin</b> spect                    |                               |  |
| <b>Original Points Count</b> 32768                     | <b>Owner</b> administrator                                                  | <b>Points Count</b> 32768            | <b>Pulse Sequence</b> zgpg30           |                               |  |
| <b>Receiver Gain</b> 32768.00                          | <b>SW(cyclical) (Hz)</b> 30030.03                                           | <b>Solvent</b> CHLOROFORM-d          | <b>Spectrum Offset (Hz)</b> 12574.3232 |                               |  |
| <b>Spectrum Type</b> STANDARD                          | <b>Sweep Width (Hz)</b> 30029.11                                            | <b>Temperature (degree C)</b> 25.000 |                                        |                               |  |

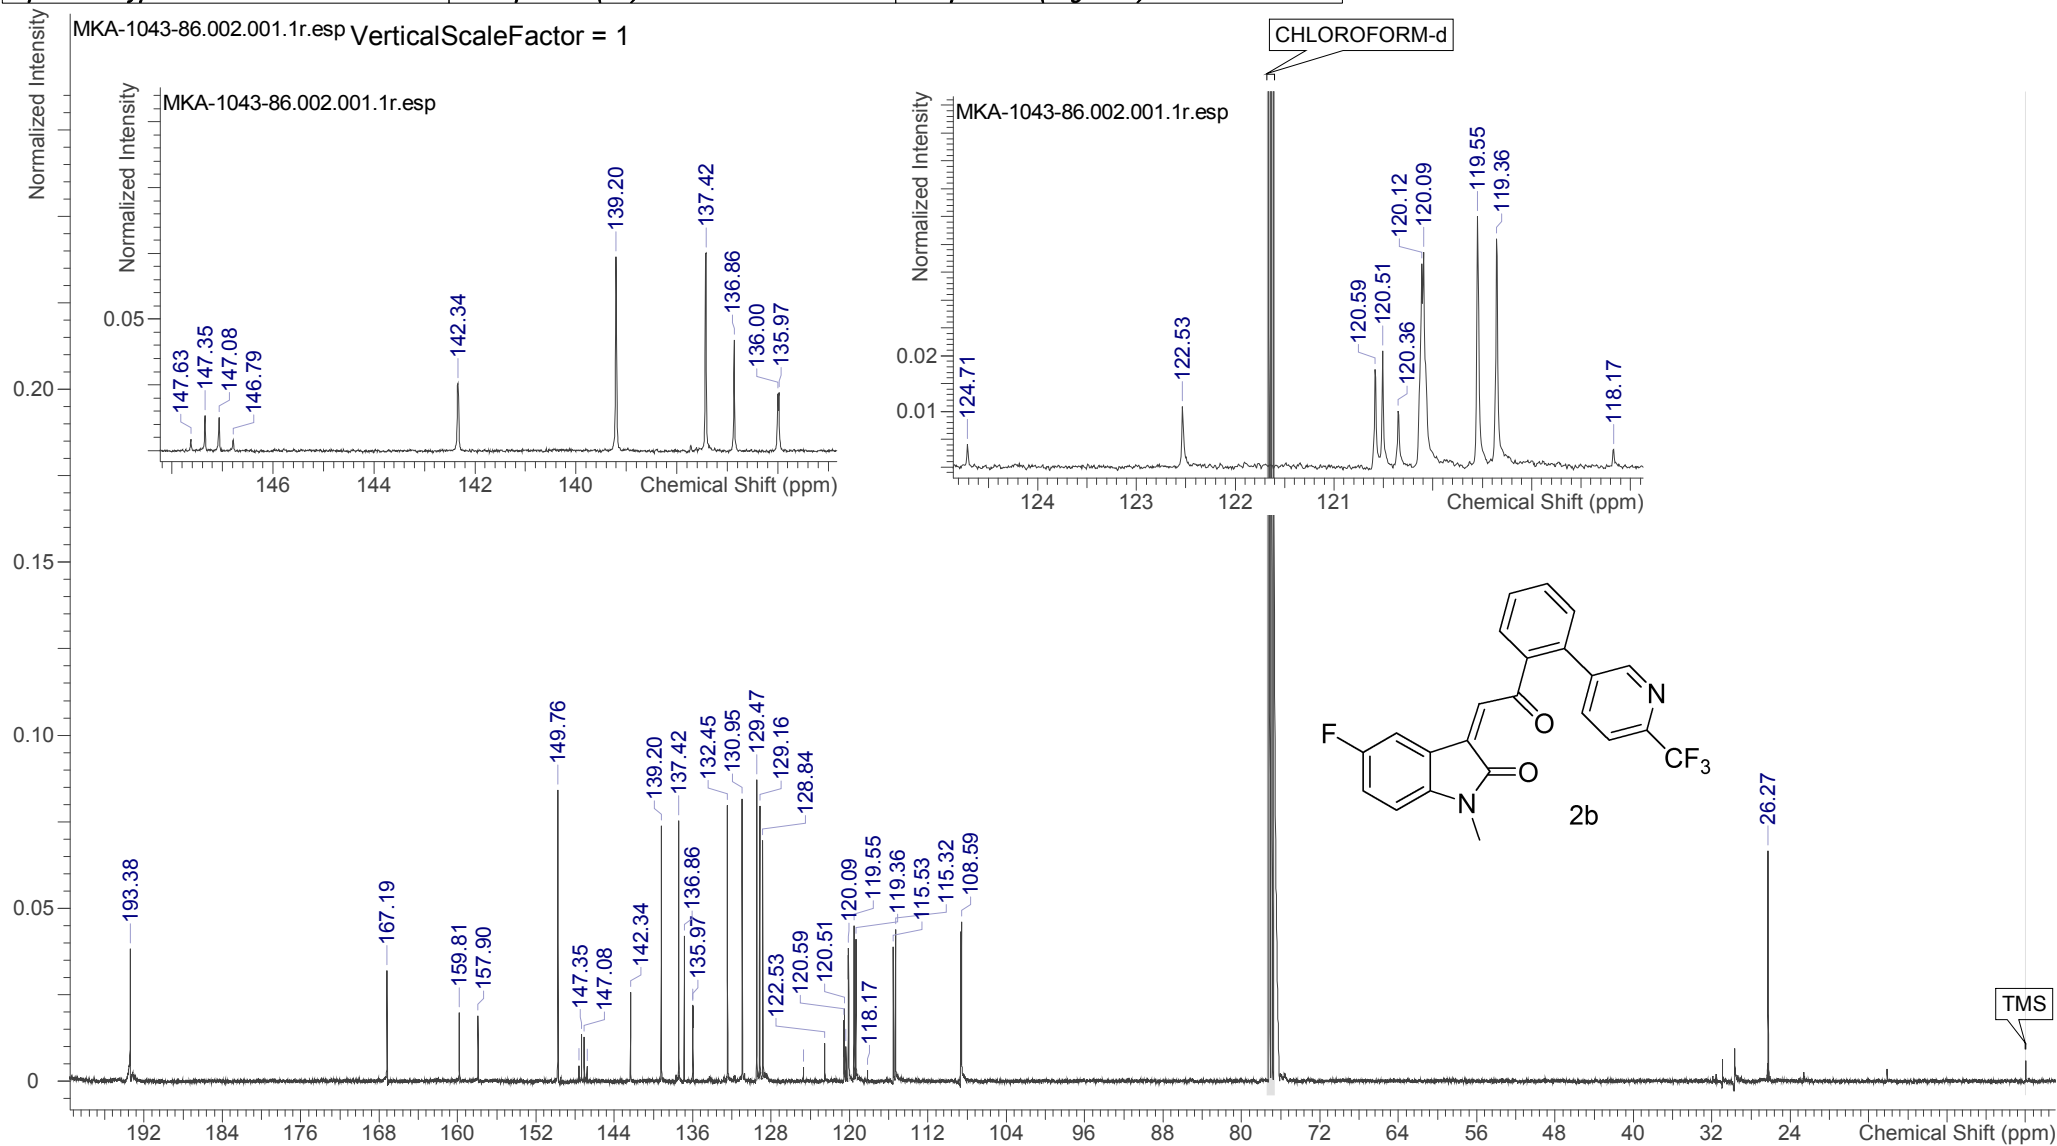

|                                                        |                                                                    |                                       |                                      |                                |  |
|--------------------------------------------------------|--------------------------------------------------------------------|---------------------------------------|--------------------------------------|--------------------------------|--|
| <b>OriginalDateForRelativeTime</b> 2014-04-16T18:12:24 |                                                                    | <b>Multiplets Integrals Sum</b> 15.46 |                                      | <b>Number of Nuclei</b> 15 H's |  |
| <b>Acquisition Time (sec)</b> 1.9923                   | <b>Comment</b> MKA-1043-84/CDCI3 PROTON CDCI3 {D:\RA} astra 1      | <b>Date</b> 16 Apr 2014 18:12:24      |                                      |                                |  |
| <b>Date Stamp</b> 16 Apr 2014 18:12:24                 | <b>File Name</b> \\inbgrdsp01\elndata\MKA\MKA-1043-84\1\PDATA\1\1r |                                       |                                      |                                |  |
| <b>Frequency (MHz)</b> 400.13                          | <b>Nucleus</b> 1H                                                  | <b>Number of Transients</b> 16        | <b>Origin</b> spect                  |                                |  |
| <b>Original Points Count</b> 16384                     | <b>Owner</b> nmrsu                                                 | <b>Points Count</b> 16384             | <b>Pulse Sequence</b> zg30           |                                |  |
| <b>Receiver Gain</b> 203.00                            | <b>SW(cyclical) (Hz)</b> 8223.68                                   | <b>Solvent</b> CHLOROFORM-d           |                                      |                                |  |
| <b>Spectrum Offset (Hz)</b> 2465.5046                  | <b>Spectrum Type</b> STANDARD                                      | <b>Sweep Width (Hz)</b> 8223.18       | <b>Temperature (degree C)</b> 27.000 |                                |  |

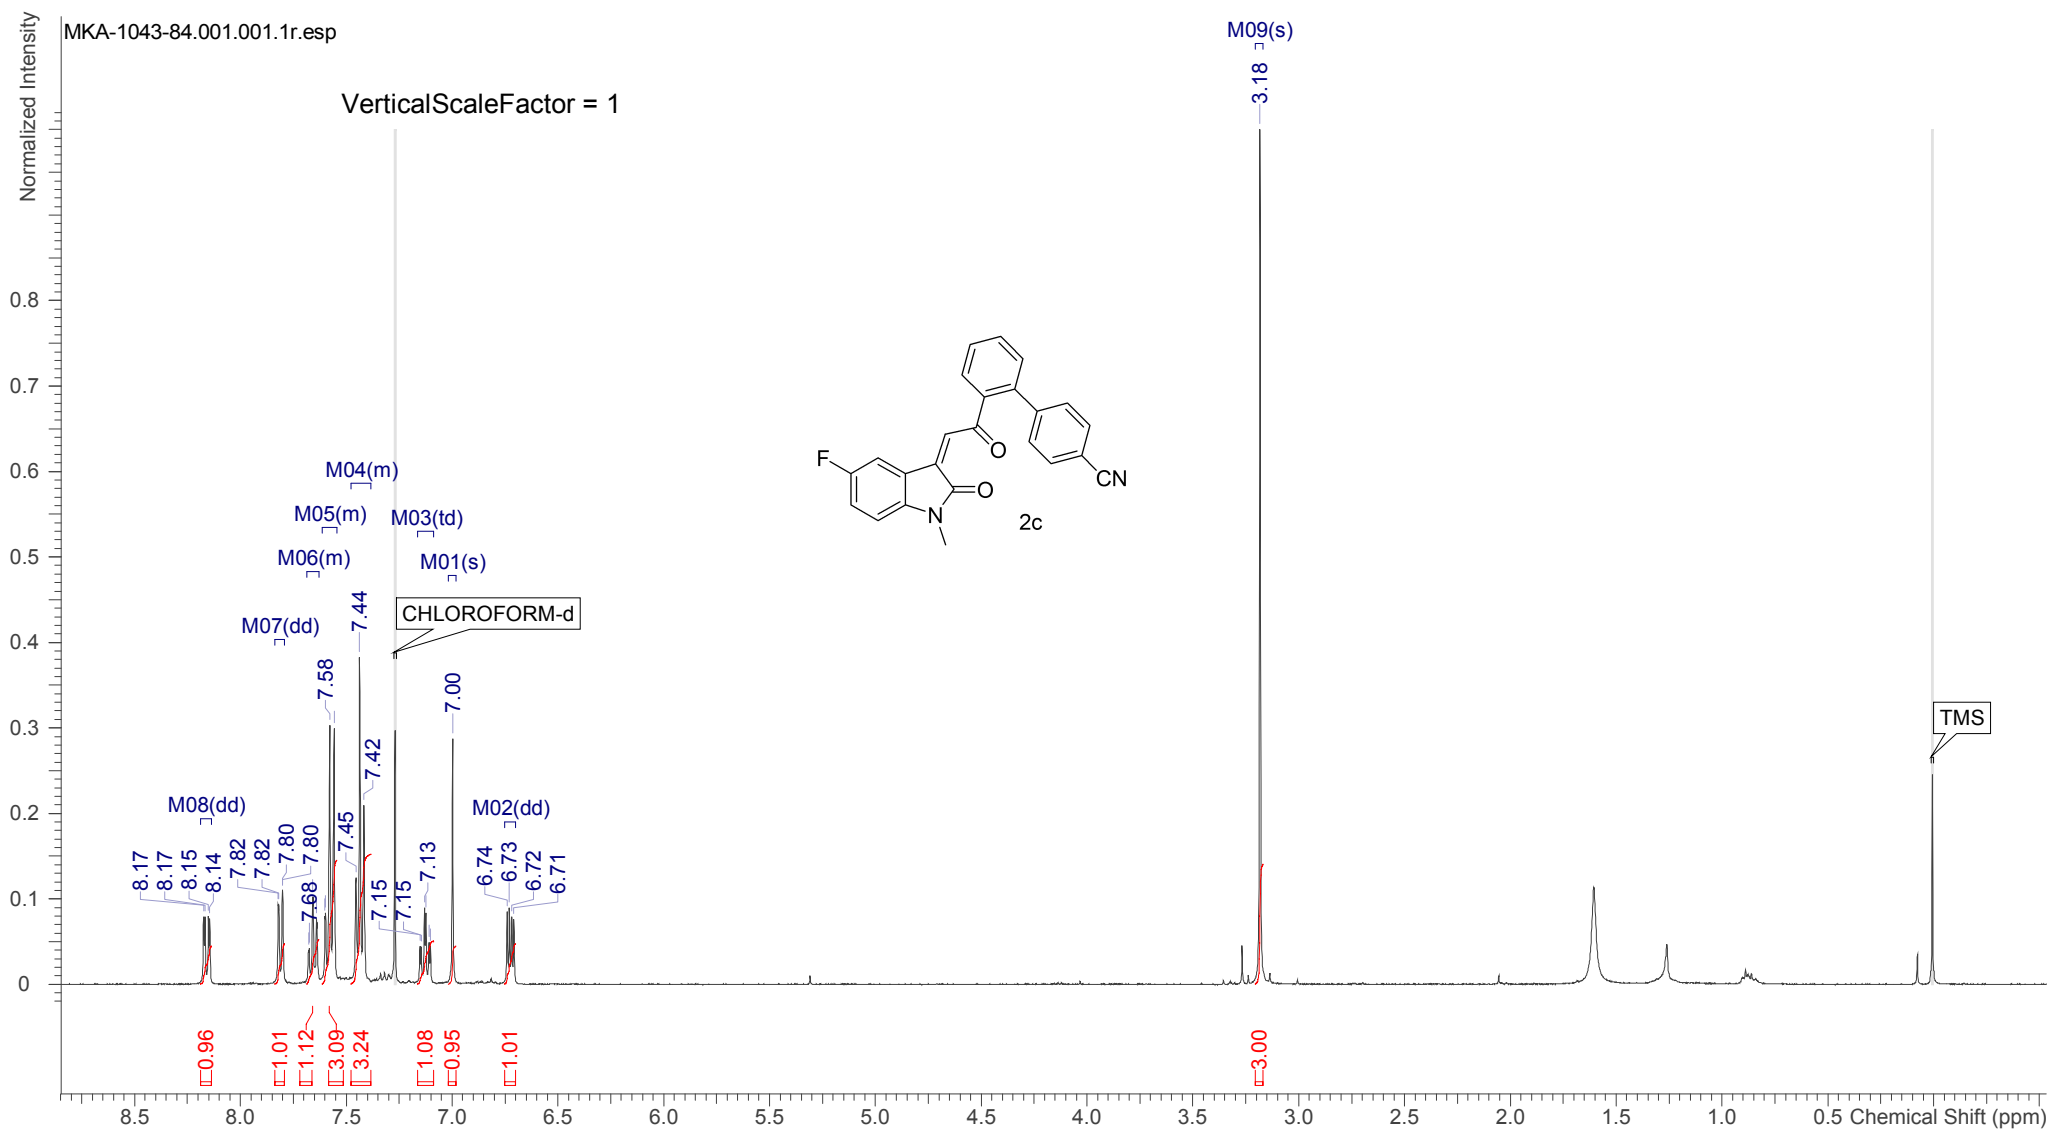

|                                                        |                                                                   |                                      |                                      |                                  |  |
|--------------------------------------------------------|-------------------------------------------------------------------|--------------------------------------|--------------------------------------|----------------------------------|--|
| <b>OriginalDateForRelativeTime</b> 2014-04-16T20:07:36 |                                                                   | <b>Multiplets Integrals Sum</b> 0.00 |                                      | <b>Number of Nuclei</b> 0 C's    |  |
| <b>Acquisition Time (sec)</b> 1.3631                   | <b>Comment</b> MKA-1043-84-13C/CDCI3 C13CPD CDCI3 {D:\RA} astra 1 |                                      |                                      | <b>Date</b> 16 Apr 2014 20:07:36 |  |
| <b>Date Stamp</b> 16 Apr 2014 20:07:36                 | <b>File Name</b> \\inbgrdsp01\ehdata\MKA\MKA-1043-84\2\PDATA\1\1r |                                      |                                      |                                  |  |
| <b>Frequency (MHz)</b> 100.62                          | <b>Nucleus</b> 13C                                                | <b>Number of Transients</b> 2000     | <b>Origin</b> spect                  |                                  |  |
| <b>Original Points Count</b> 32768                     | <b>Owner</b> nmrsu                                                | <b>Points Count</b> 32768            | <b>Pulse Sequence</b> zgpg30         |                                  |  |
| <b>Receiver Gain</b> 322.00                            | <b>SW(cyclical) (Hz)</b> 24038.46                                 | <b>Solvent</b> CHLOROFORM-d          |                                      |                                  |  |
| <b>Spectrum Offset (Hz)</b> 10061.6299                 | <b>Spectrum Type</b> STANDARD                                     | <b>Sweep Width (Hz)</b> 24037.73     | <b>Temperature (degree C)</b> 27.000 |                                  |  |

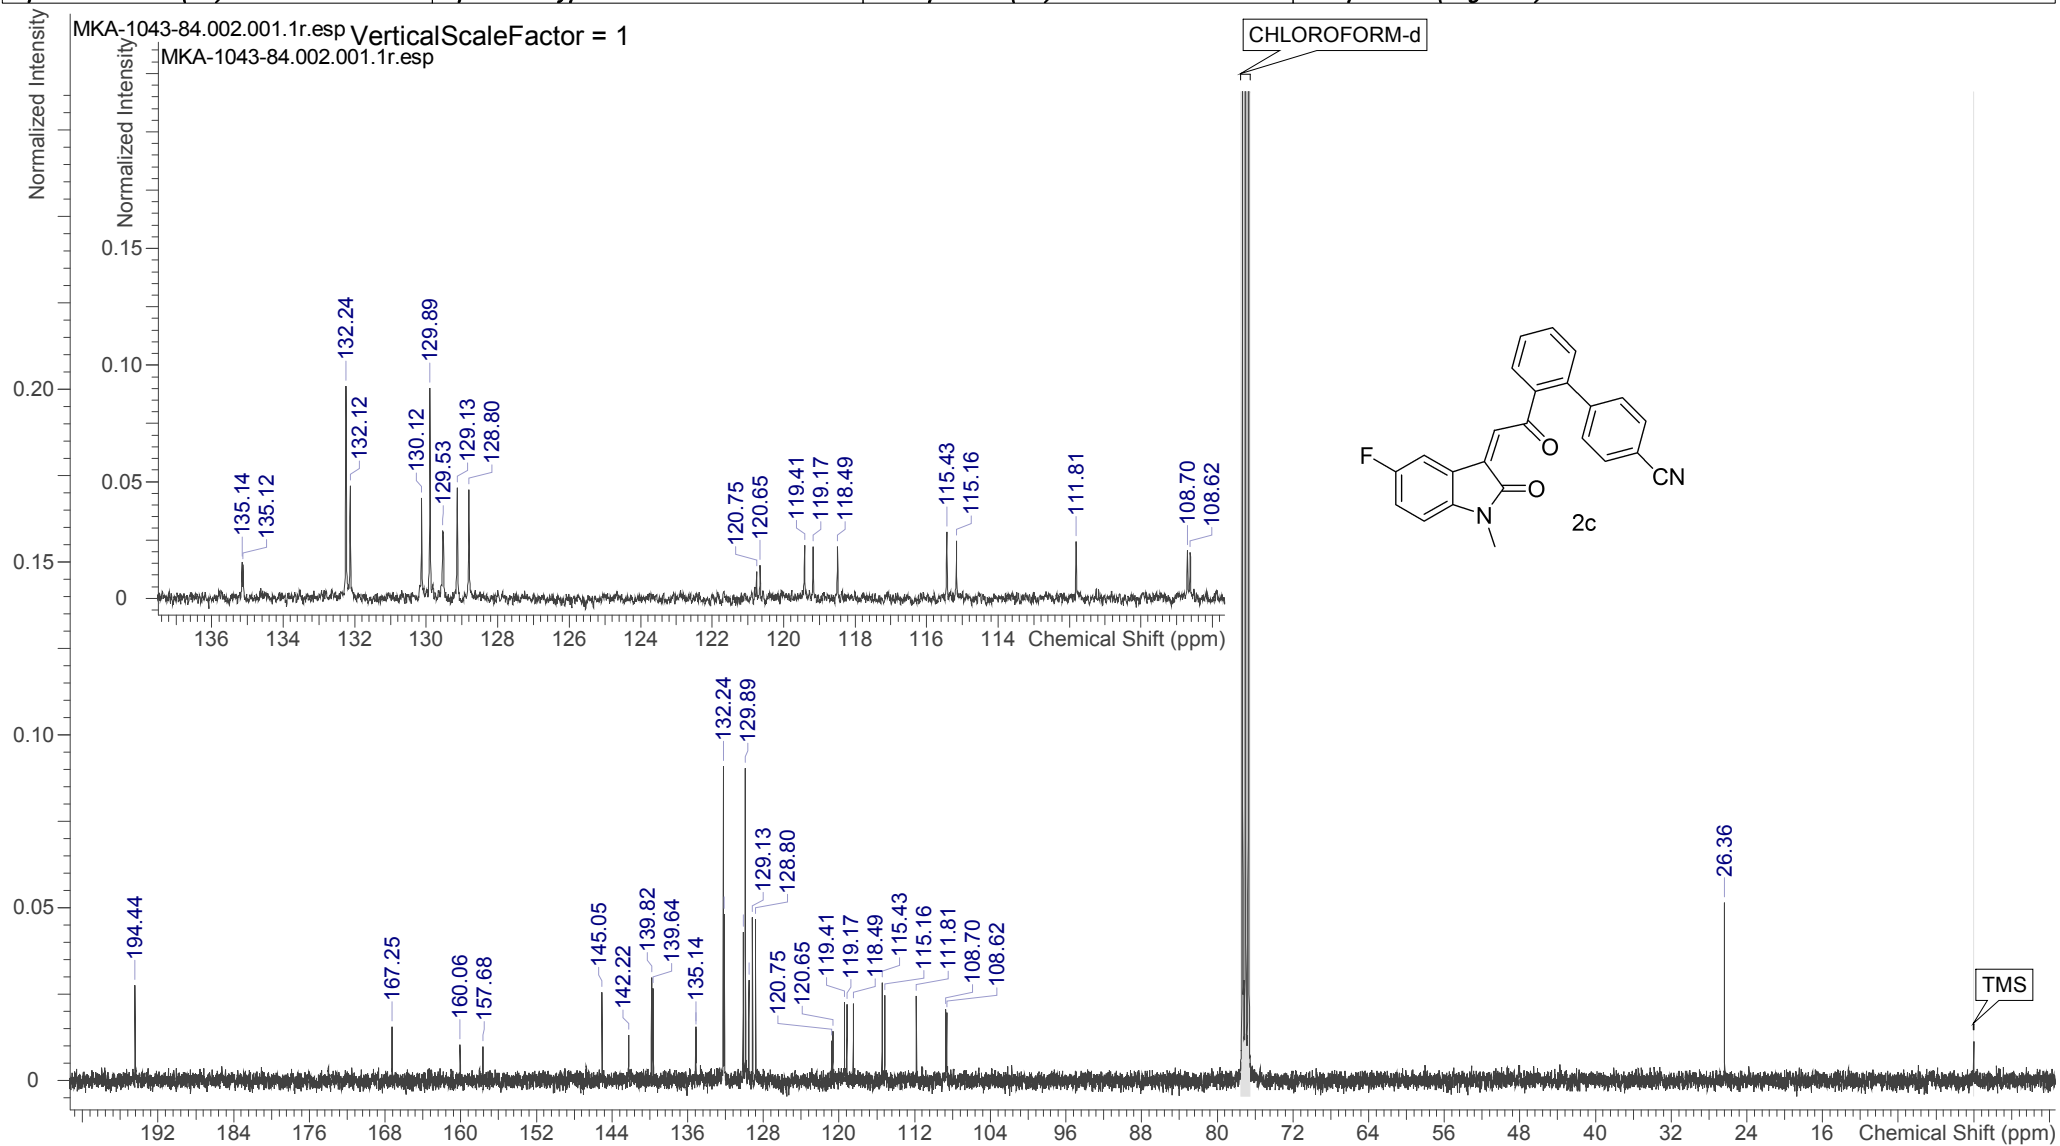

|                                    |                      |                                 |                                                   |                               |                      |
|------------------------------------|----------------------|---------------------------------|---------------------------------------------------|-------------------------------|----------------------|
| <b>OriginalDateForRelativeTime</b> | 2014-04-17T14:17:44  | <b>Multiplets Integrals Sum</b> | 15.02                                             | <b>Number of Nuclei</b>       | 14 H's               |
| <b>Acquisition Time (sec)</b>      | 1.9923               | <b>Comment</b>                  | MKA-1043-88 PROTON CDCl3 {D:IRA} SamTrack 4       | <b>Date</b>                   | 17 Apr 2014 14:17:44 |
| <b>Date Stamp</b>                  | 17 Apr 2014 14:17:44 | <b>File Name</b>                | \\inbgrdsp01\elndata\MKA\MKA-1043-88\1\PDATA\1\1r |                               |                      |
| <b>Frequency (MHz)</b>             | 400.13               | <b>Nucleus</b>                  | 1H                                                | <b>Number of Transients</b>   | 16                   |
| <b>Original Points Count</b>       | 16384                | <b>Owner</b>                    | nmrsu                                             | <b>Points Count</b>           | 16384                |
| <b>Receiver Gain</b>               | 228.00               | <b>SW(cyclical) (Hz)</b>        | 8223.68                                           | <b>Solvent</b>                | CHLOROFORM-d         |
| <b>Spectrum Offset (Hz)</b>        | 2465.5046            | <b>Spectrum Type</b>            | STANDARD                                          | <b>Sweep Width (Hz)</b>       | 8223.18              |
|                                    |                      |                                 |                                                   | <b>Temperature (degree C)</b> | 27.000               |

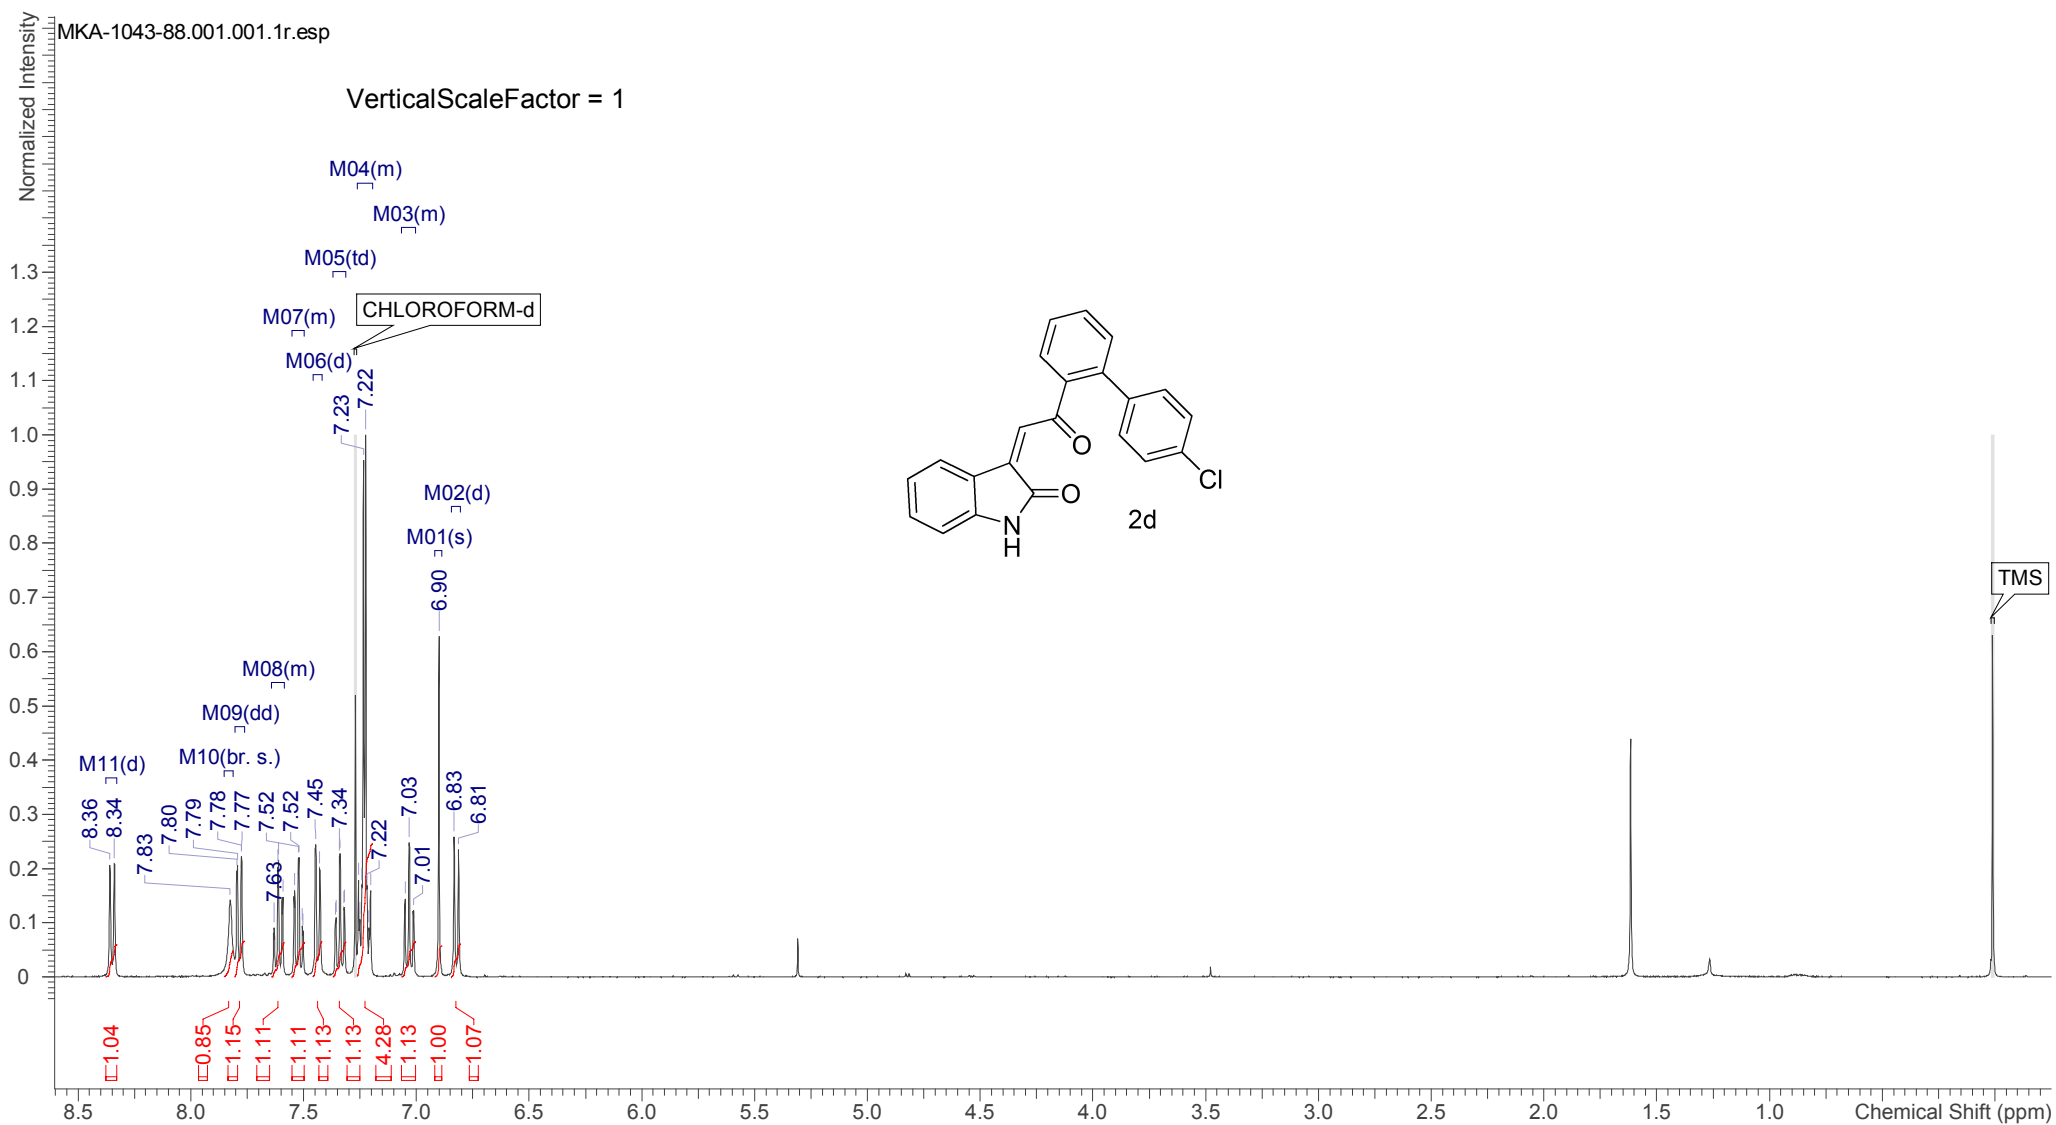

|                                    |                      |                                 |                                                   |                               |                      |
|------------------------------------|----------------------|---------------------------------|---------------------------------------------------|-------------------------------|----------------------|
| <b>OriginalDateForRelativeTime</b> | 2014-04-17T15:45:12  | <b>Multiplets Integrals Sum</b> | 0.00                                              | <b>Number of Nuclei</b>       | 0 C's                |
| <b>Acquisition Time (sec)</b>      | 1.3631               | <b>Comment</b>                  | MKA-1043-88 C13CPD CDCl3 {D:\RA} SamTrack 4       | <b>Date</b>                   | 17 Apr 2014 15:45:12 |
| <b>Date Stamp</b>                  | 17 Apr 2014 15:45:12 | <b>File Name</b>                | \\inbgrdsfp01\indata\MKA\MKA-1043-88\2\PDATA\1\1r |                               |                      |
| <b>Frequency (MHz)</b>             | 100.62               | <b>Nucleus</b>                  | 13C                                               | <b>Number of Transients</b>   | 1500                 |
| <b>Original Points Count</b>       | 32768                | <b>Owner</b>                    | nmsu                                              | <b>Points Count</b>           | 32768                |
| <b>Receiver Gain</b>               | 406.00               | <b>SW(cyclical) (Hz)</b>        | 24038.46                                          | <b>Solvent</b>                | CHLOROFORM-d         |
| <b>Spectrum Offset (Hz)</b>        | 10061.6299           | <b>Spectrum Type</b>            | STANDARD                                          | <b>Sweep Width (Hz)</b>       | 24037.73             |
|                                    |                      |                                 |                                                   | <b>Temperature (degree C)</b> | 27.000               |

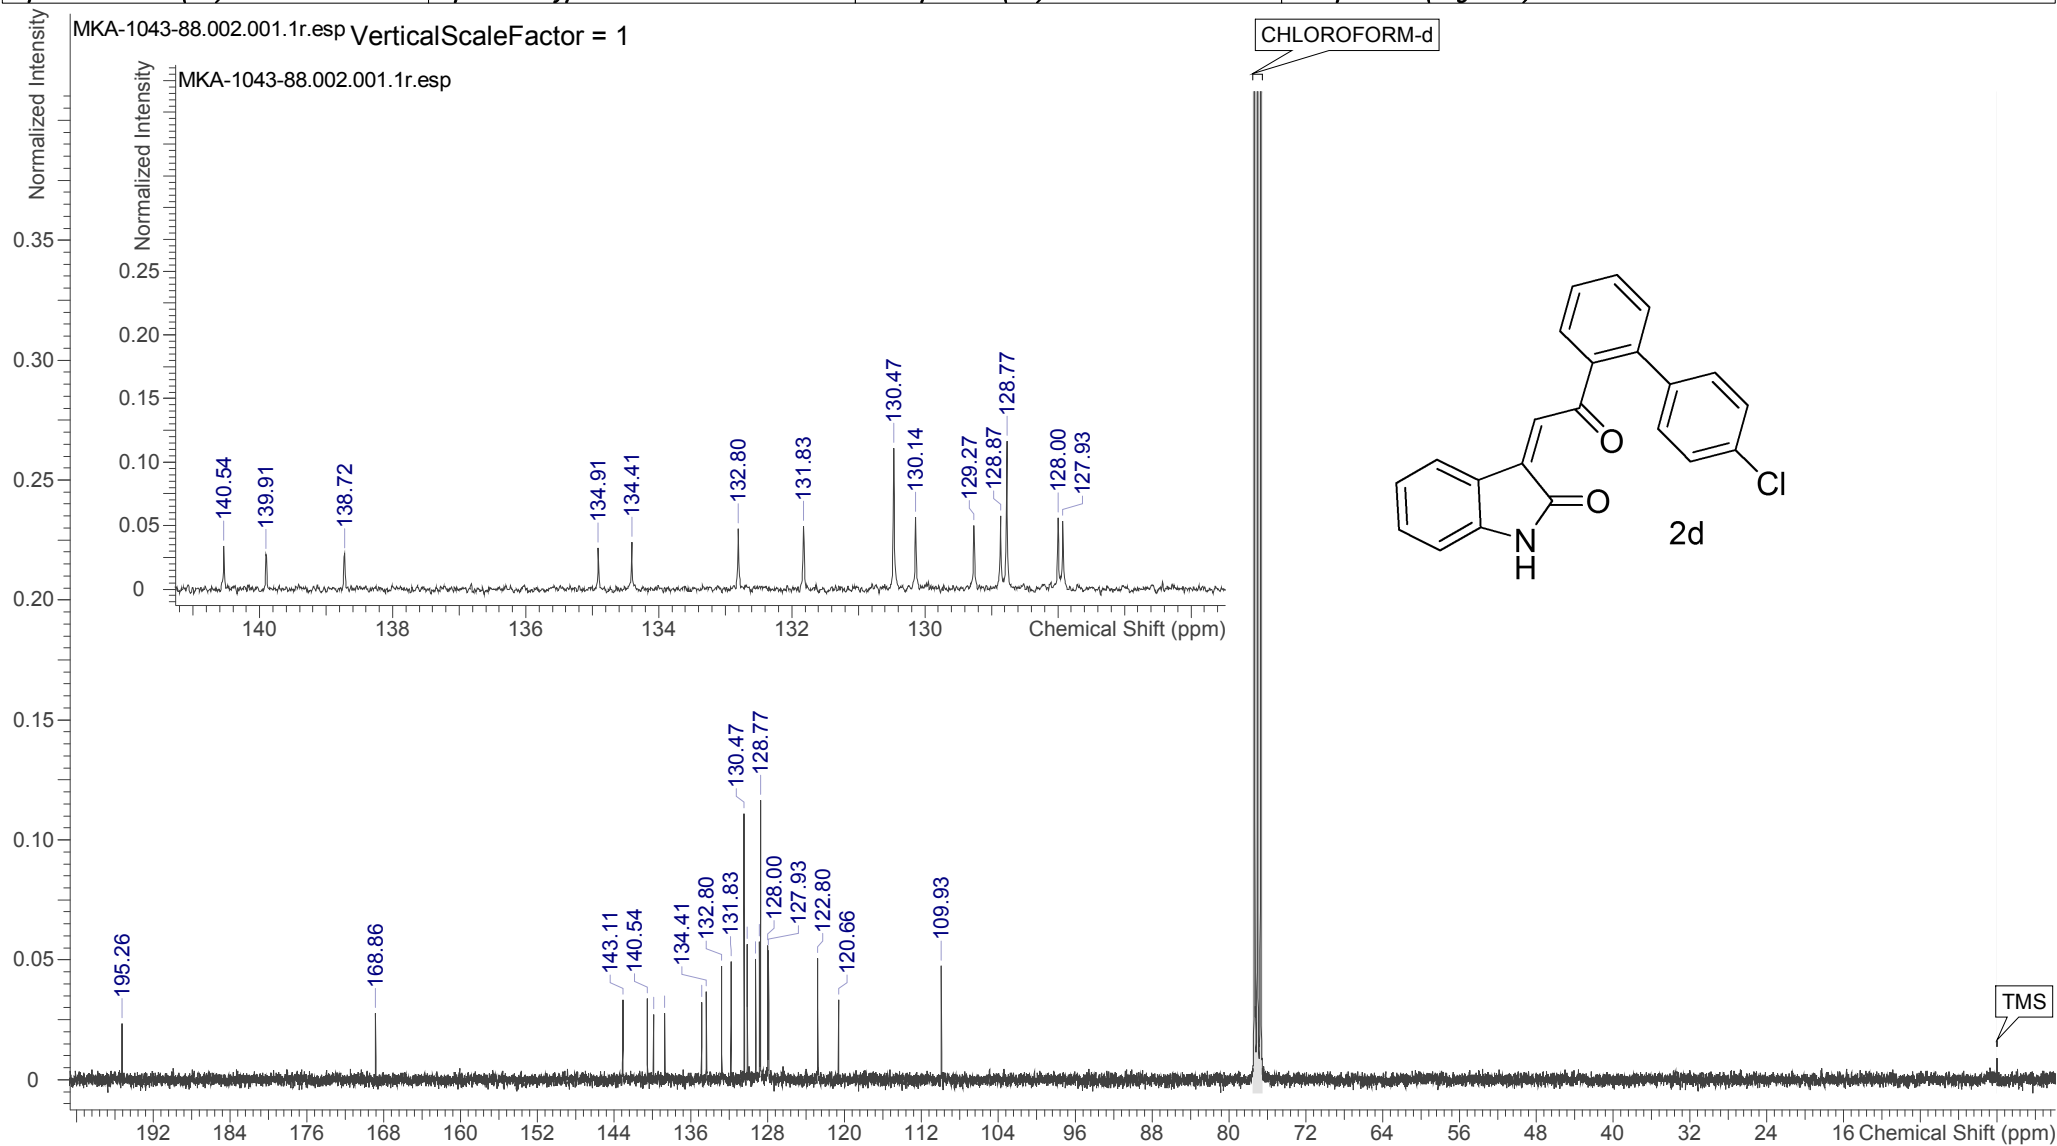

|                                                                              |                                                                        |                                       |                                    |                                |  |
|------------------------------------------------------------------------------|------------------------------------------------------------------------|---------------------------------------|------------------------------------|--------------------------------|--|
| <i>OriginalDateForRelativeTime</i> 2014-05-04T02:23:04                       |                                                                        | <i>Multiplets Integrals Sum</i> 13.26 |                                    | <i>Number of Nuclei</i> 13 H's |  |
| <i>Acquisition Time (sec)</i> 3.1719                                         | <i>Comment</i> MKA-1043-91 PROTON DMSO {F:\ecm\DATA\2014-04} bionmr 18 |                                       |                                    |                                |  |
| <i>Date</i> 04 May 2014 02:23:04                                             | <i>Date Stamp</i> 04 May 2014 02:23:04                                 |                                       |                                    |                                |  |
| <i>File Name</i> \\inbgrdsfp01\elndata\MKA\07052014\MKA-1043-91\1\PDATA\1\1r |                                                                        |                                       | <i>Frequency (MHz)</i> 500.13      |                                |  |
| <i>Nucleus</i> 1H                                                            | <i>Number of Transients</i> 16                                         | <i>Origin</i> spect                   | <i>Original Points Count</i> 32768 |                                |  |
| <i>Owner</i> administrator                                                   | <i>Points Count</i> 32768                                              | <i>Pulse Sequence</i> zg30            | <i>Receiver Gain</i> 4.00          |                                |  |
| <i>SW(cyclical) (Hz)</i> 10330.58                                            | <i>Solvent</i> DMSO-d6                                                 | <i>Spectrum Offset (Hz)</i> 3092.7820 | <i>Spectrum Type</i> STANDARD      |                                |  |
| <i>Sweep Width (Hz)</i> 10330.26                                             | <i>Temperature (degree C)</i> 25.000                                   |                                       |                                    |                                |  |

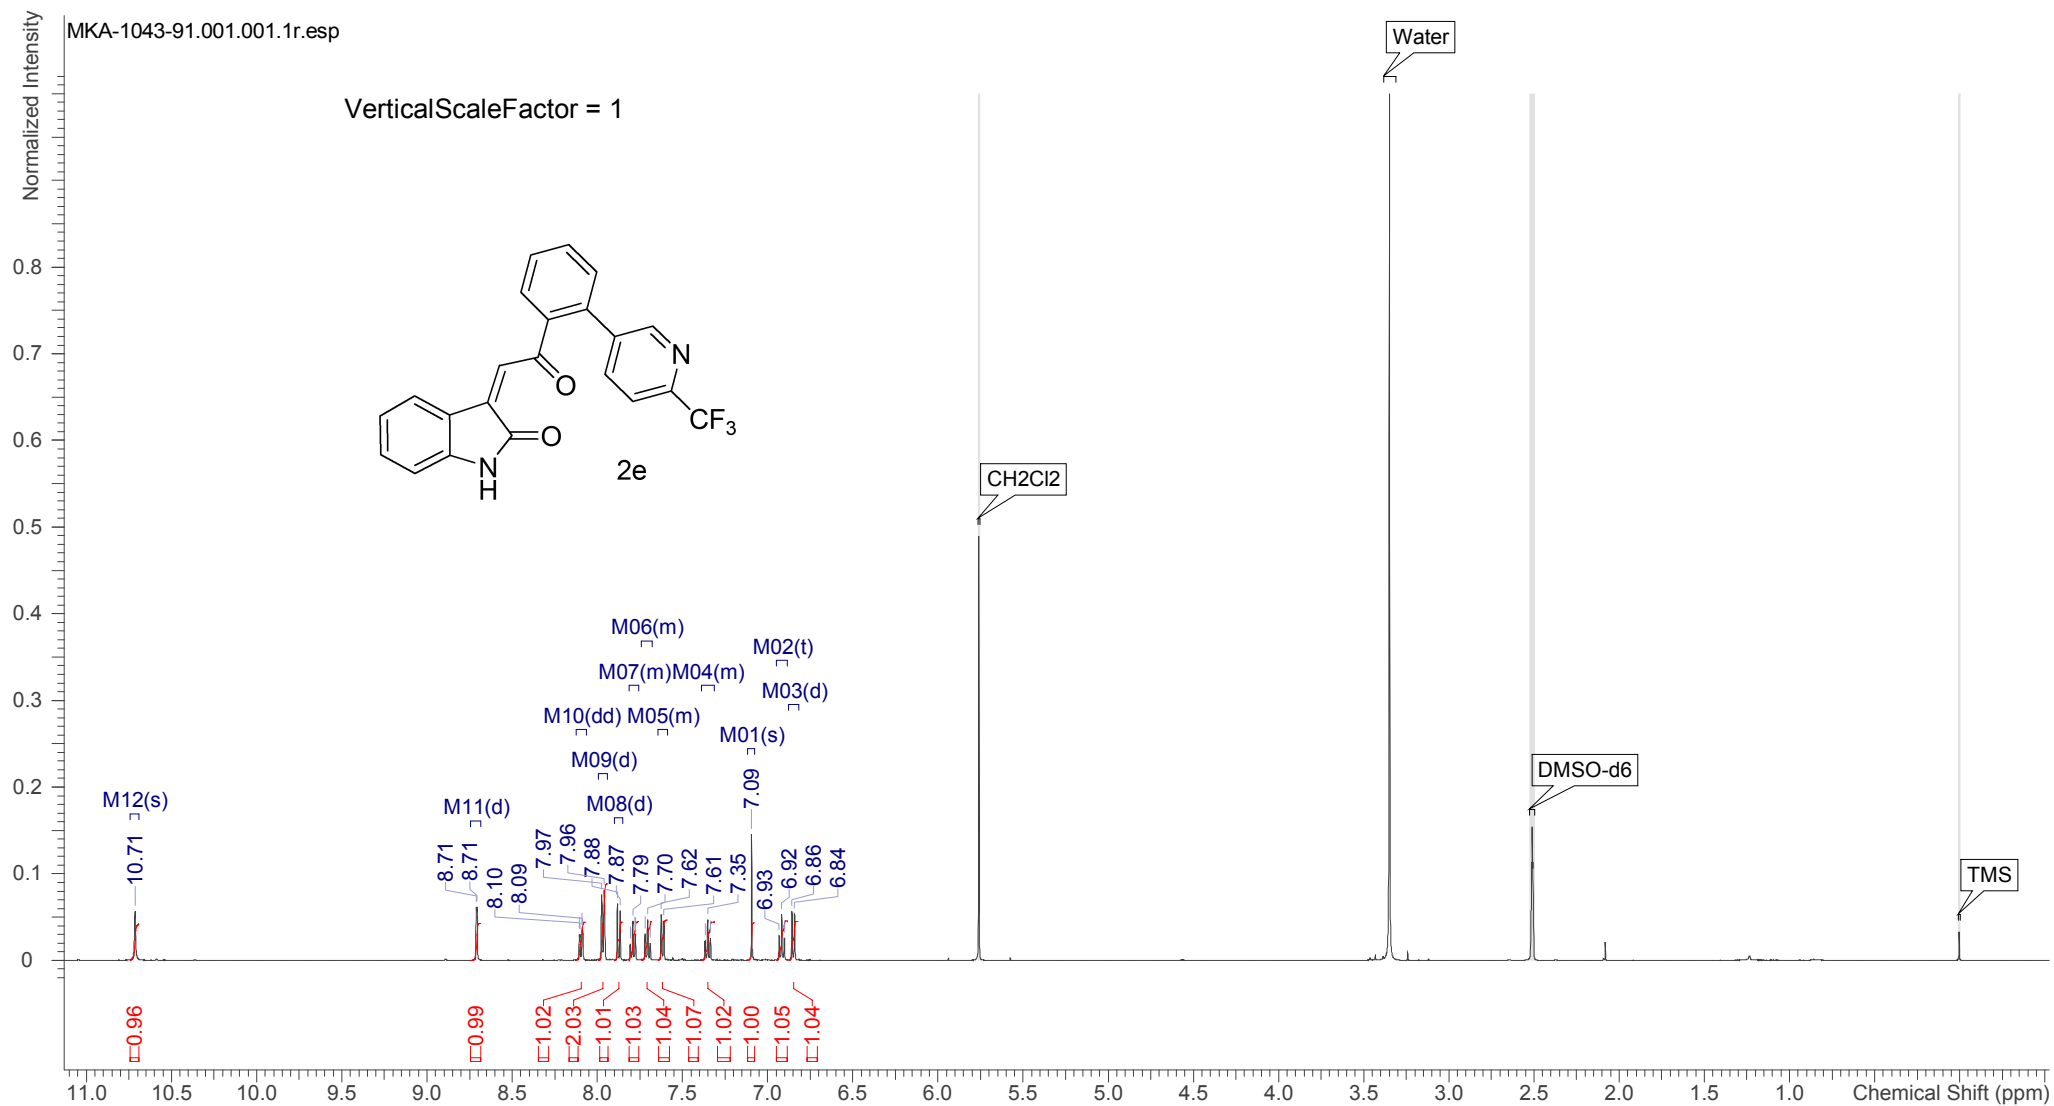

|                                                        |                                                                              |                                      |                                        |                               |  |
|--------------------------------------------------------|------------------------------------------------------------------------------|--------------------------------------|----------------------------------------|-------------------------------|--|
| <b>OriginalDateForRelativeTime</b> 2014-05-04T11:10:00 |                                                                              | <b>Multiplets Integrals Sum</b> 0.00 |                                        | <b>Number of Nuclei</b> 0 C's |  |
| <b>Acquisition Time (sec)</b> 1.0912                   | <b>Comment</b> MKA-1043-91 C13CPD DMSO {F:\ecm\DATA\2014-04} bionmr 18       | <b>Date</b> 04 May 2014 11:10:00     |                                        |                               |  |
| <b>Date Stamp</b> 04 May 2014 11:10:00                 | <b>File Name</b> \\inbgrdsfp01\elndata\MKA\07052014\MKA-1043-91\2\PDATA\1\1r |                                      |                                        |                               |  |
| <b>Frequency (MHz)</b> 125.77                          | <b>Nucleus</b> 13C                                                           | <b>Number of Transients</b> 10000    | <b>Origin</b> spect                    |                               |  |
| <b>Original Points Count</b> 32768                     | <b>Owner</b> administrator                                                   | <b>Points Count</b> 32768            | <b>Pulse Sequence</b> zgpg30           |                               |  |
| <b>Receiver Gain</b> 32768.00                          | <b>SW(cyclical) (Hz)</b> 30030.03                                            | <b>Solvent</b> DMSO-d6               | <b>Spectrum Offset (Hz)</b> 12518.3926 |                               |  |
| <b>Spectrum Type</b> STANDARD                          | <b>Sweep Width (Hz)</b> 30029.11                                             | <b>Temperature (degree C)</b> 25.000 |                                        |                               |  |

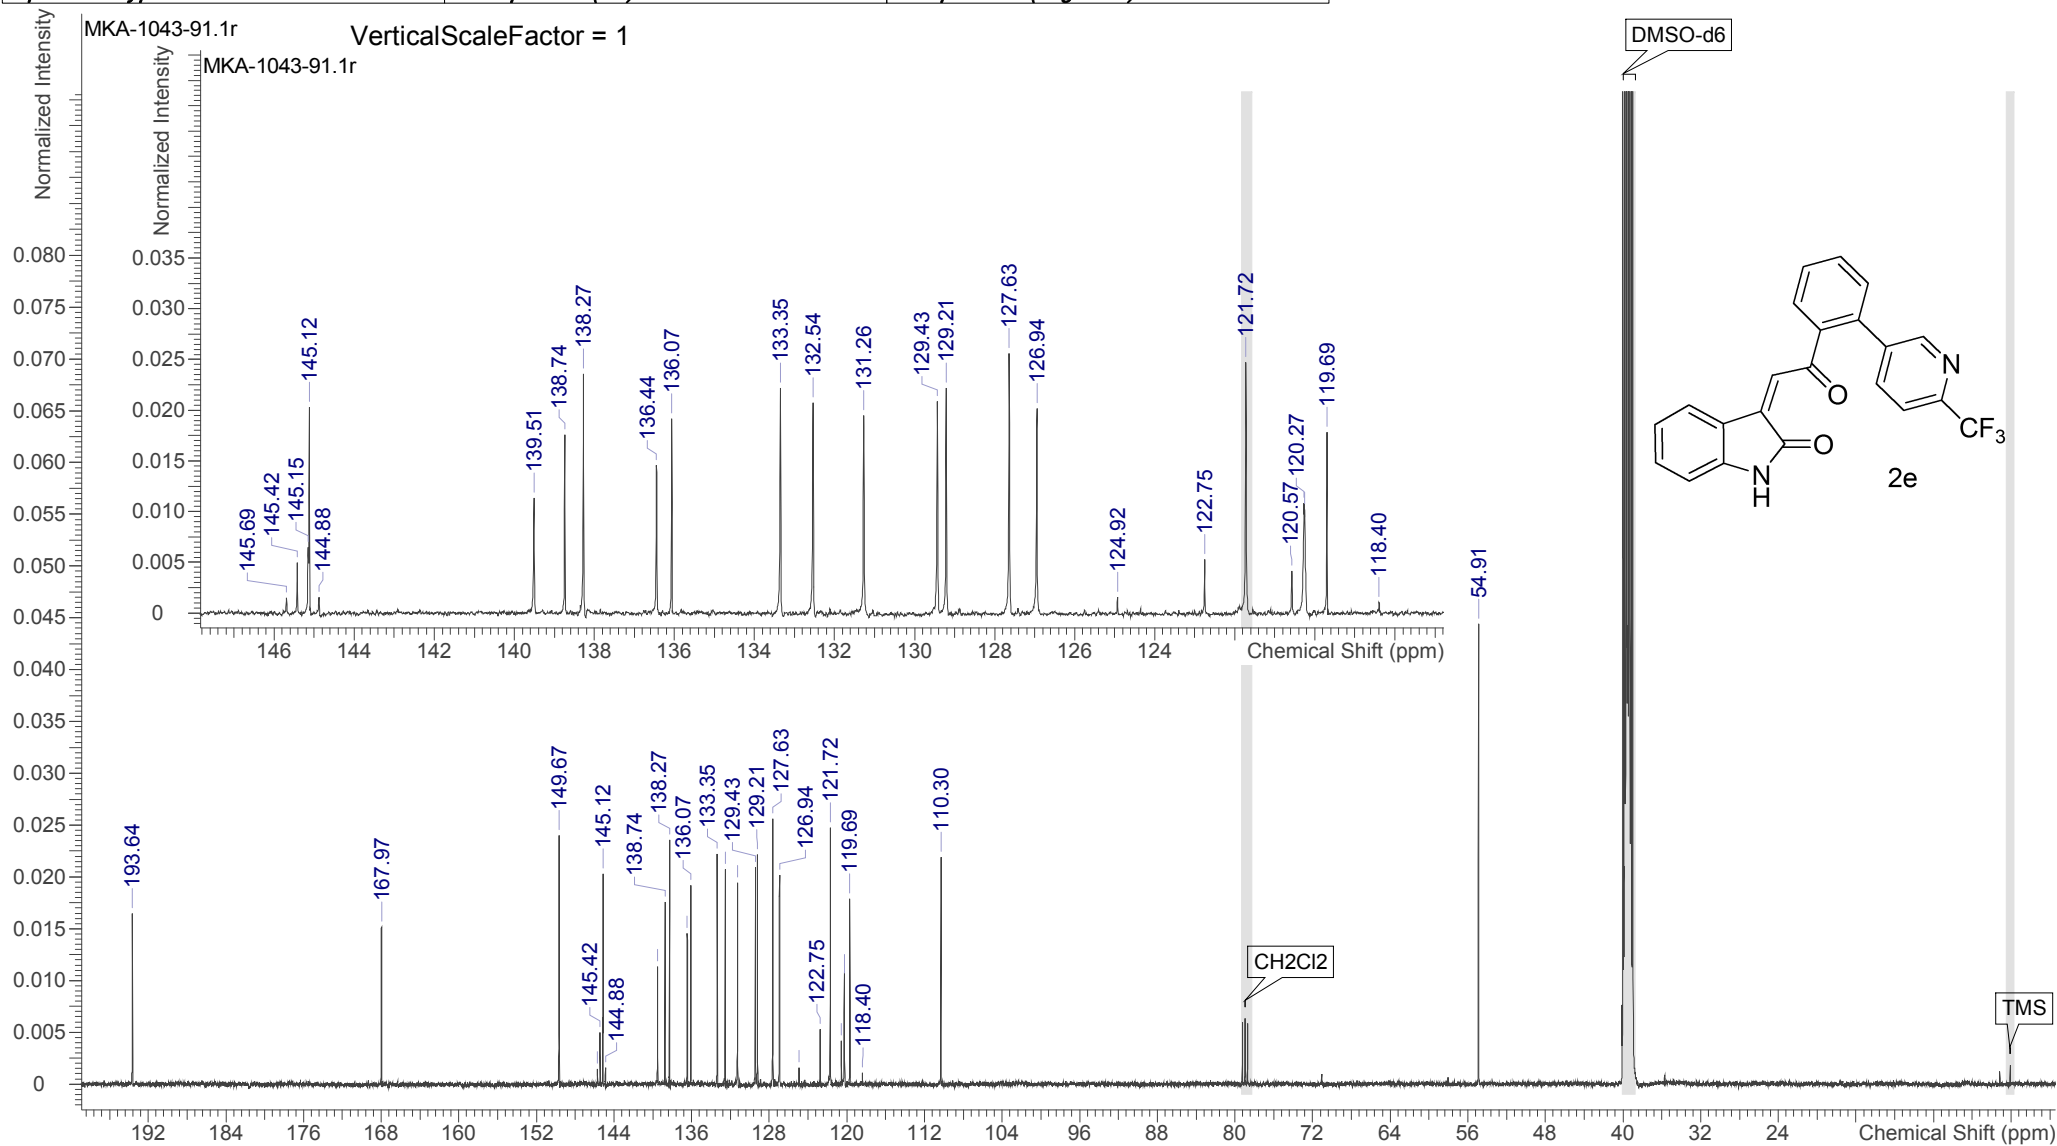



|                                                        |                                                                   |                                       |                                      |                                  |  |
|--------------------------------------------------------|-------------------------------------------------------------------|---------------------------------------|--------------------------------------|----------------------------------|--|
| <i>OriginalDateForRelativeTime</i> 2014-04-18T06:34:48 |                                                                   | <i>Multiplets Integrals Sum</i> 16.38 |                                      | <i>Number of Nuclei</i> 16 H's   |  |
| <i>Acquisition Time (sec)</i> 1.9923                   | <i>Comment</i> MKA-1043-89 PROTON CDCl3 {D:1RA} SamTrack 42       |                                       |                                      | <i>Date</i> 18 Apr 2014 06:34:48 |  |
| <i>Date Stamp</i> 18 Apr 2014 06:34:48                 | <i>File Name</i> \\inbgrdsp01\lndata\MKA\MKA-1043-89\1\PDATA\1\1r |                                       |                                      |                                  |  |
| <i>Frequency (MHz)</i> 400.13                          | <i>Nucleus</i> 1H                                                 | <i>Number of Transients</i> 16        | <i>Origin</i> spect                  |                                  |  |
| <i>Original Points Count</i> 16384                     | <i>Owner</i> nmrsu                                                | <i>Points Count</i> 16384             | <i>Pulse Sequence</i> zg30           |                                  |  |
| <i>Receiver Gain</i> 144.00                            | <i>SW(cyclical) (Hz)</i> 8223.68                                  | <i>Solvent</i> CHLOROFORM-d           |                                      |                                  |  |
| <i>Spectrum Offset (Hz)</i> 2465.5046                  | <i>Spectrum Type</i> STANDARD                                     | <i>Sweep Width (Hz)</i> 8223.18       | <i>Temperature (degree C)</i> 27.000 |                                  |  |

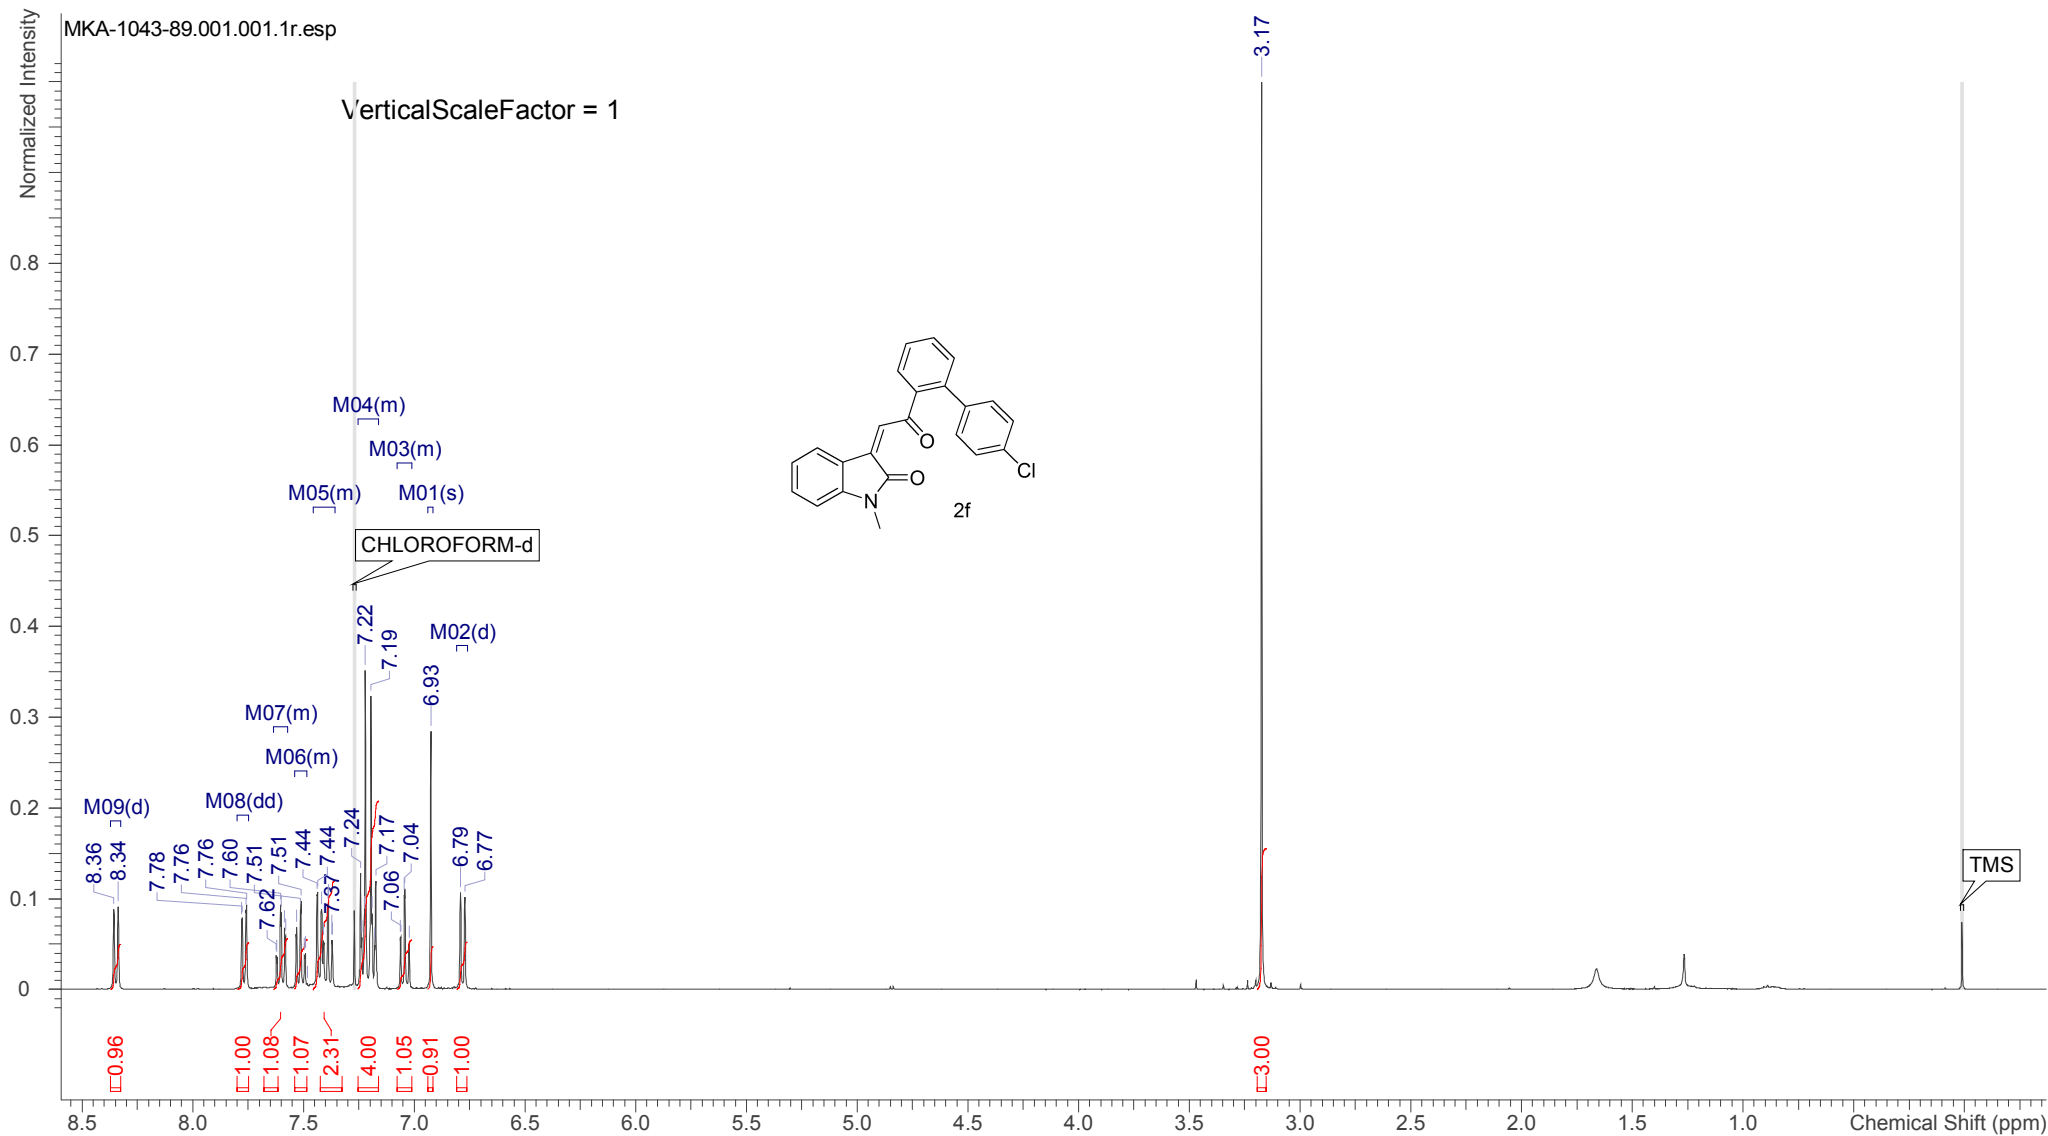

|                                                        |                                                                |                                      |                                      |                                  |  |
|--------------------------------------------------------|----------------------------------------------------------------|--------------------------------------|--------------------------------------|----------------------------------|--|
| <b>OriginalDateForRelativeTime</b> 2014-04-18T09:27:36 |                                                                | <b>Multiplets Integrals Sum</b> 0.00 |                                      | <b>Number of Nuclei</b> 0 C's    |  |
| <b>Acquisition Time (sec)</b> 1.3631                   | <b>Comment</b> MKA-1043-89 C13CPD CDCl3 {D:\RA} SamTrack 42    |                                      |                                      | <b>Date</b> 18 Apr 2014 09:27:36 |  |
| <b>Date Stamp</b> 18 Apr 2014 09:27:36                 | <b>File Name</b> \\inbgrdsfp01\indata\MKA-1043-89\2\PDATA\1\1r |                                      |                                      |                                  |  |
| <b>Frequency (MHz)</b> 100.62                          | <b>Nucleus</b> 13C                                             | <b>Number of Transients</b> 3000     | <b>Origin</b> spect                  |                                  |  |
| <b>Original Points Count</b> 32768                     | <b>Owner</b> nmrsu                                             | <b>Points Count</b> 32768            | <b>Pulse Sequence</b> zgpg30         |                                  |  |
| <b>Receiver Gain</b> 362.00                            | <b>SW(cyclical) (Hz)</b> 24038.46                              | <b>Solvent</b> CHLOROFORM-d          |                                      |                                  |  |
| <b>Spectrum Offset (Hz)</b> 10060.1631                 | <b>Spectrum Type</b> STANDARD                                  | <b>Sweep Width (Hz)</b> 24037.73     | <b>Temperature (degree C)</b> 27.000 |                                  |  |

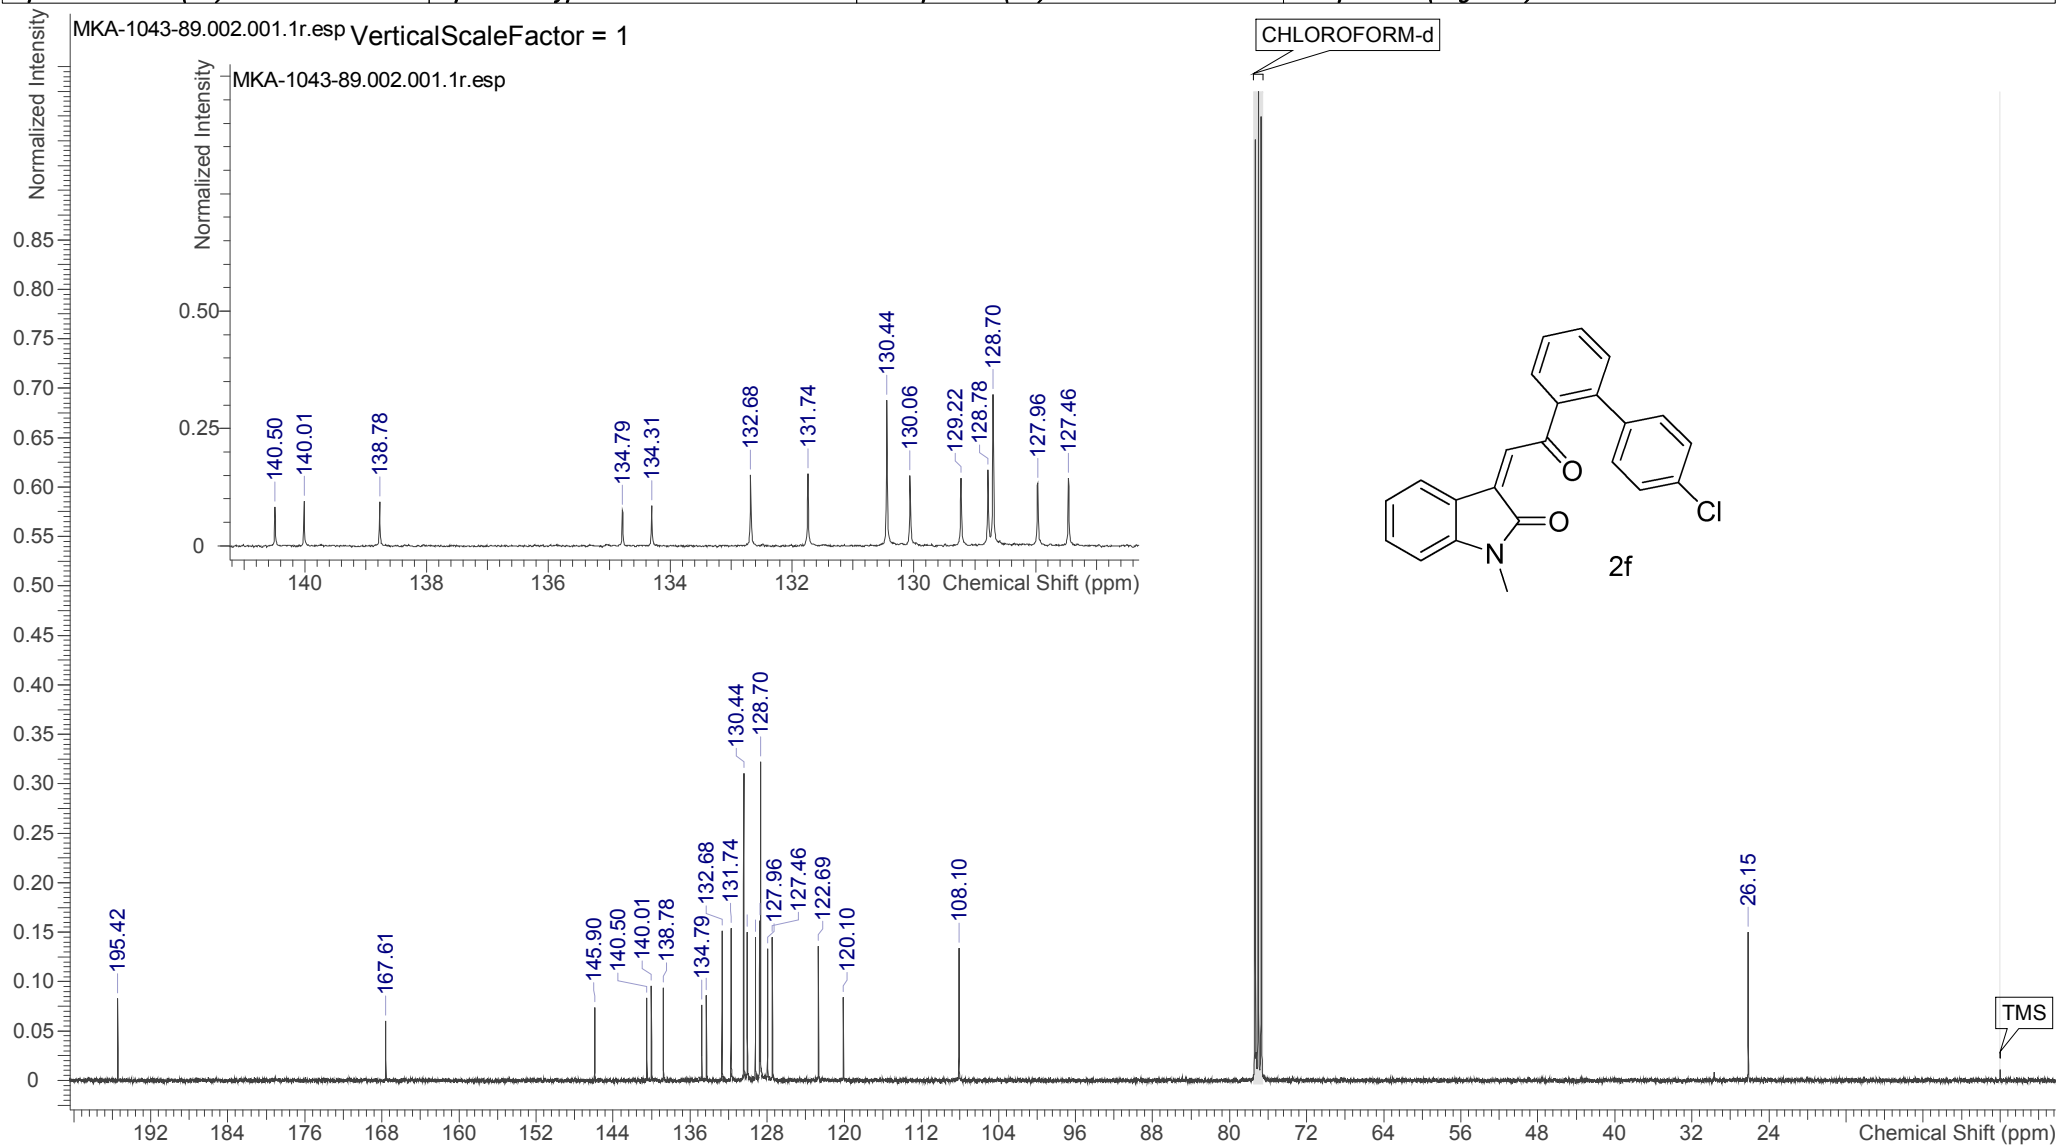

|                                                                           |                                                                      |                                       |                                    |                                |  |
|---------------------------------------------------------------------------|----------------------------------------------------------------------|---------------------------------------|------------------------------------|--------------------------------|--|
| <i>OriginalDateForRelativeTime</i> 2014-05-18T09:38:16                    |                                                                      | <i>Multiplets Integrals Sum</i> 15.37 |                                    | <i>Number of Nuclei</i> 15 H's |  |
| <i>Acquisition Time (sec)</i> 1.9923                                      | <i>Comment</i> MKA-1043-100-P1/CDCL3 PROTON CDCI3 {D:\RA} SamTrack 7 |                                       |                                    |                                |  |
| <i>Date</i> 18 May 2014 09:38:16                                          | <i>Date Stamp</i> 18 May 2014 09:38:16                               |                                       |                                    |                                |  |
| <i>File Name</i> \\inbgrdsp01\eldata\MKA\NEW\MKA-1043-100-P1\1\PDATA\1\1r | <i>Frequency (MHz)</i> 400.13                                        |                                       |                                    |                                |  |
| <i>Nucleus</i> 1H                                                         | <i>Number of Transients</i> 16                                       | <i>Origin</i> spect                   | <i>Original Points Count</i> 16384 |                                |  |
| <i>Owner</i> nmrsu                                                        | <i>Points Count</i> 16384                                            | <i>Pulse Sequence</i> zg30            | <i>Receiver Gain</i> 203.00        |                                |  |
| <i>SW(cyclical) (Hz)</i> 8223.68                                          | <i>Solvent</i> CHLOROFORM-d                                          | <i>Spectrum Offset (Hz)</i> 2465.5046 |                                    |                                |  |
| <i>Spectrum Type</i> STANDARD                                             | <i>Sweep Width (Hz)</i> 8223.18                                      | <i>Temperature (degree C)</i> 27.000  |                                    |                                |  |

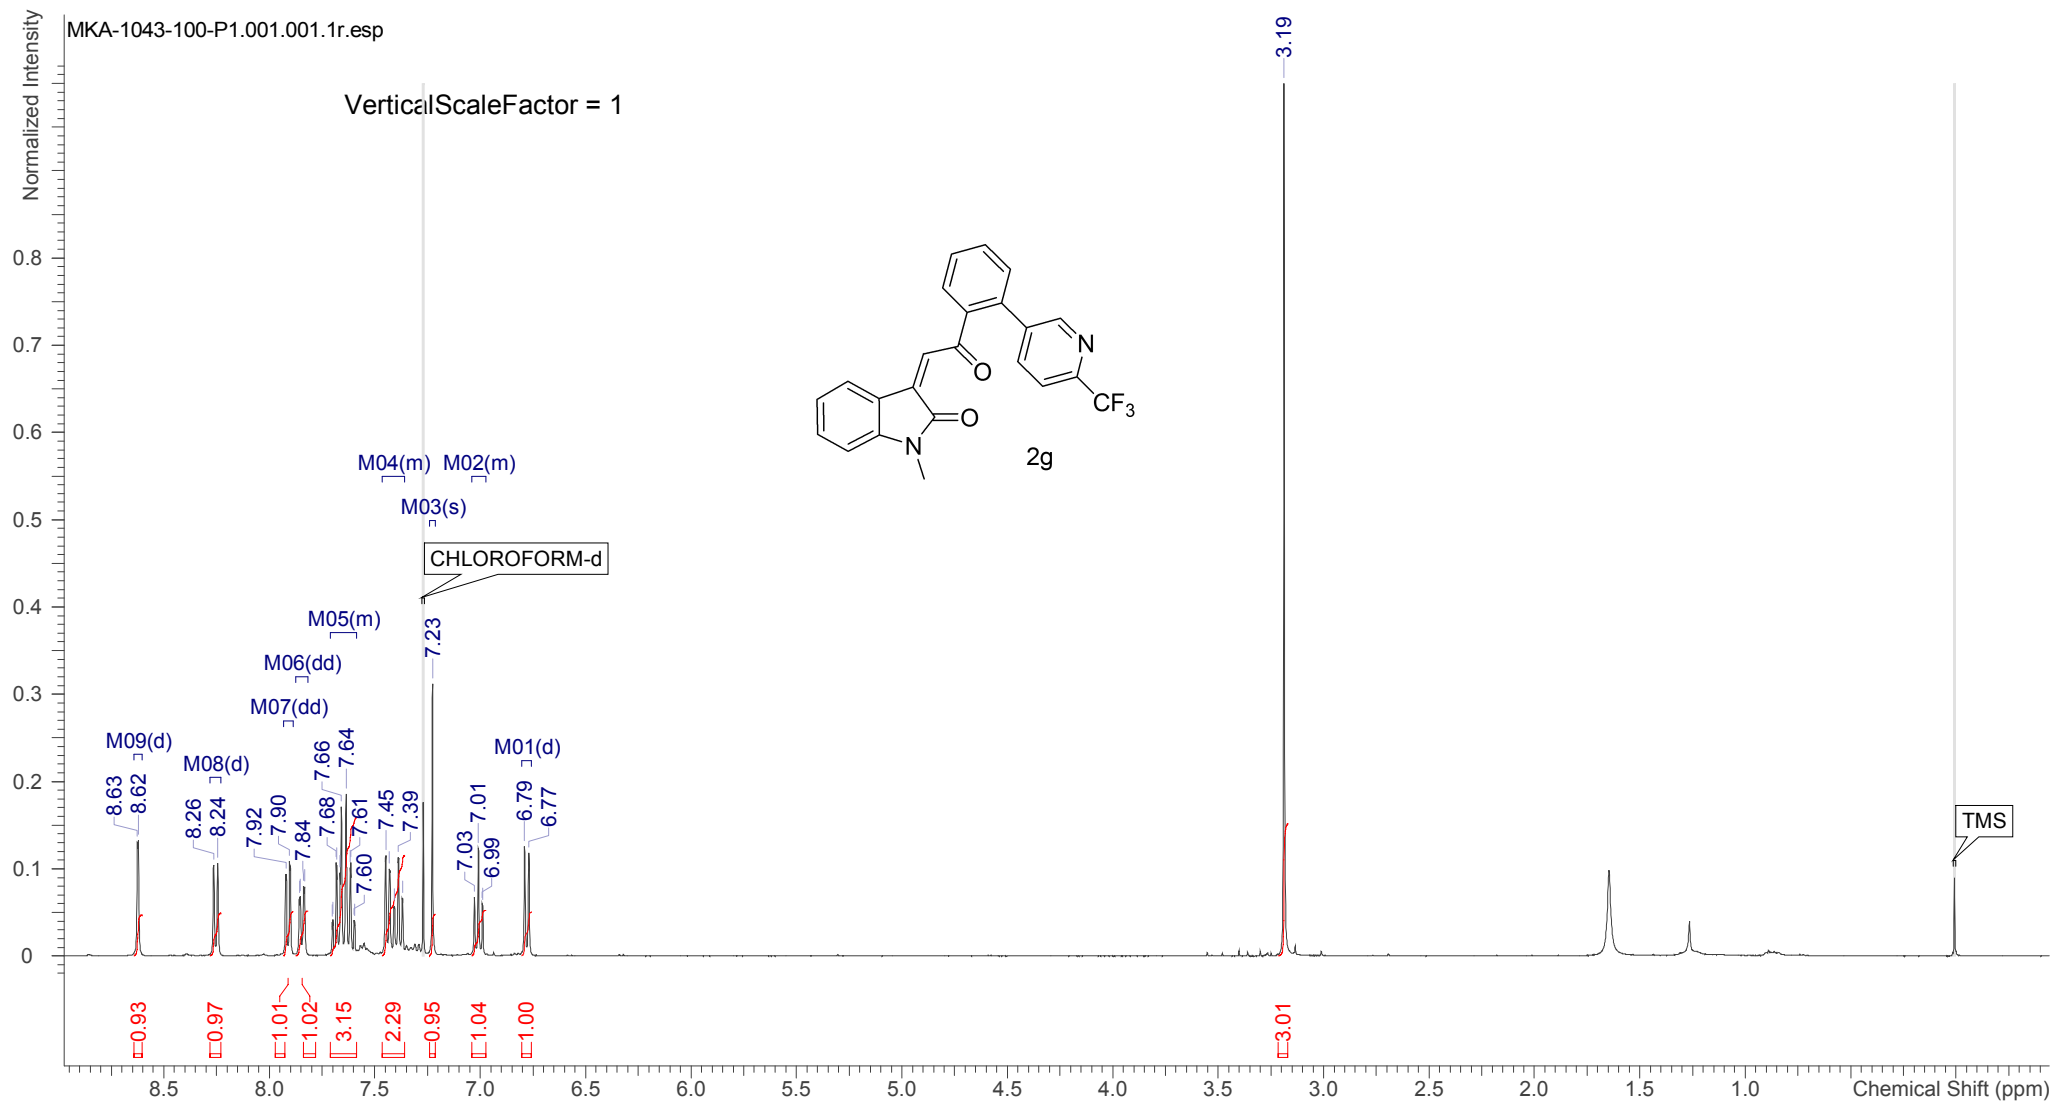

|                                                        |                                                                            |                                      |                                      |                               |  |
|--------------------------------------------------------|----------------------------------------------------------------------------|--------------------------------------|--------------------------------------|-------------------------------|--|
| <b>OriginalDateForRelativeTime</b> 2014-05-18T19:10:00 |                                                                            | <b>Multiplets Integrals Sum</b> 0.00 |                                      | <b>Number of Nuclei</b> 0 C's |  |
| <b>Acquisition Time (sec)</b> 1.3631                   | <b>Comment</b> MKA-1043-100-P1/CDCL3 C13CPD CDCI3 {D:\RA} SamTrack 7       | <b>Date</b> 18 May 2014 19:10:00     |                                      |                               |  |
| <b>Date Stamp</b> 18 May 2014 19:10:00                 | <b>File Name</b> \\inbgrdsfp01\elndata\MKA\NEWMKA-1043-100-P1\2\PDATA\1\1r |                                      |                                      |                               |  |
| <b>Frequency (MHz)</b> 100.62                          | <b>Nucleus</b> 13C                                                         | <b>Number of Transients</b> 10000    | <b>Origin</b> spect                  |                               |  |
| <b>Original Points Count</b> 32768                     | <b>Owner</b> nmrsu                                                         | <b>Points Count</b> 32768            | <b>Pulse Sequence</b> zgpg30         |                               |  |
| <b>Receiver Gain</b> 456.00                            | <b>SW(cyclical) (Hz)</b> 24038.46                                          | <b>Solvent</b> CHLOROFORM-d          |                                      |                               |  |
| <b>Spectrum Offset (Hz)</b> 10059.8848                 | <b>Spectrum Type</b> STANDARD                                              | <b>Sweep Width (Hz)</b> 24037.73     | <b>Temperature (degree C)</b> 27.000 |                               |  |

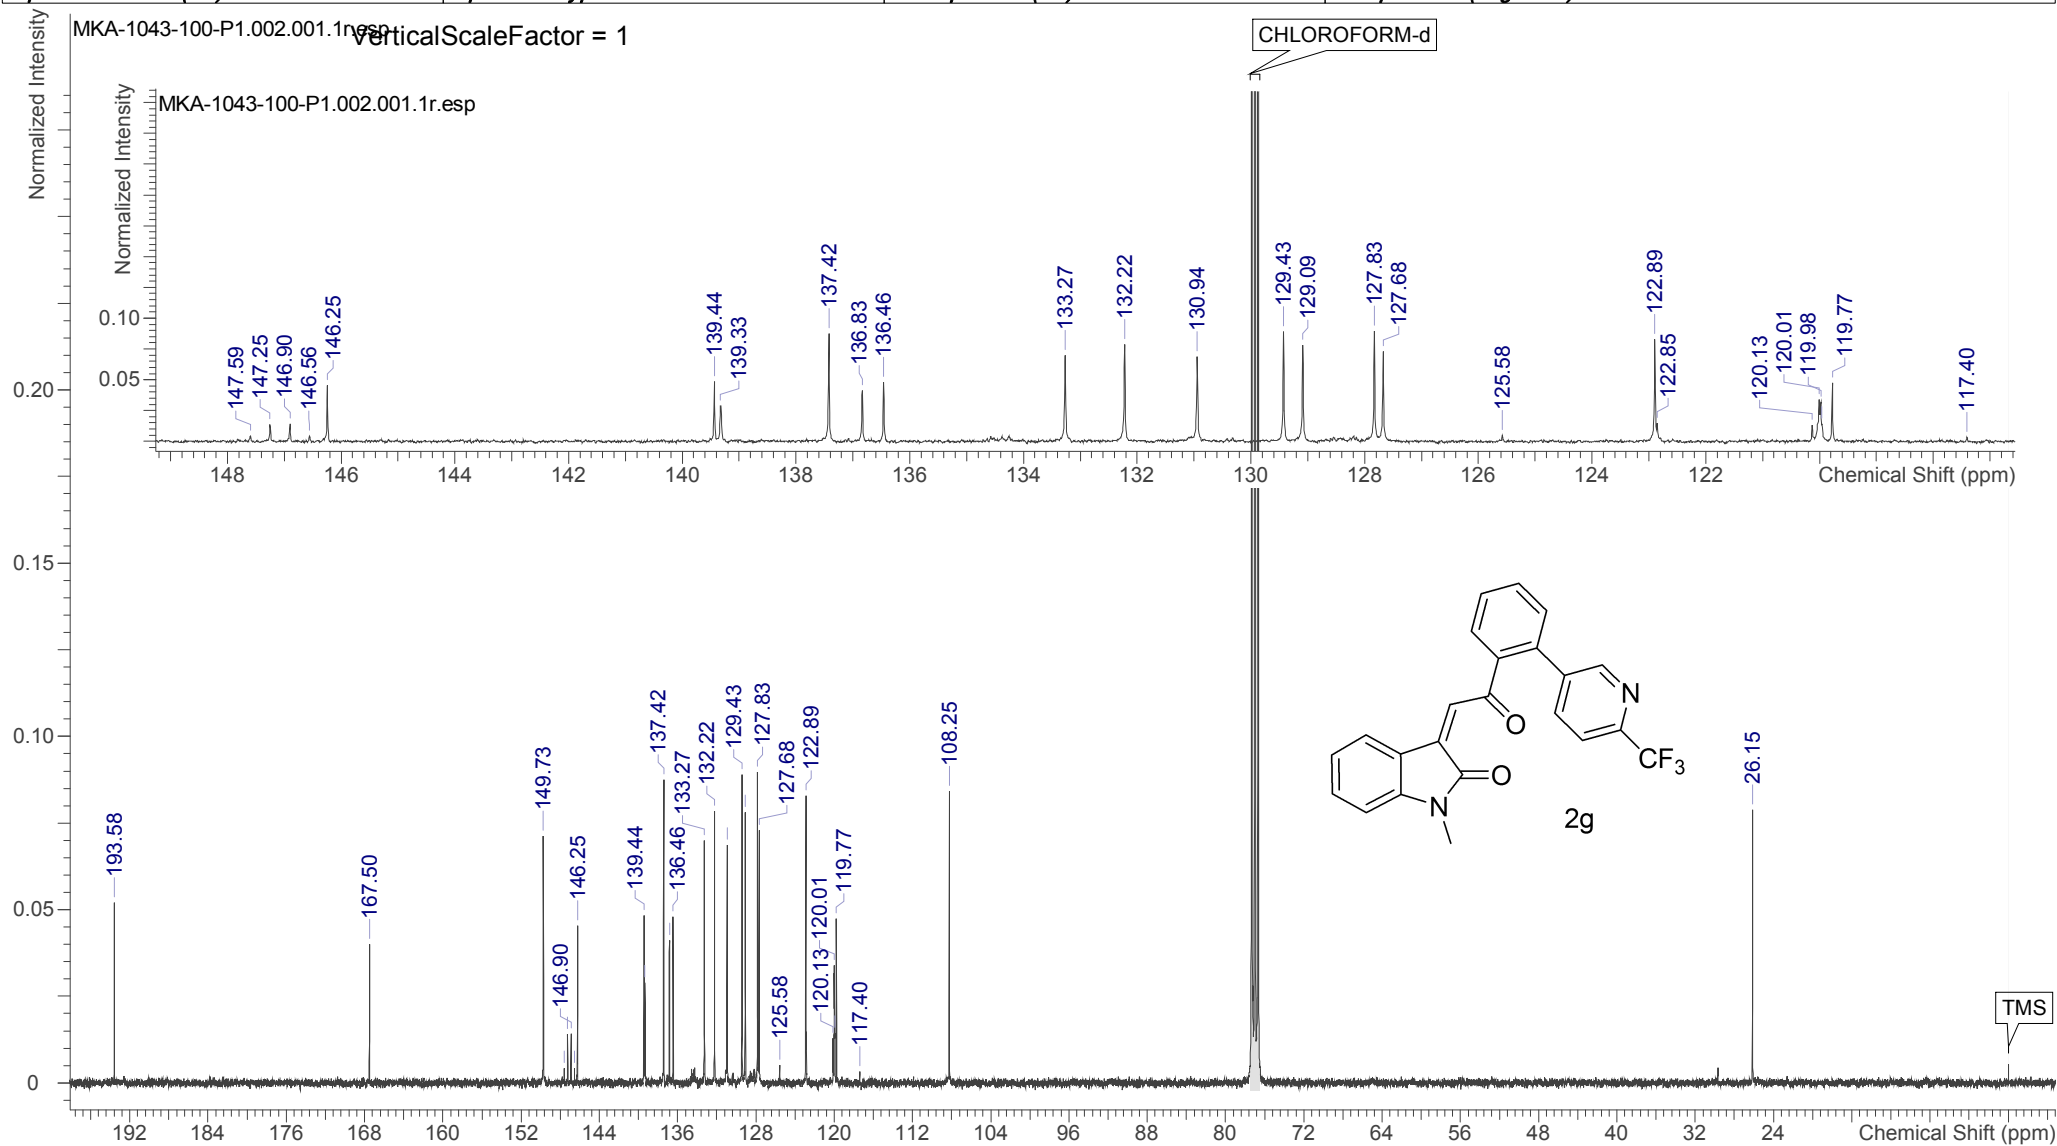

|                                                        |                                                                      |                                       |                                      |                                |  |
|--------------------------------------------------------|----------------------------------------------------------------------|---------------------------------------|--------------------------------------|--------------------------------|--|
| <b>OriginalDateForRelativeTime</b> 2014-04-21T01:16:56 |                                                                      | <b>Multiplets Integrals Sum</b> 15.17 |                                      | <b>Number of Nuclei</b> 15 H's |  |
| <b>Acquisition Time (sec)</b> 1.9923                   | <b>Comment</b> MKA-1043-82-P PROTON CDCl3 {D:\RA} SamTrack 60        | <b>Date</b> 21 Apr 2014 01:16:56      |                                      |                                |  |
| <b>Date Stamp</b> 21 Apr 2014 01:16:56                 | <b>File Name</b> \\inbgrdsp01\elndata\MKA\MKA-1043-82-P\1\PDATA\1\1r |                                       |                                      |                                |  |
| <b>Frequency (MHz)</b> 400.13                          | <b>Nucleus</b> 1H                                                    | <b>Number of Transients</b> 16        | <b>Origin</b> spect                  |                                |  |
| <b>Original Points Count</b> 16384                     | <b>Owner</b> nmrsu                                                   | <b>Points Count</b> 16384             | <b>Pulse Sequence</b> zg30           |                                |  |
| <b>Receiver Gain</b> 80.60                             | <b>SW(cyclical) (Hz)</b> 8223.68                                     | <b>Solvent</b> CHLOROFORM-d           |                                      |                                |  |
| <b>Spectrum Offset (Hz)</b> 2465.5046                  | <b>Spectrum Type</b> STANDARD                                        | <b>Sweep Width (Hz)</b> 8223.18       | <b>Temperature (degree C)</b> 27.000 |                                |  |

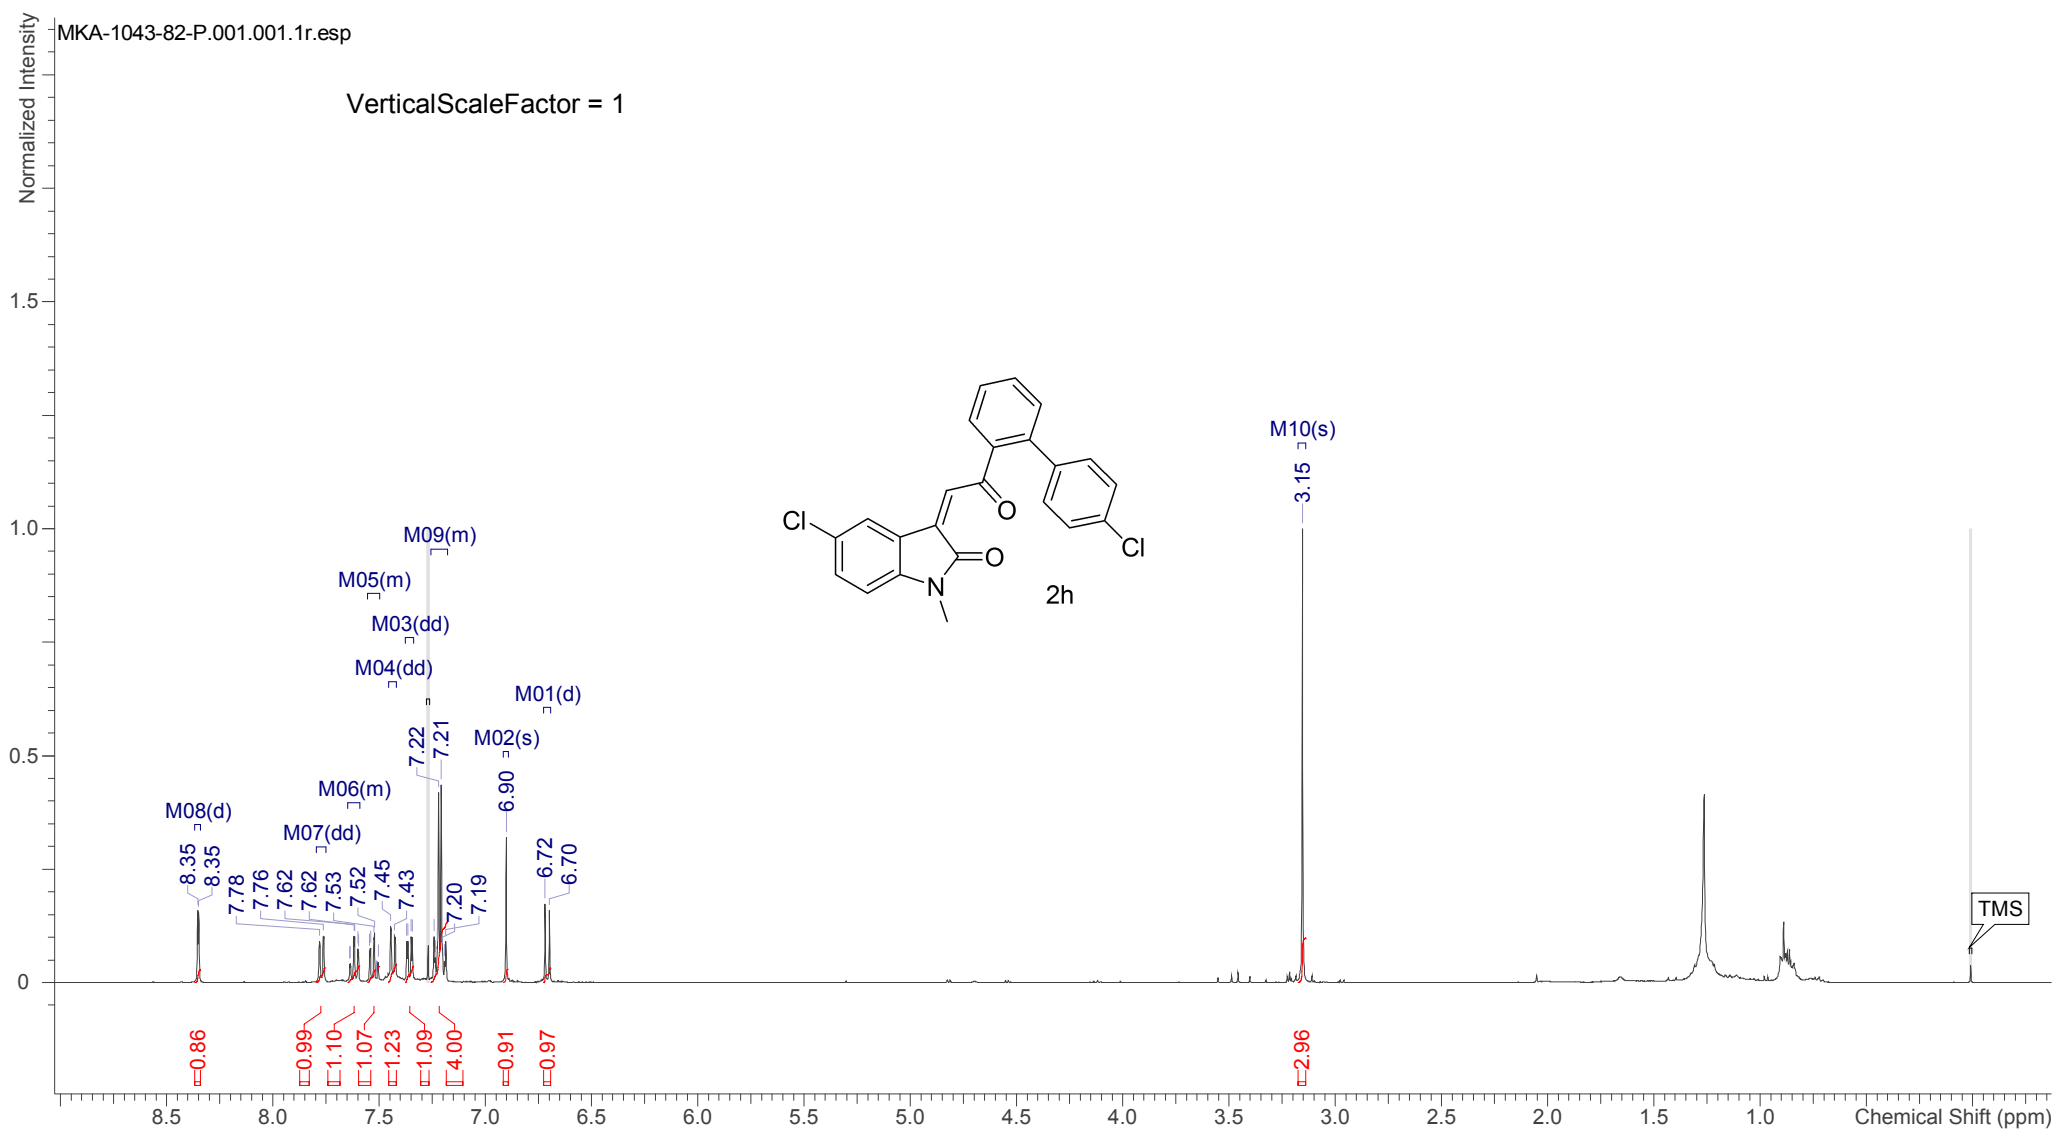

|                                    |                      |                                 |                                                   |                               |                      |
|------------------------------------|----------------------|---------------------------------|---------------------------------------------------|-------------------------------|----------------------|
| <b>OriginalDateForRelativeTime</b> | 2014-04-18T21:15:52  | <b>Multiplets Integrals Sum</b> | 0.00                                              | <b>Number of Nuclei</b>       | 0 C's                |
| <b>Acquisition Time (sec)</b>      | 1.3631               | <b>Comment</b>                  | MKA-1043-82 C13CPD CDCl3 {D:\RA} SamTrack 46      | <b>Date</b>                   | 18 Apr 2014 21:15:52 |
| <b>Date Stamp</b>                  | 18 Apr 2014 21:15:52 | <b>File Name</b>                | \\inbgrdsfp01\indata\MKA\MKA-1043-82\2\PDATA\1\1r |                               |                      |
| <b>Frequency (MHz)</b>             | 100.62               | <b>Nucleus</b>                  | 13C                                               | <b>Number of Transients</b>   | 3000                 |
| <b>Original Points Count</b>       | 32768                | <b>Owner</b>                    | nmsu                                              | <b>Points Count</b>           | 32768                |
| <b>Receiver Gain</b>               | 362.00               | <b>SW(cyclical) (Hz)</b>        | 24038.46                                          | <b>Solvent</b>                | CHLOROFORM-d         |
| <b>Spectrum Offset (Hz)</b>        | 10060.6182           | <b>Spectrum Type</b>            | STANDARD                                          | <b>Sweep Width (Hz)</b>       | 24037.73             |
|                                    |                      |                                 |                                                   | <b>Temperature (degree C)</b> | 27.000               |

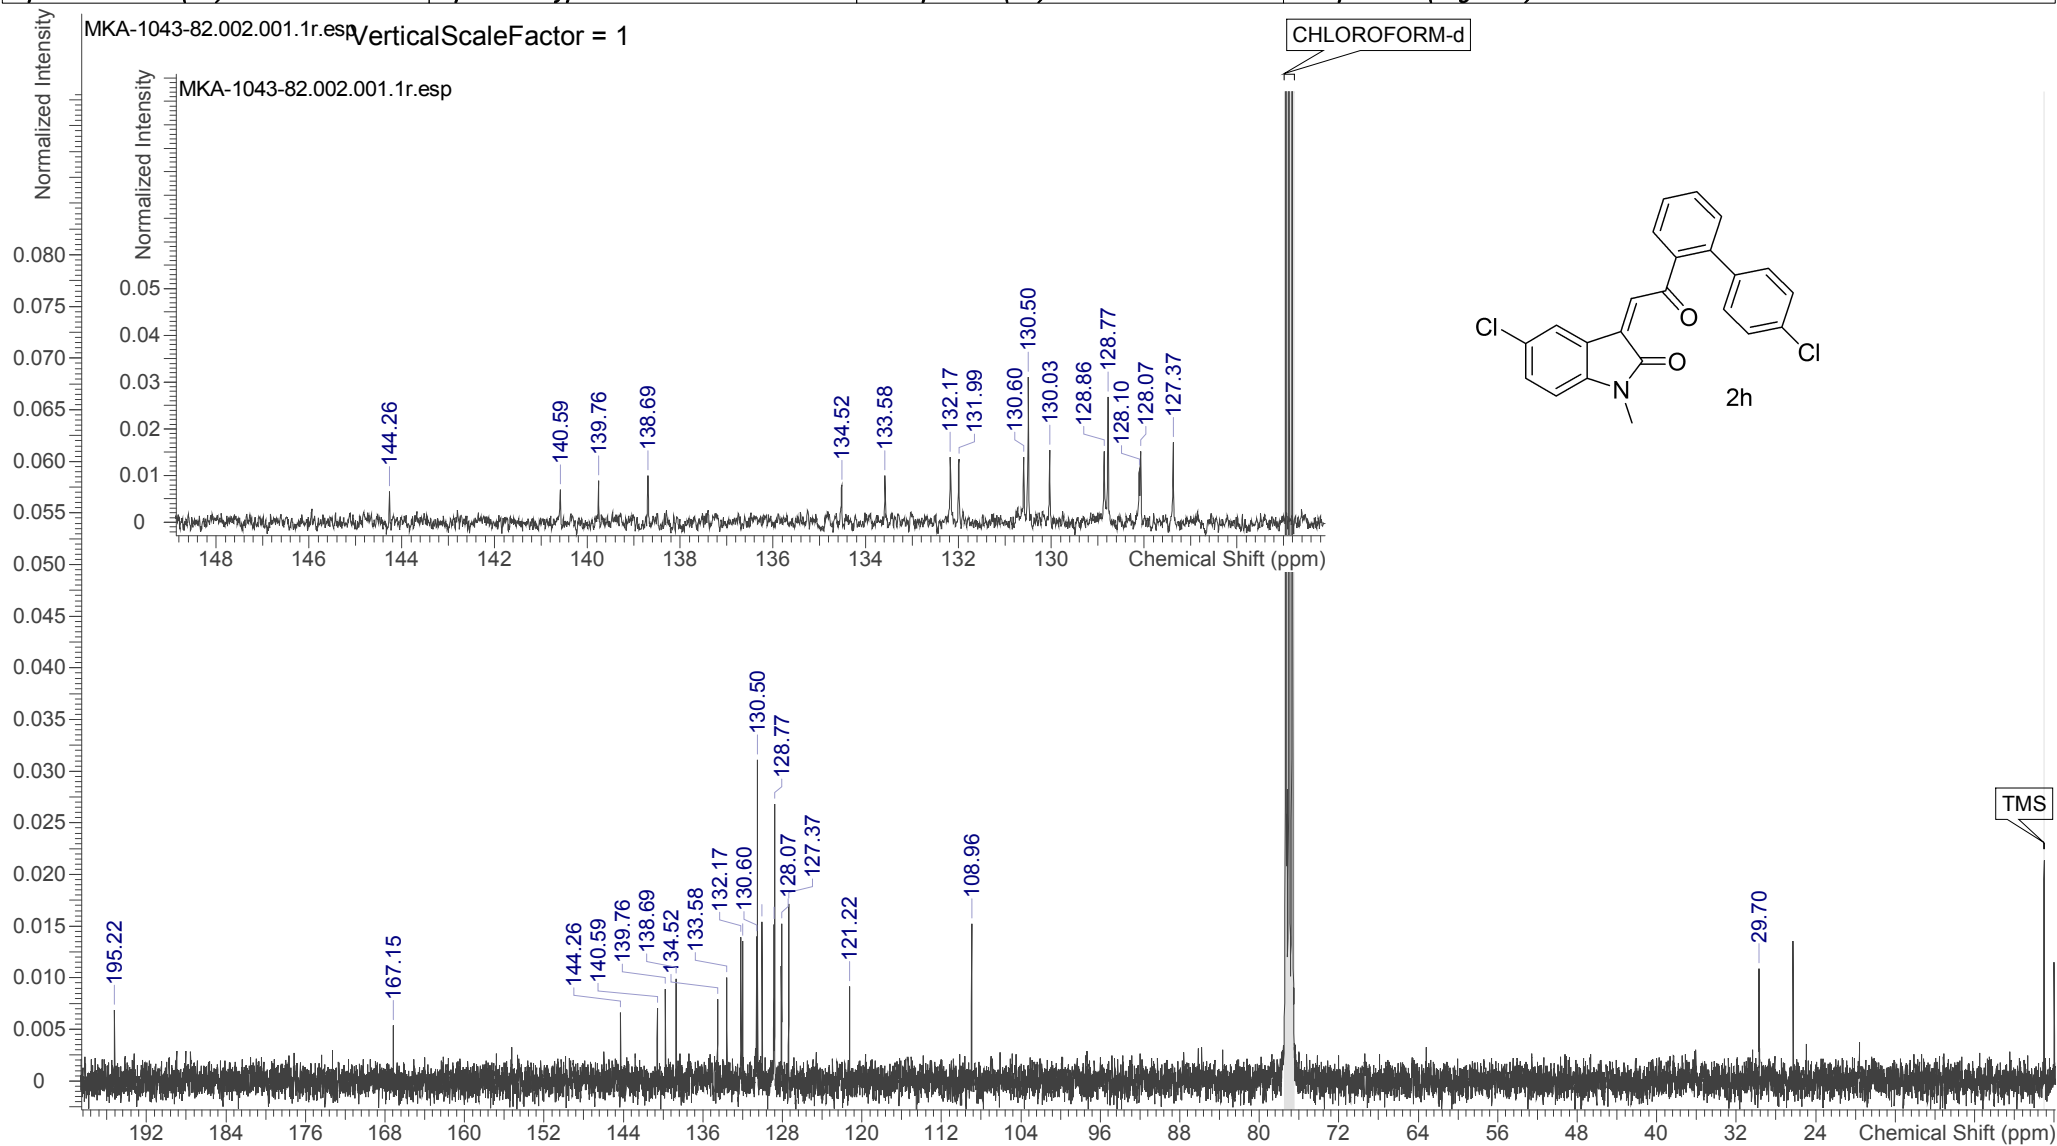

|                                                        |                                                                     |                                       |                                      |                                |  |
|--------------------------------------------------------|---------------------------------------------------------------------|---------------------------------------|--------------------------------------|--------------------------------|--|
| <b>OriginalDateForRelativeTime</b> 2014-04-16T22:22:00 |                                                                     | <b>Multiplets Integrals Sum</b> 14.15 |                                      | <b>Number of Nuclei</b> 14 H's |  |
| <b>Acquisition Time (sec)</b> 1.9923                   | <b>Comment</b> MKA-1043-98/CDCI3 PROTON CDCI3 {D:1RA} astra 36      | <b>Date</b> 16 Apr 2014 22:22:00      |                                      |                                |  |
| <b>Date Stamp</b> 16 Apr 2014 22:22:00                 | <b>File Name</b> \\inbgrdsfp01\elndata\MKA\MKA-1043-98\1\PDATA\1\1r |                                       |                                      |                                |  |
| <b>Frequency (MHz)</b> 400.13                          | <b>Nucleus</b> 1H                                                   | <b>Number of Transients</b> 16        | <b>Origin</b> spect                  |                                |  |
| <b>Original Points Count</b> 16384                     | <b>Owner</b> nmrsu                                                  | <b>Points Count</b> 16384             | <b>Pulse Sequence</b> zg30           |                                |  |
| <b>Receiver Gain</b> 287.00                            | <b>SW(cyclical) (Hz)</b> 8223.68                                    | <b>Solvent</b> CHLOROFORM-d           |                                      |                                |  |
| <b>Spectrum Offset (Hz)</b> 2465.5046                  | <b>Spectrum Type</b> STANDARD                                       | <b>Sweep Width (Hz)</b> 8223.18       | <b>Temperature (degree C)</b> 27.000 |                                |  |

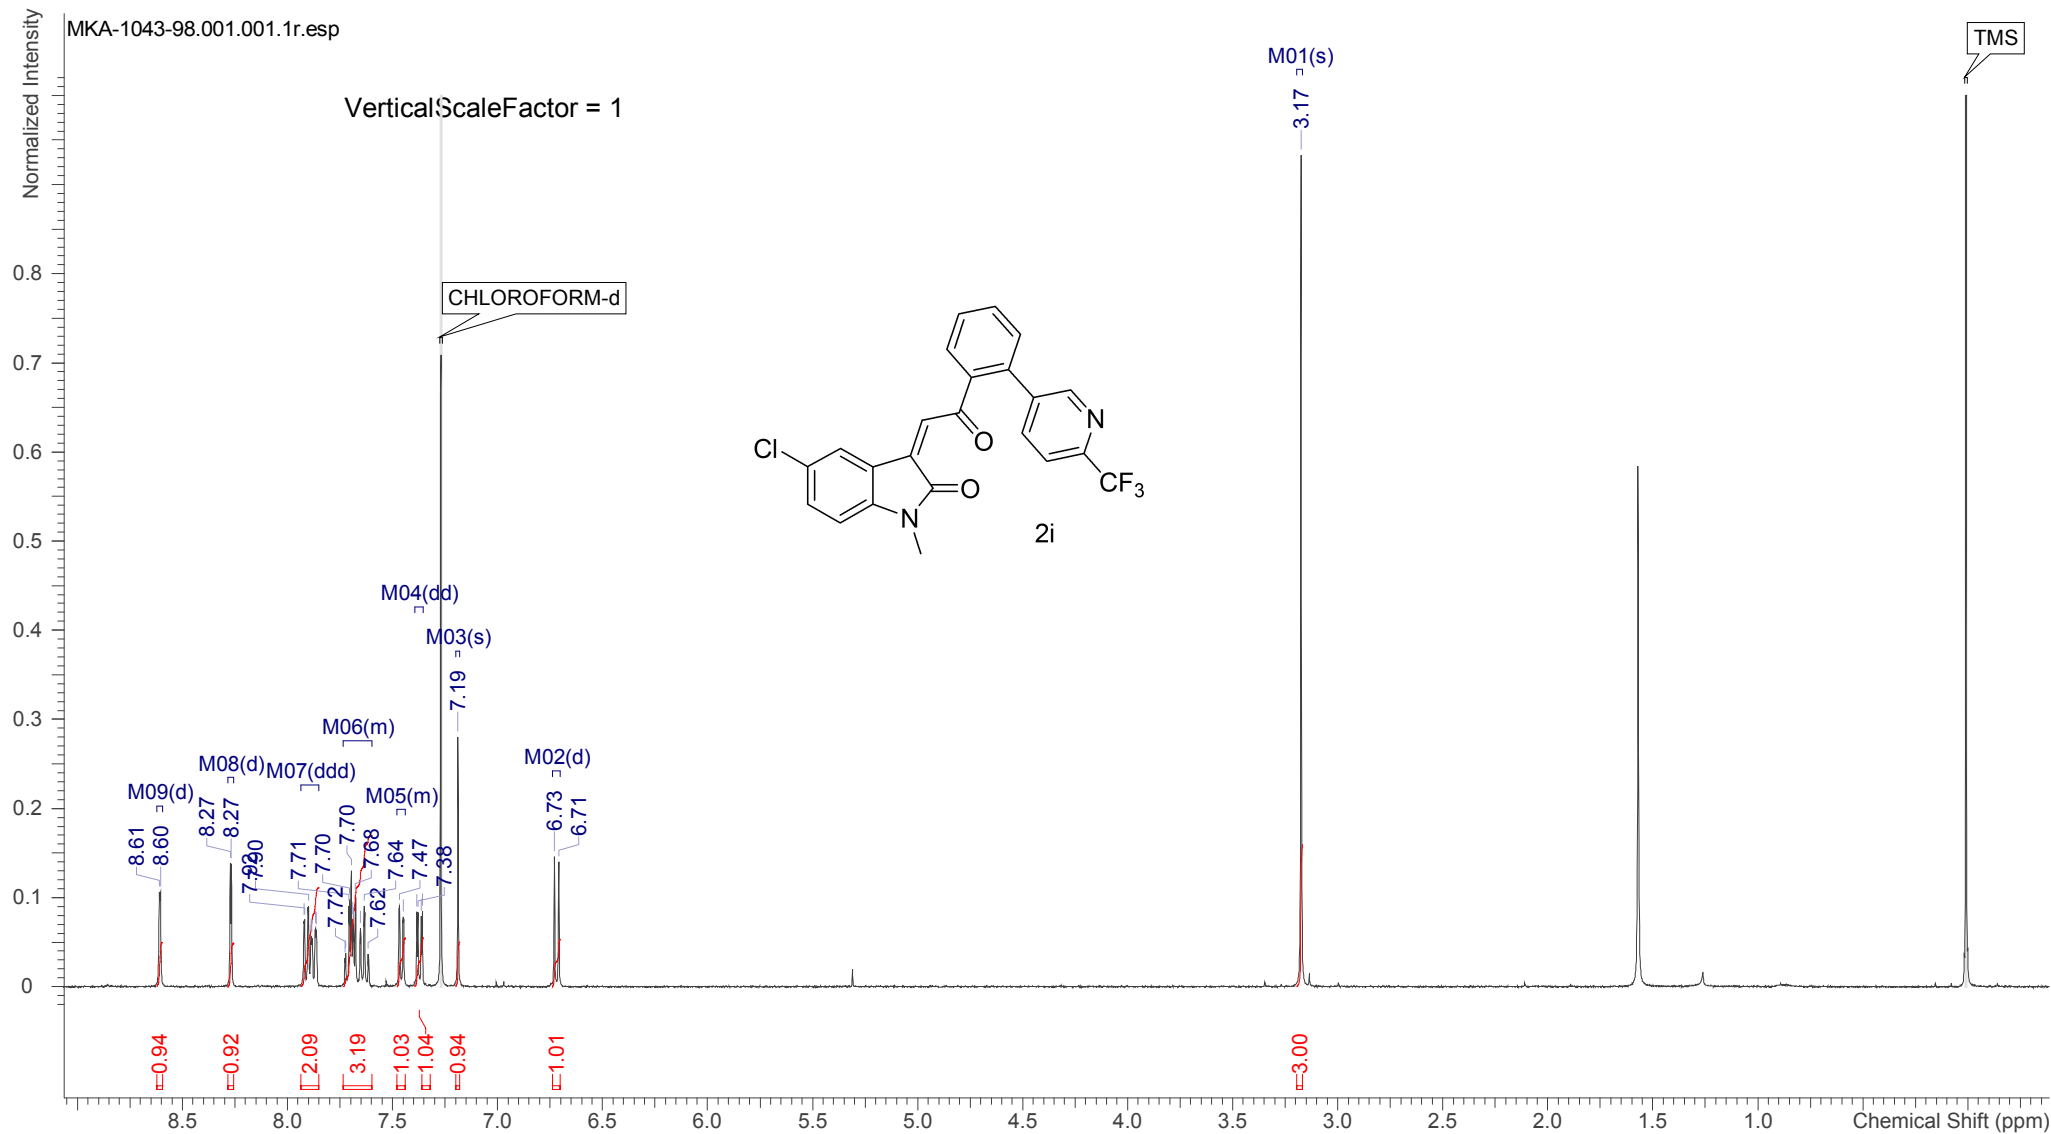

|                                                        |                                                                              |                                      |                                        |                               |  |
|--------------------------------------------------------|------------------------------------------------------------------------------|--------------------------------------|----------------------------------------|-------------------------------|--|
| <b>OriginalDateForRelativeTime</b> 2014-05-03T08:34:16 |                                                                              | <b>Multiplets Integrals Sum</b> 0.00 |                                        | <b>Number of Nuclei</b> 0 C's |  |
| <b>Acquisition Time (sec)</b> 1.0912                   | <b>Comment</b> MKA-1043-98 C13CPD CDCl3 {F:\ecm\DATA\2014-04} bionmr 15      | <b>Date</b> 03 May 2014 08:34:16     |                                        |                               |  |
| <b>Date Stamp</b> 03 May 2014 08:34:16                 | <b>File Name</b> \\inbgrdsfp01\elndata\MKA\07052014\MKA-1043-98\2\PDATA\1\1r |                                      |                                        |                               |  |
| <b>Frequency (MHz)</b> 125.77                          | <b>Nucleus</b> 13C                                                           | <b>Number of Transients</b> 10000    | <b>Origin</b> spect                    |                               |  |
| <b>Original Points Count</b> 32768                     | <b>Owner</b> administrator                                                   | <b>Points Count</b> 32768            | <b>Pulse Sequence</b> zgpg30           |                               |  |
| <b>Receiver Gain</b> 32768.00                          | <b>SW(cyclical) (Hz)</b> 30030.03                                            | <b>Solvent</b> CHLOROFORM-d          | <b>Spectrum Offset (Hz)</b> 12573.4072 |                               |  |
| <b>Spectrum Type</b> STANDARD                          | <b>Sweep Width (Hz)</b> 30029.11                                             | <b>Temperature (degree C)</b> 25.000 |                                        |                               |  |

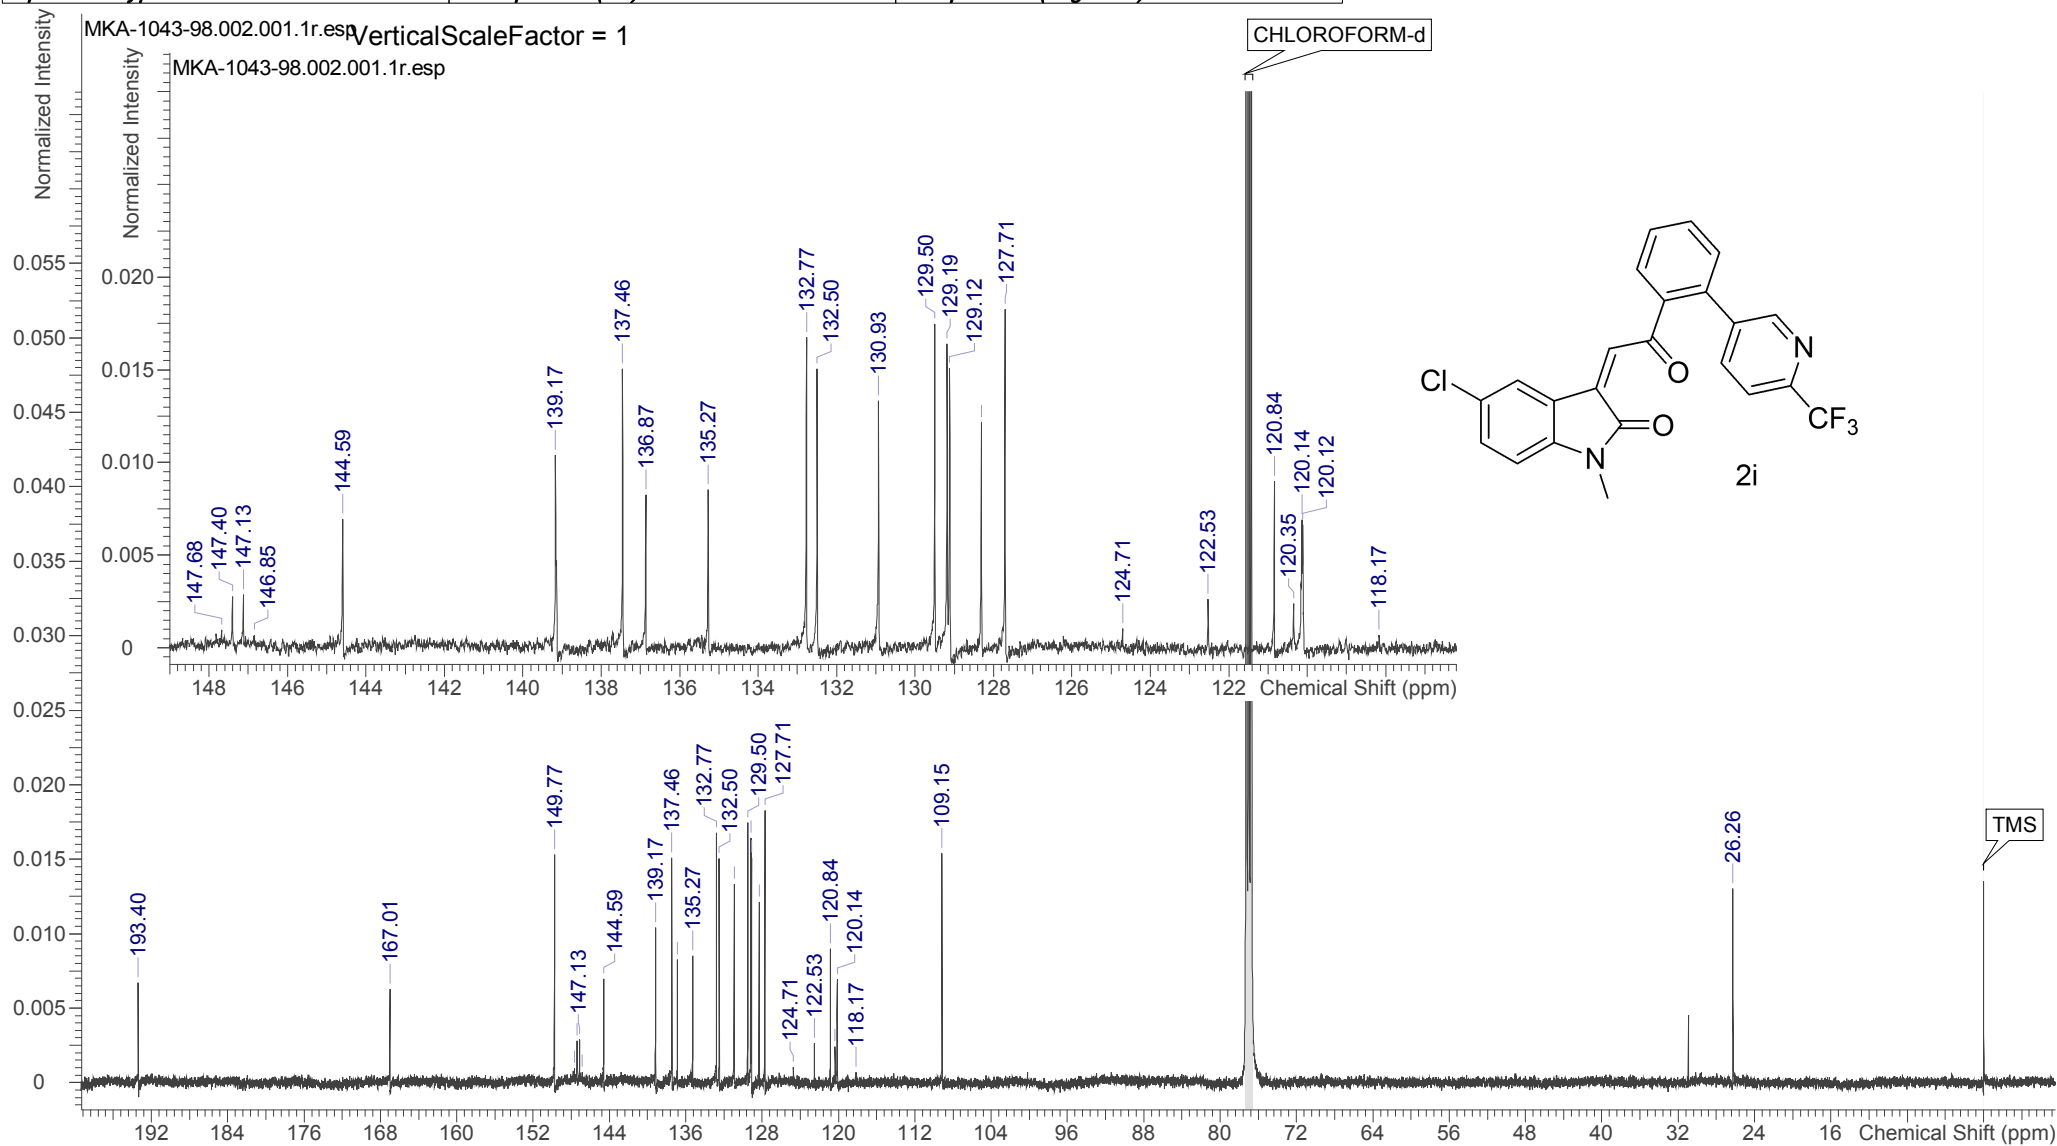



|                                                        |                                                                    |                                       |                                      |                                  |  |
|--------------------------------------------------------|--------------------------------------------------------------------|---------------------------------------|--------------------------------------|----------------------------------|--|
| <b>OriginalDateForRelativeTime</b> 2014-04-18T15:26:00 |                                                                    | <b>Multiplets Integrals Sum</b> 15.44 |                                      | <b>Number of Nuclei</b> 15 H's   |  |
| <b>Acquisition Time (sec)</b> 1.9923                   | <b>Comment</b> MKA-1043-95 PROTON CDCl3 {D:IRA} SamTrack 45        |                                       |                                      | <b>Date</b> 18 Apr 2014 15:26:00 |  |
| <b>Date Stamp</b> 18 Apr 2014 15:26:00                 | <b>File Name</b> \\inbgrdsp01\elndata\MKA\MKA-1043-95\1\PDATA\1\1r |                                       |                                      |                                  |  |
| <b>Frequency (MHz)</b> 400.13                          | <b>Nucleus</b> 1H                                                  | <b>Number of Transients</b> 16        | <b>Origin</b> spect                  |                                  |  |
| <b>Original Points Count</b> 16384                     | <b>Owner</b> nmrsu                                                 | <b>Points Count</b> 16384             | <b>Pulse Sequence</b> zg30           |                                  |  |
| <b>Receiver Gain</b> 181.00                            | <b>SW(cyclical) (Hz)</b> 8223.68                                   | <b>Solvent</b> CHLOROFORM-d           |                                      |                                  |  |
| <b>Spectrum Offset (Hz)</b> 2465.5046                  | <b>Spectrum Type</b> STANDARD                                      | <b>Sweep Width (Hz)</b> 8223.18       | <b>Temperature (degree C)</b> 27.000 |                                  |  |

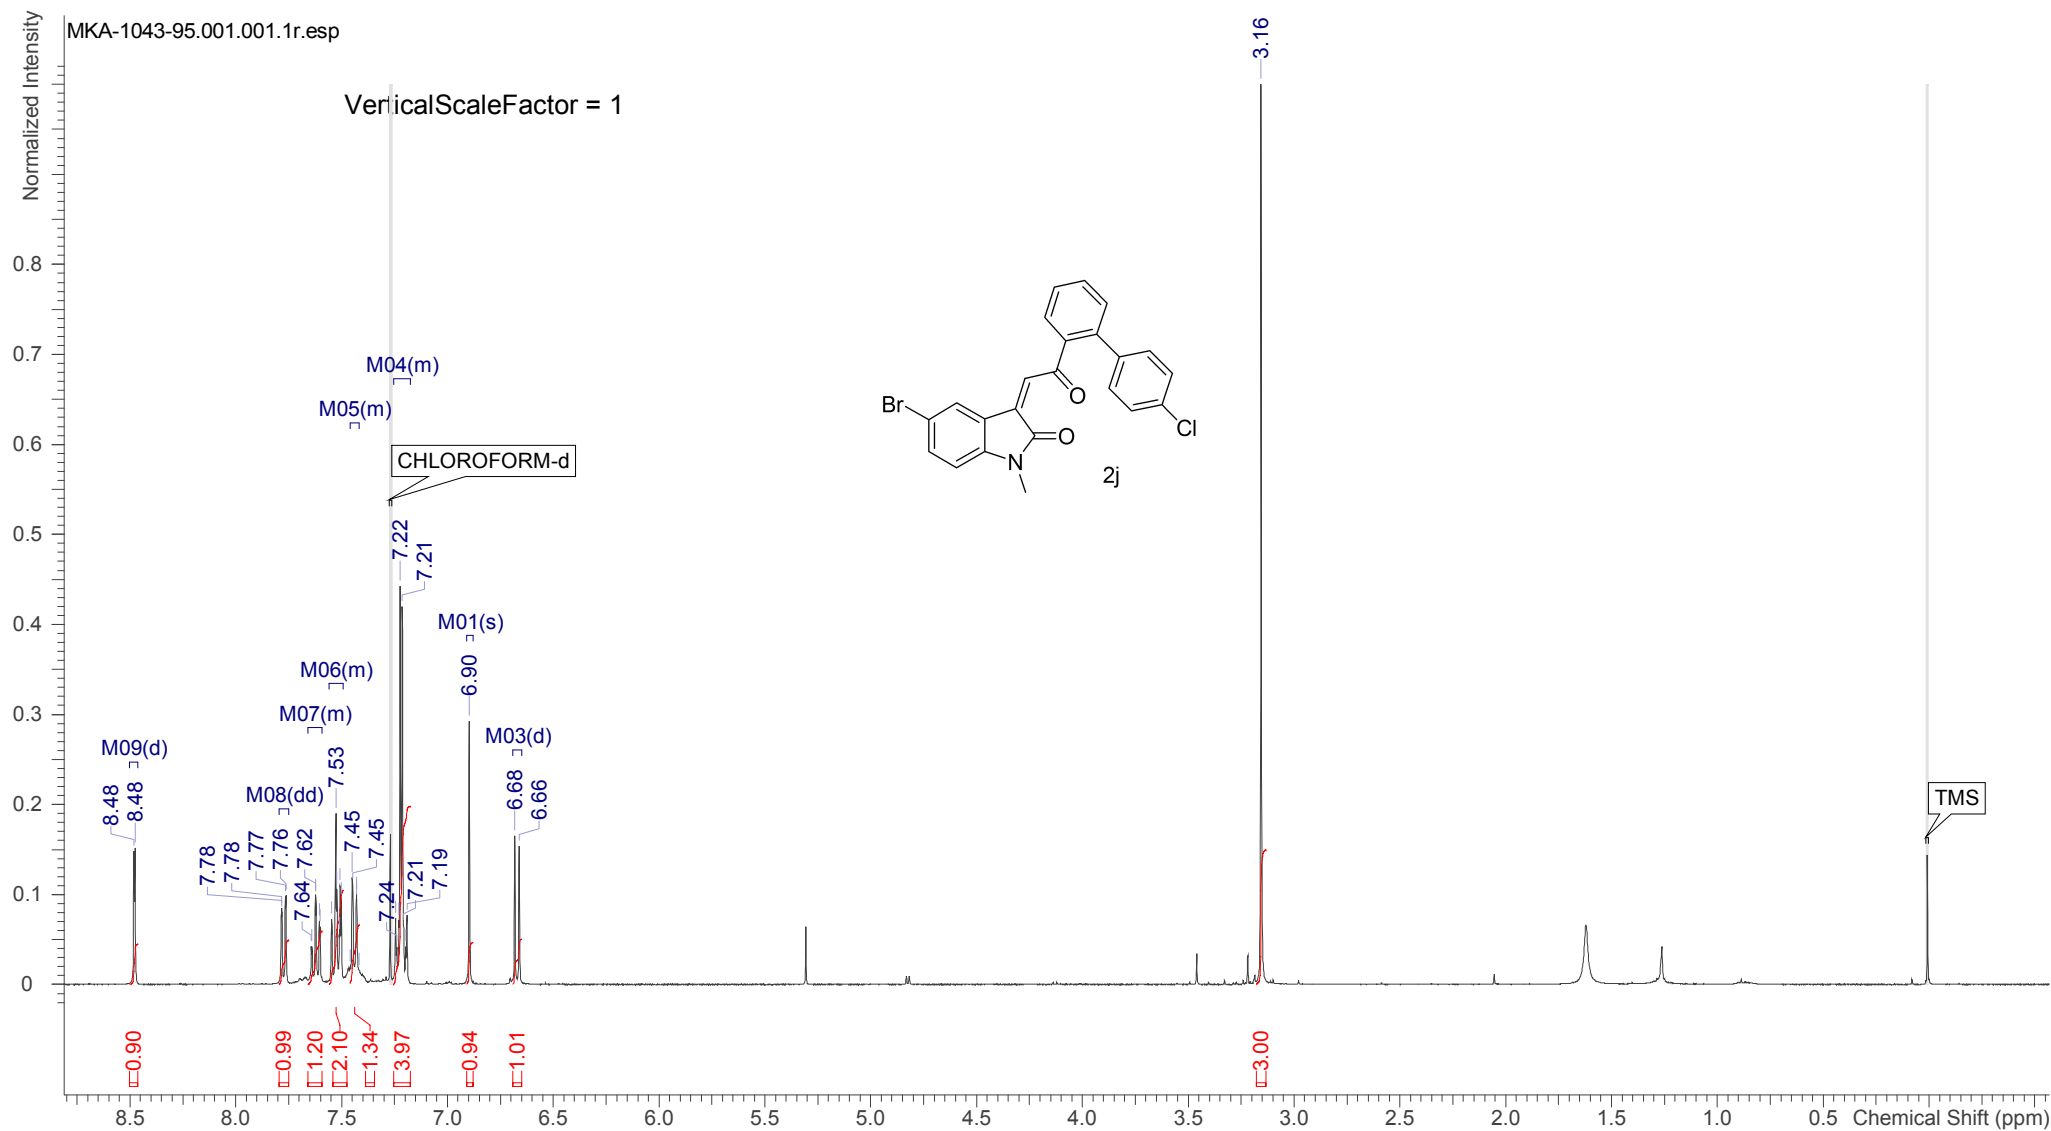

|                                                        |                                                                    |                                      |                                      |                                  |  |
|--------------------------------------------------------|--------------------------------------------------------------------|--------------------------------------|--------------------------------------|----------------------------------|--|
| <b>OriginalDateForRelativeTime</b> 2014-04-18T18:18:48 |                                                                    | <b>Multiplets Integrals Sum</b> 0.00 |                                      | <b>Number of Nuclei</b> 0 C's    |  |
| <b>Acquisition Time (sec)</b> 1.3631                   | <b>Comment</b> MKA-1043-95 C13CPD CDCl3 {D:\RA} SamTrack 45        |                                      |                                      | <b>Date</b> 18 Apr 2014 18:18:48 |  |
| <b>Date Stamp</b> 18 Apr 2014 18:18:48                 | <b>File Name</b> \\inbgrdsfp01\indata\MKA\MKA-1043-95\2\PDATA\1\1r |                                      |                                      |                                  |  |
| <b>Frequency (MHz)</b> 100.62                          | <b>Nucleus</b> 13C                                                 | <b>Number of Transients</b> 3000     | <b>Origin</b> spect                  |                                  |  |
| <b>Original Points Count</b> 32768                     | <b>Owner</b> nmrsu                                                 | <b>Points Count</b> 32768            | <b>Pulse Sequence</b> zgpg30         |                                  |  |
| <b>Receiver Gain</b> 456.00                            | <b>SW(cyclical) (Hz)</b> 24038.46                                  | <b>Solvent</b> CHLOROFORM-d          |                                      |                                  |  |
| <b>Spectrum Offset (Hz)</b> 10059.1504                 | <b>Spectrum Type</b> STANDARD                                      | <b>Sweep Width (Hz)</b> 24037.73     | <b>Temperature (degree C)</b> 27.000 |                                  |  |

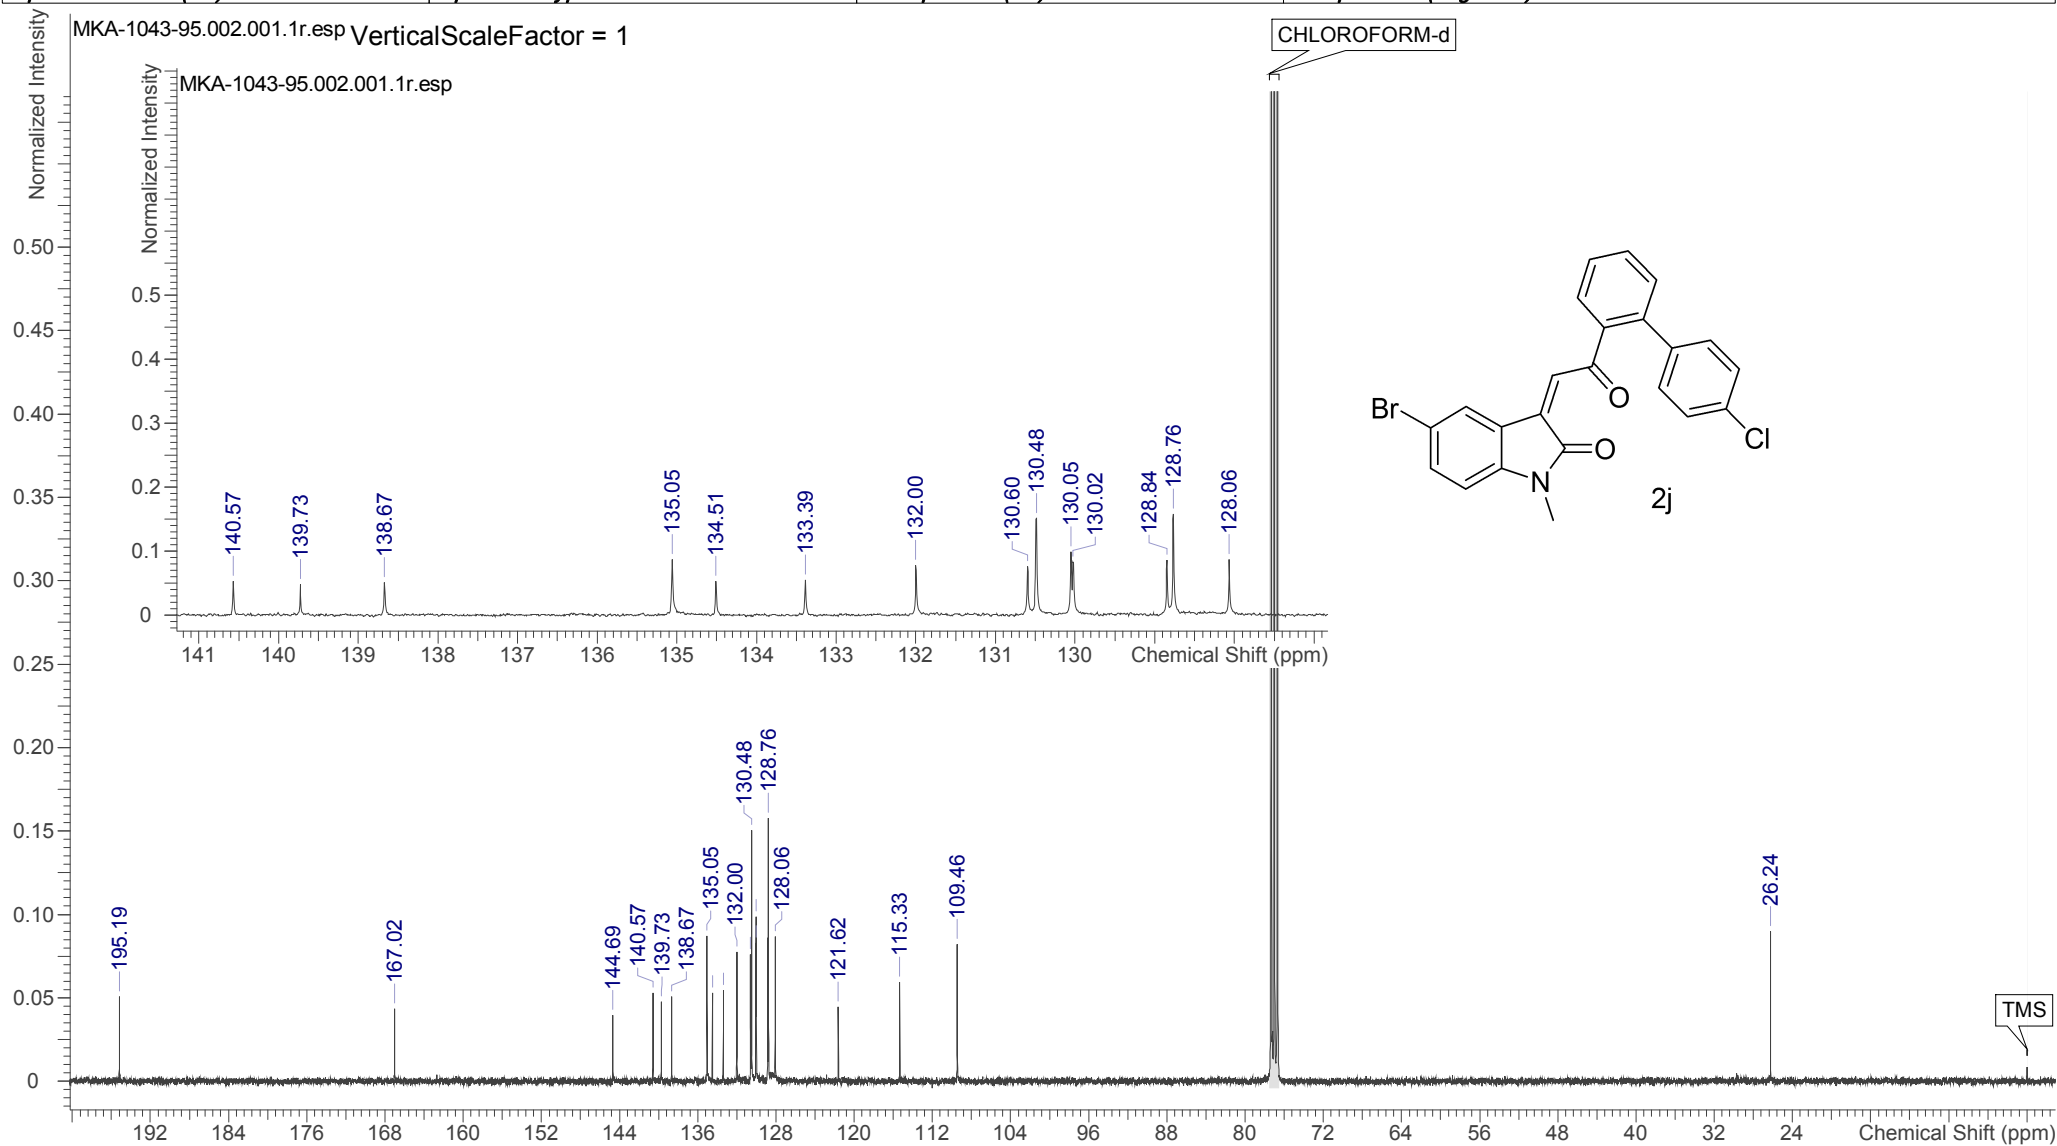

|                                    |                      |                                 |                                                   |                               |                      |
|------------------------------------|----------------------|---------------------------------|---------------------------------------------------|-------------------------------|----------------------|
| <i>OriginalDateForRelativeTime</i> | 2014-04-18T00:42:48  | <i>Multiplets Integrals Sum</i> | 17.84                                             | <i>Number of Nuclei</i>       | 18 H's               |
| <i>Acquisition Time (sec)</i>      | 1.9923               | <i>Comment</i>                  | MKA-1043-83 PROTON CDCl3 {D:\RA} SamTrack 40      | <i>Date</i>                   | 18 Apr 2014 00:42:48 |
| <i>Date Stamp</i>                  | 18 Apr 2014 00:42:48 | <i>File Name</i>                | \\inbgrdsp01\elndata\MKA\MKA-1043-83\1\PDATA\1\1r |                               |                      |
| <i>Frequency (MHz)</i>             | 400.13               | <i>Nucleus</i>                  | 1H                                                | <i>Number of Transients</i>   | 16                   |
| <i>Original Points Count</i>       | 16384                | <i>Owner</i>                    | nmrsu                                             | <i>Points Count</i>           | 16384                |
| <i>Receiver Gain</i>               | 128.00               | <i>SW(cyclical) (Hz)</i>        | 8223.68                                           | <i>Solvent</i>                | CHLOROFORM-d         |
| <i>Spectrum Offset (Hz)</i>        | 2465.5046            | <i>Spectrum Type</i>            | STANDARD                                          | <i>Sweep Width (Hz)</i>       | 8223.18              |
|                                    |                      |                                 |                                                   | <i>Temperature (degree C)</i> | 27.000               |

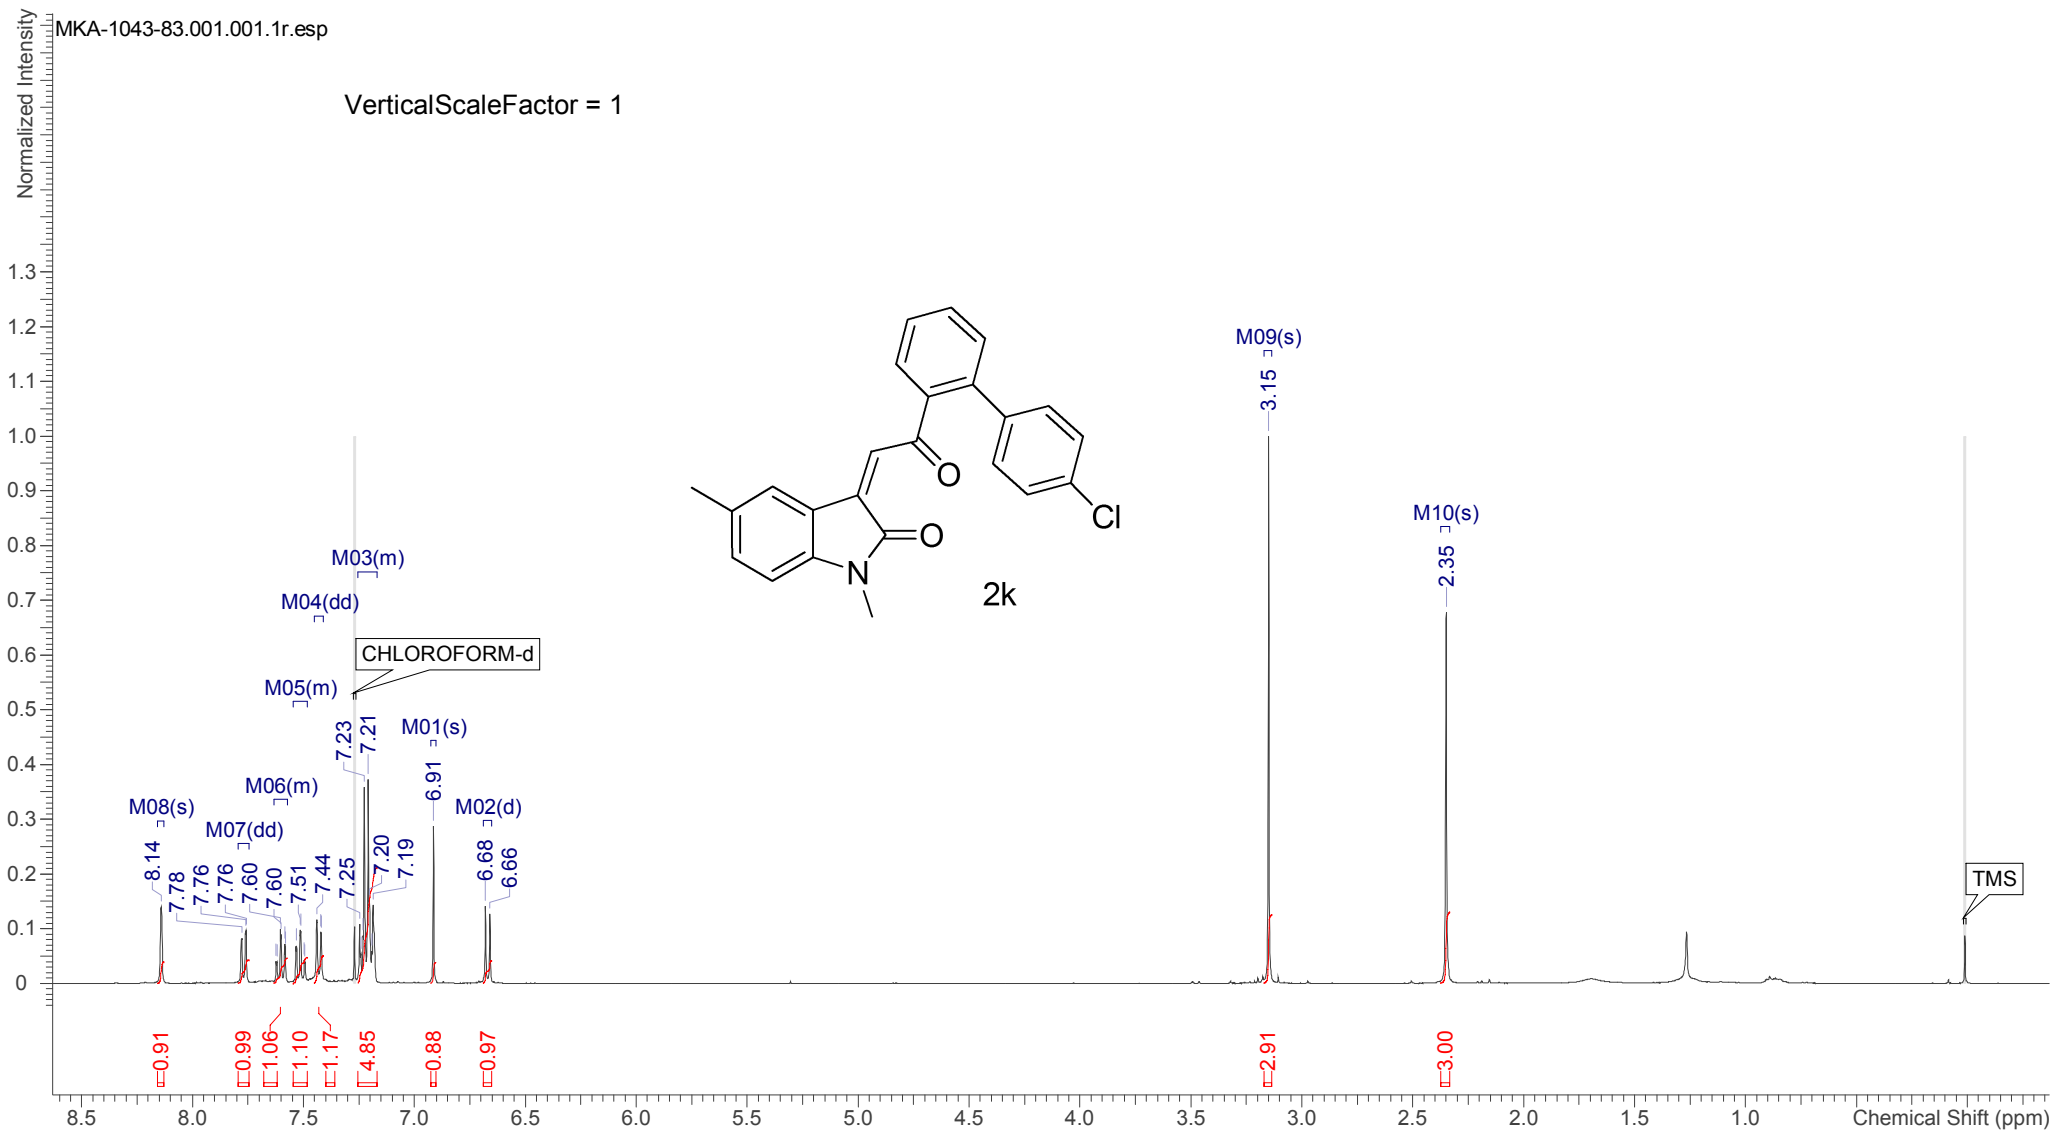

|                                                        |                                                                     |                                      |                                      |                                  |  |
|--------------------------------------------------------|---------------------------------------------------------------------|--------------------------------------|--------------------------------------|----------------------------------|--|
| <b>OriginalDateForRelativeTime</b> 2014-04-18T03:33:28 |                                                                     | <b>Multiplets Integrals Sum</b> 0.00 |                                      | <b>Number of Nuclei</b> 0 C's    |  |
| <b>Acquisition Time (sec)</b> 1.3631                   | <b>Comment</b> MKA-1043-83 C13CPD CDCl3 {D:\RA} SamTrack 40         |                                      |                                      | <b>Date</b> 18 Apr 2014 03:33:28 |  |
| <b>Date Stamp</b> 18 Apr 2014 03:33:28                 | <b>File Name</b> \\inbgrdsfp01\elndata\MKA\MKA-1043-83\2\PDATA\1\1r |                                      |                                      |                                  |  |
| <b>Frequency (MHz)</b> 100.62                          | <b>Nucleus</b> 13C                                                  | <b>Number of Transients</b> 3000     | <b>Origin</b> spect                  |                                  |  |
| <b>Original Points Count</b> 32768                     | <b>Owner</b> nmrsu                                                  | <b>Points Count</b> 32768            | <b>Pulse Sequence</b> zgpg30         |                                  |  |
| <b>Receiver Gain</b> 456.00                            | <b>SW(cyclical) (Hz)</b> 24038.46                                   | <b>Solvent</b> CHLOROFORM-d          |                                      |                                  |  |
| <b>Spectrum Offset (Hz)</b> 10058.4170                 | <b>Spectrum Type</b> STANDARD                                       | <b>Sweep Width (Hz)</b> 24037.73     | <b>Temperature (degree C)</b> 27.000 |                                  |  |

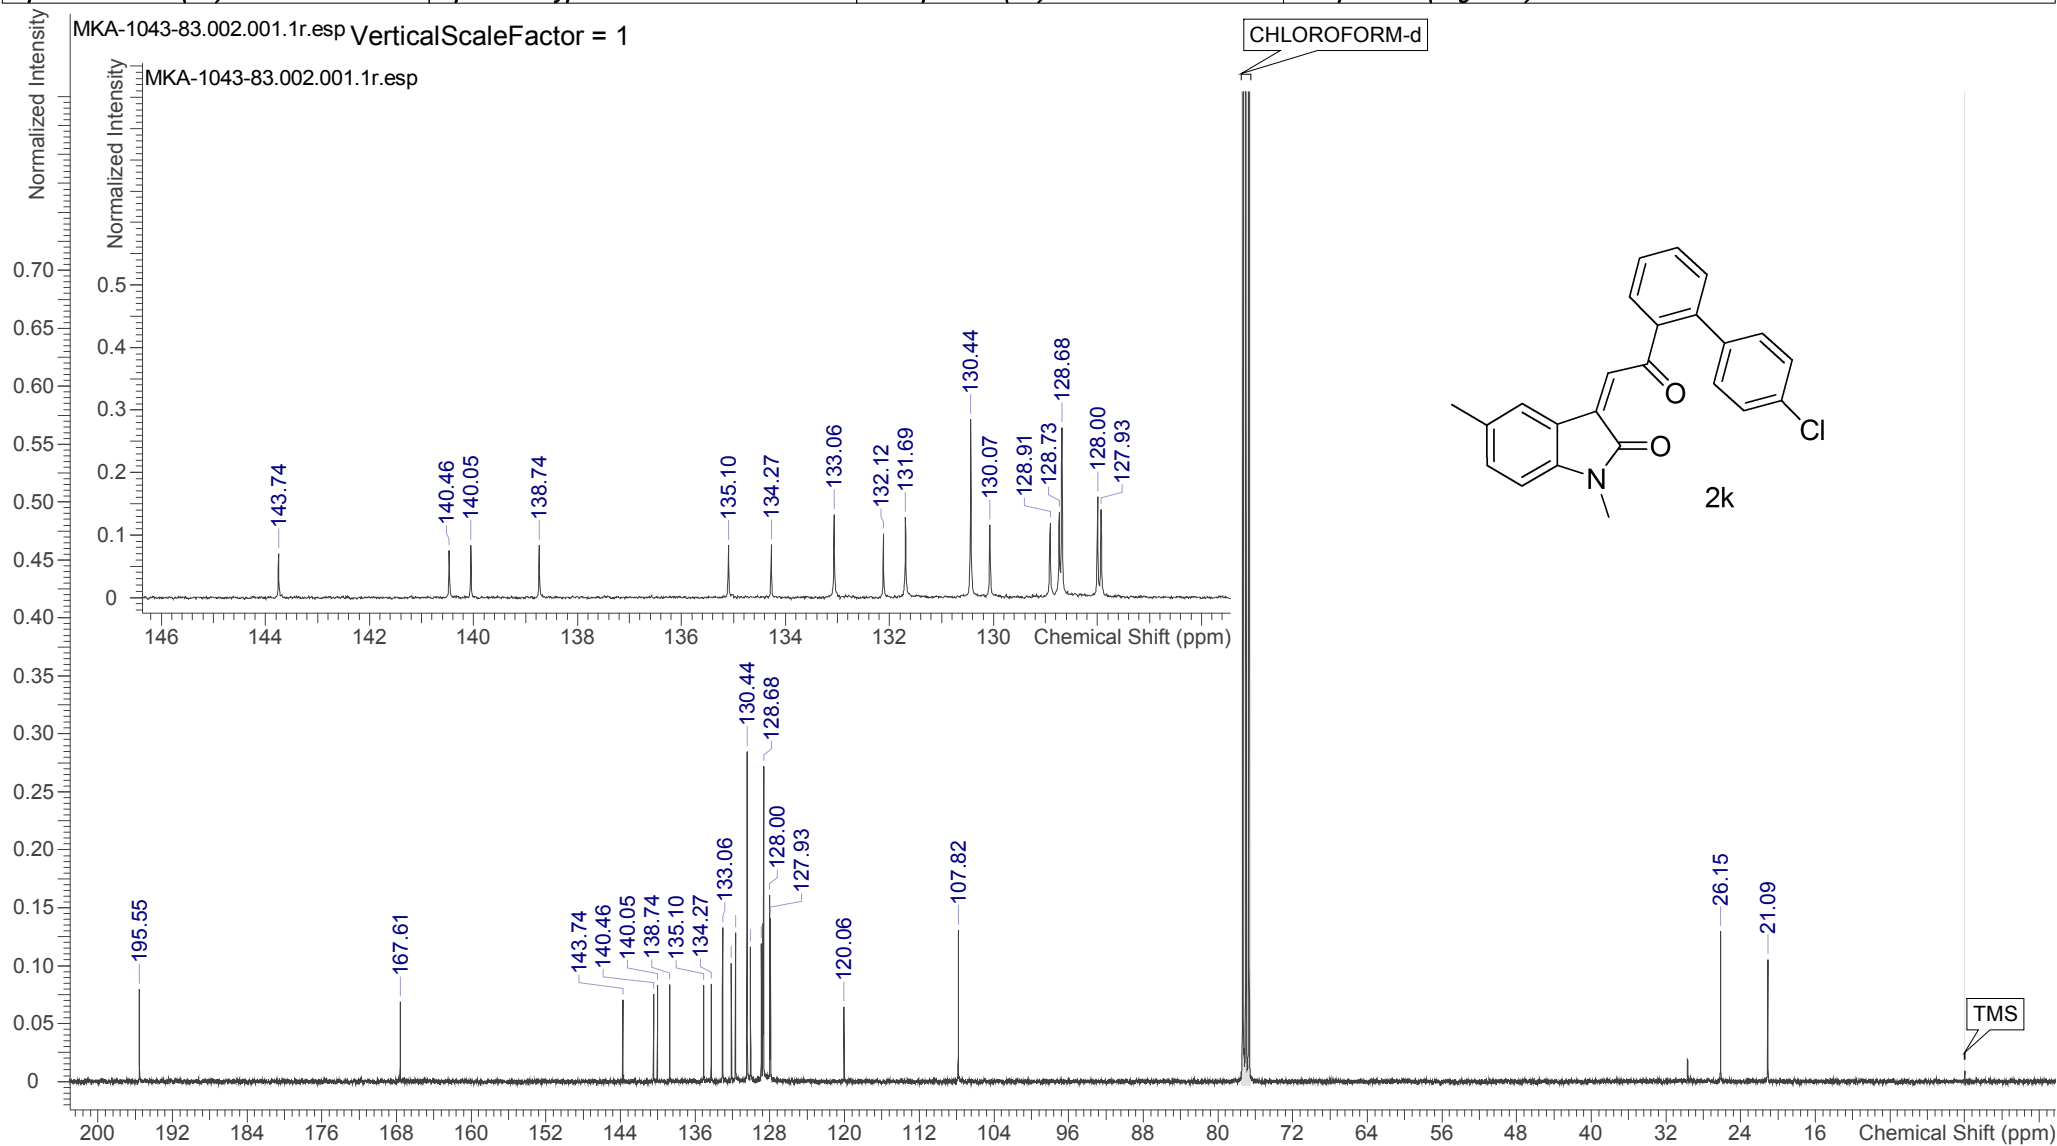

Supplement: c5ra05755h1.pdf [file c5ra05755h1.pdf]
